## Flexible perceptual encoding by discrete gamma events

Quentin Perrenoud, Antonio H. de O. Fonseca, Austin Airhart, James Bonanno, Rong Mao, Jessica A. Cardin

Department of Neuroscience, Kavli Institute for Neuroscience, Wu Tsai Institute, Yale University School of Medicine, New Haven CT

### Abstract

Although behaviorally relevant patterns of neocortical activity in specific frequency bands have been broadly characterized, identifying individual underlying network events remains a key challenge in understanding information processing in cortical circuits. Using a novel analytical method for temporally precise detection of discrete network events, we identified and tracked discrete sets of events underlying two major forms of state-dependent activity patterns in mouse V1 cortex in the  $\beta$  (15-30Hz) and  $\gamma$  (30-80Hz) ranges.  $\gamma$  events regulated spike timing and selectively enhanced visual encoding. Precise tracking revealed that  $\gamma$ , but not  $\beta$ , event rates increased prior to visually cued behavioral responses and were predictive of trial-by-trial visual task performance. Finally, the task-related temporal dynamics of  $\gamma$  events exhibited rapid plasticity during task learning and were modality-specific.  $\gamma$  events in mouse V1 thus flexibly enhance visual encoding according to behavioral context.

-----

Neocortical circuit function supports cognition and is critically affected by neurodevelopmental and psychiatric disorders<sup>1</sup>. However, cortical circuits exhibit complex and highly variable activity patterns during wakefulness<sup>2-6</sup>, posing a challenge to our understanding of the fine temporal dynamics of information processing during active behavior. Changes in overall power in specific frequency bands of cortical activity are easily detected in frequency spectra and have been linked to attention, perception, cognition, and memory processes. However, the neural network events underlying such changes are difficult to track with temporal precision.

To identify individual network events associated with state-dependent cortical activity motifs, we recorded V1 local field potentials (LFP) across cortical layers in freely running head-fixed mice (Fig. 1A-B, Fig. S1) and developed an analytical method to detect individual events in specific frequency bands (Clustering Band-limited Activity by State and Spectrotemporal feature, CBASS) (Fig. 1, Fig. S2, Supplementary Methods). CBASS identifies candidate events whose phase is aligned in a reference channel and retains events whose laminar profile of

spectrotemporal dynamics is associated with a pattern of activity enriched in a specific state (Fig. 1D, Fig. S2, Supplementary Methods).

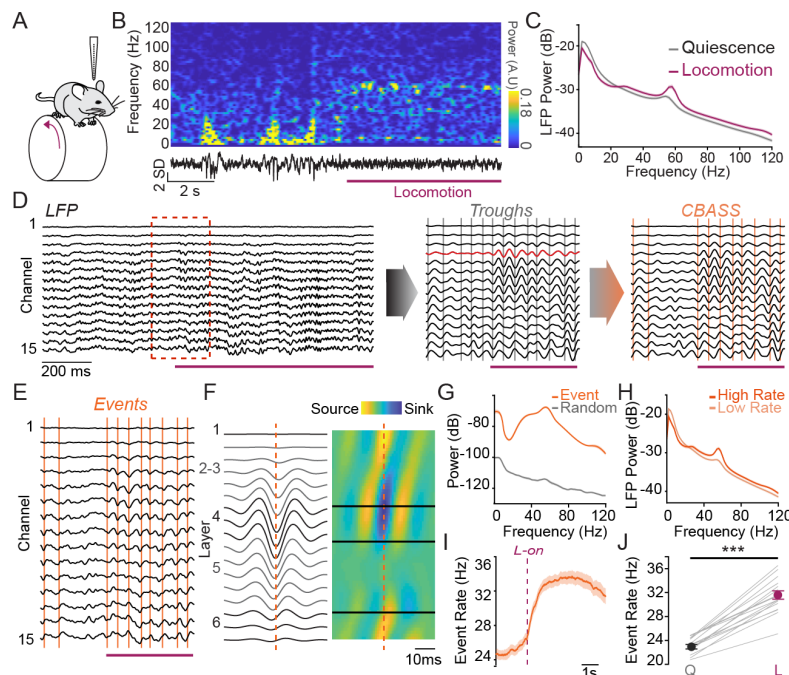

**Figure 1.** CBASS links global state-dependent changes in activity to defined network events. A: Mice were head-fixed on a wheel and V1 activity was recorded across cortical layers with 16-channel silicon probes. B: Example data showing the LFP in one channel and its short-term Fourier transform during a transition from quiescence to locomotion (purple). C: Average LFP power across channels during quiescence and locomotion ( $n = 19$  mice), showing a selective power increase in the  $\gamma$  range (30-80Hz) during locomotion (shaded area: mean  $\pm$  s.e.m., FDR corrected t-tests;  $\alpha = 0.05$ , see Supplementary Table 1). D: CBASS applied to data from V1 during locomotion. Left: Multi-channel LFP. Center: Blowup of highlighted portion from left panel (red dotted lines). Multichannel LFP was filtered in the  $\gamma$  (30-80Hz) range. Candidate events (gray bars) were selected at the trough of filtered signal in a reference channel (red). Right: Events (orange bars) whose spectral dynamics across channels are associated with locomotion are retained. E: LFP activity in the inset in panel D showing events retained by the CBASS method. F: Average field potential around  $\gamma$  events (left) and associated CSD profile (right). Events are associated with a propagation of activity from layer 4 to superficial layers followed by deep layers. G: Power of the LFP events in panel F (orange) compared to matched random event averages (gray). The average field around CBASS-detected  $\gamma$  events exhibits a significant amount of power in the  $\gamma$  range (shaded area: mean:  $\pm$  s.e.m.; FDR corrected t-tests;  $\alpha = 0.05$ , see Supplementary Table 1;  $n = 19$  mice). H: LFP power when  $\gamma$  event rate is high (upper quintile; orange) and when it is low (lower four quintiles; gray). The power of  $\gamma$  events sums up in LFP power (shaded area: mean:  $\pm$  s.e.m.; FDR corrected t-tests;  $\alpha = 0.05$ , see Supplementary Table 1;  $n = 19$  mice). I: Rate of CBASS-detected  $\gamma$  events around locomotion onset (shaded area: mean:  $\pm$  s.e.m.,  $n = 19$  mice). J: Event rate increases during locomotion (t-test;  $p = 8.26 \times 10^{-11}$ ;  $n = 17$  mice).

A specific increase in  $\gamma$  power is observed in mouse V1 during locomotion<sup>7-9</sup> (Fig. 1A-C), providing a well-defined context in which to examine discrete, high-frequency cortical network events in behaving animals. CBASS-detected  $\gamma$  events occurred at a sustained rate in awake mice, suggesting that they are integral to awake cortical activity and coincide with propagation of activation from layer 4 to layers 2-3 and 5 (Fig. 1D-E)<sup>10,11</sup>. Detected events held considerable energy in the  $\gamma$  range (Fig. 1G) and their CSD profile and power were stable across behavioral states (Fig. S3). However, LFP power increased in the  $\gamma$  range during high event incidence (Fig.



1B,H) and event rate increased  $1.36 \pm 0.1$  fold during locomotion ( $n = 17$  mice; Fig. 1I-J) suggesting that V1  $\gamma$  power represents the summed energy of individual  $\gamma$  events and that

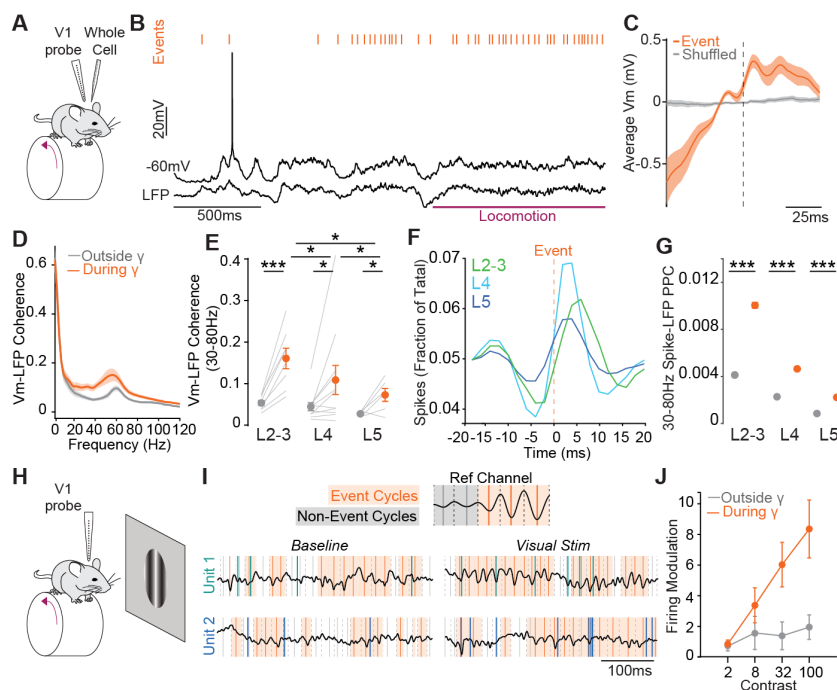

**Figure 2.** Network events regulate spike timing and enhance visual encoding. A: V1 activity is recorded from awake head-fixed mice running on a wheel using simultaneous multi-channel LFP and whole-cell patch clamp recordings. B: Example data showing the membrane potential of a Layer 4 neuron, the inverted LFP in one channel and  $\gamma$  events (orange) around locomotion onset (purple). C: Average Vm around  $\gamma$  events. D: Coherence spectra of Vm and LFP (25 neurons) during (orange) and outside (gray)  $\gamma$  event cycles (shaded area: mean  $\pm$  s.e.m.; FDR corrected t-tests;  $\alpha = 0.05$ , see Supplementary Table 1;  $n = 25$  neurons). E: Overall  $\gamma$  coherence (30-80Hz) during (orange) and outside (gray)  $\gamma$  event cycles. Vm-LFP coherence is strongest in Layer 2-3 neurons (thin line: neurons, error bars: mean  $\pm$  s.e.m., \*, \*\* and \*\*\* indicate significance with  $\alpha = 0.05$ , 0.01 and 0.001 respectively; paired t-test within layers and unpaired t-test across layers). F: Population average distribution of spikes around  $\gamma$  events for neurons in layers 2-3 (green), 4 (cyan) and 5 (dark blue). G: Overall spike-LFP  $\gamma$  Pairwise Phase Consistency (PPC) in the 30-80Hz range, during (orange) and outside (gray)  $\gamma$  event cycles for RS units in layers 2-3, 4 and 5 ( $n = 82$ , 68 and 279 units respectively; error bars: mean  $\pm$  s.e.m., \*, \*\* and \*\*\* indicate significance with  $\alpha = 0.05$ , 0.01 and 0.001 respectively; Welch t-test). H: V1 activity was recorded with multichannel silicon probes during presentation of drifting gratings centered on the probe retinotopic location. I: Upper: Schematic of the analysis of spikes occurring inside and outside  $\gamma$  events and examples unit response. Lower: Example activity of two V1 RS units before and after stimulus onset, illustrating the occurrence of visually evoked spikes during  $\gamma$  event cycles. J: The modulation of firing response to grating stimuli of increasing contrast during (orange) and outside (gray)  $\gamma$  event cycles (error bars: mean  $\pm$  s.e.m., 47 RS units, \* indicates significance with  $\alpha = 0.05$ ; paired t-test).

increased power during locomotion results from increased event rate.

In addition to  $\gamma$  associated with locomotion, mouse V1 exhibits other prominent modes of patterned activity, including robust visually evoked  $\beta$ /low  $\gamma$  oscillations<sup>11,12</sup>. In contrast to  $\gamma$  events, CBASS-detected events in the  $\beta$ /low  $\gamma$  range evoked by visual stimuli (Fig. S4A-C; hereafter referred to as  $\beta$  events) had distinct profiles (Fig. S4D-F) and  $\beta$  event rate increased  $2.54 \pm 1.31$  fold selectively during visual stimulation ( $n = 17$  mice; Fig. 4G-H).  $\beta$  and  $\gamma$  events were interleaved on a fast time scale, indicating rapid switching of non-overlapping network event processes (Fig.

S4A-D). Co-labelling between  $\gamma$  and  $\beta$  events was limited (Fig. S4E), suggesting that CBASS resolves concurring categories of band-limited events in the cortex.

To examine the impact of network events on individual neurons, we performed whole-cell patch-clamp recordings in cortical layers 2-3 to 5 of awake mice while simultaneously monitoring LFP across layers (Fig. 2A-B, Fig. S6).  $\gamma$  events occurred during depolarizations and coincided with rapid deflections of the membrane potential ( $V_m$ )<sup>14–16</sup> (Fig. 2B-C, Fig. S7B, G, L), increased  $V_m$  power across frequencies (Fig. S7C, H, L), and a selective increase in  $V_m$ -LFP coherence in the  $\gamma$  band in all layers (Fig. 2D-E, Fig. S7D, I, N).  $\gamma$  events regulated spiking, entraining firing in all layers and resulting in a marked increase in spike-LFP synchrony in both intracellular (Fig. S7E, J, O to Q) and extracellular recordings (Fig. 2F-G, Fig. S8).  $\gamma$  event-associated spikes occurred earliest in L4 and latest in L2-3 units, consistent with feedforward thalamocortical processing (Fig. 2F). Synchrony was strongest in L2-3 (Fig. 2G, Fig. S7E) and markedly stronger in fast-spiking (FS), putative inhibitory units (Fig. S8D) in good agreement with previous reports<sup>4,5,17</sup>.

Spike-LFP synchrony within  $\gamma$  event cycles increased greatly during visual stimulation (Fig. S8). Event occurrence and RS unit spiking were uncorrelated during spontaneous activity but became correlated during full-contrast gratings (Fig. S9), suggesting that visually evoked spikes occur preferentially during  $\gamma$  events. We examined the visual responses of units within and outside of  $\gamma$  event cycles (Fig. 2H-I). We found that visual stimulation evoked almost no modulation of RS unit firing outside  $\gamma$  events (Fig. 2J, Fig S10C). However, evoked firing was strongly enhanced within  $\gamma$  event cycles, regardless of behavioral state (Fig. 2J, Fig S10C, E, G). Surprisingly, there was no similar enhancement during  $\beta$  events, despite their strong modulation by visual stimulation (Fig S10A-B). Visually evoked spikes are thus selectively aggregated by  $\gamma$  events.

To examine the impact of  $\gamma$  events on visually guided behavior, we trained mice in a visual contrast detection task (Fig. 3A, Supplementary Methods) that relies on V1 (Fig. S10) and shows state-dependent performance (Fig. S11). During hit, but not miss, trials  $\gamma$  event rate exhibited a consistent upward trajectory starting after stimulus onset and before the lick response (Fig. 3, Fig. S13) and peaking around lick response onset (Fig. 3B-D, Fig. S13C,E,G). In contrast,  $\beta$  event rate was unaffected by trial outcome (Fig. S13B,D,F,H). We performed a logistic regression to predict responses using  $\gamma$  and  $\beta$  event rates in specific time windows around stimulus and lick response onsets (Fig. 3E). Prediction accuracy increased as the animal approached the time of

the lick response. Deviance increase, parameter shuffling, and coefficient values indicated that  $\gamma$ , but not  $\beta$ , rate was critical for predicting trial-by-trial behavior (Fig 3G-H, Fig. S14A-J). These results were maintained when the analysis was restricted to periods of quiescence, indicating that the  $\gamma$  event prediction of behavioral responses cannot be attributed to locomotion (Fig S14K-O).  $\gamma$  event increases and model predictions were also significant during false alarm trials (Fig S13E,G, Fig S14F-J), suggesting that  $\gamma$  events anticipate behavioral responses independent of the presence of visual stimuli or reward.

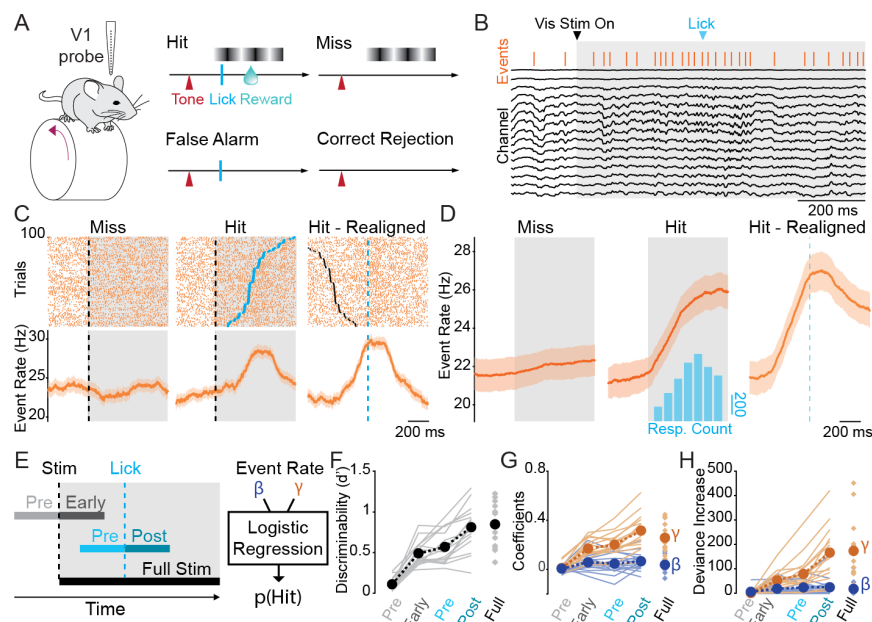

**Figure 3.** Network events predict response in a visual detection task. **A:** Head-fixed mice perform a visual detection task while V1 activity is recorded with chronically implanted silicon probes. Trial onset is signaled by a tone. If a grating stimulus is displayed, mice can lick to obtain a water reward (Hit). Lick responses made while no stimulus is present on the screen (False Alarm) lead to a time out. Absence of response to stimulus presentation (Miss) or outside stimulus presentation (Correct Rejection) produce no outcome. **B:** Example recording showing LFP,  $\gamma$  events (orange bars), visual stimulus (gray) and lick response (blue arrow) during a trial. **C:** Raster plots of  $\gamma$  event occurrence on 100 randomly selected trials (upper) and average event rate across trials (lower) aligned to stimulus (<7.5% contrast) onset during miss (left) and hit trials (center), and to lick response time (blue dotted line) on hit trials (right). (Shaded area: mean  $\pm$  s.e.m.; FDR corrected paired t-tests;  $q = 0.05$ , see Supplementary Table 1). **D:** Population average  $\gamma$  event rate during low contrast trials ( $n = 16$  mice). (FDR corrected paired t-tests;  $q = 0.05$ , see Supplementary Table 1). **E:** Schematic of analysis windows. A logistic regression of trial outcome was performed based on  $\gamma$  and  $\beta$  event rate in different windows around stimulus onset, lick response and (for rejection trials) average response time (Pre-Stim: 300ms before stimulus onset, Early-Stim: 300ms after stimulus onset, Pre-Response: 300ms before response, Post-Response: 300ms after response, Full-Stim: Full visual stimulation). **F:** The sensitivity ( $d'$ ) of the regression increases before response time and is highest right after the response (thin line: mice, thick dotted line: average across 16 mice). **G:** Model coefficients for  $\gamma$  and  $\beta$  events. **H:** Deviance increase upon parameter removal for  $\gamma$  (orange) and  $\beta$  (blue) events ( $n = 16$  mice).

To test whether the increased  $\gamma$  prior to behavioral responses represented a learned association, we trained naïve mice to collect free rewards while viewing a gray screen. We observed no significant increase in  $\gamma$  rate leading up to lick responses regardless of reward outcome (Fig. 4), suggesting that  $\gamma$  does not encode motor responses or reward signals. To

examine whether  $\gamma$  events instead represent a learned association between visual stimulus conditions and reward, we introduced the mice to a new paradigm where reward was given exclusively when the lick response occurred during visual stimulation. In this paradigm,  $\gamma$  event selectively increased leading up to lick responses to visual stimuli (Fig. 4). Plasticity of the  $\gamma$  response was rapid, appearing on the first day of the visual paradigm, and  $\gamma$  rate did not increase outside visual stimuli during unrewarded responses. To verify that plasticity of  $\gamma$  responses was bidirectional, mice were switched back to a free reward paradigm, leading to rapid loss of the association between  $\gamma$  and behavioral responses (Fig. 4).

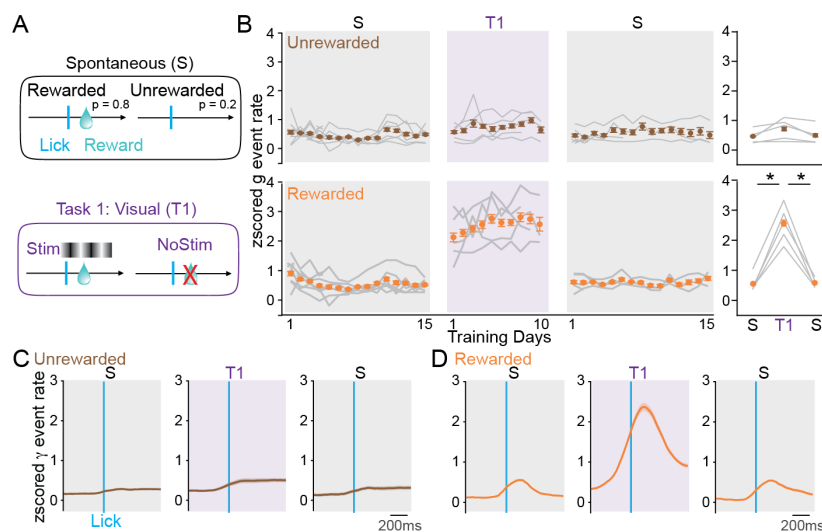

**Figure 4.** Plasticity in network events with learning. A: Schematics of trial types for Spontaneous (S) reward paradigm and Task 1 (T1). A group of mice is first trained to obtain reward freely for 15 days (S). Mice are then switched to T1, where rewards can only be collected during visual stimuli for 10 days. Mice are finally switched back to S for 15 days. B: Left: Normalized  $\gamma$  event rate around rewarded (orange) and unrewarded (brown) responses. (FDR corrected t-tests;  $\alpha = 0.05$ , see Supplementary Table 1). Right: Overall  $\gamma$  event rate at rewarded (orange) and unrewarded responses over each task block. (\* indicates significance with  $\alpha = 0.05$ ; paired t-test,  $n = 7$  mice). C: Average  $\gamma$  event rate ( $n = 7$  mice) aligned to unrewarded (brown) lick responses during trials in S and T1 paradigms. D: Average  $\gamma$  event rate ( $n = 7$  mice) aligned to rewarded (orange) lick responses during trials in S and T1 paradigms.  $\gamma$  event rate increased selectively when a correct lick response was made to a visual stimulus (shaded area: s.e.m., FDR corrected paired t-tests;  $q = 0.05$ , see Supplementary Table 1).

High-frequency activity in the  $\gamma$  range is a hallmark of arousal and attention processes<sup>8,18,19</sup>, and could simply be a nonspecific biomarker of changes in global cortical state. We therefore examined whether  $\gamma$  responses during task performance were contingent on stimulus modality. A separate cohort of mice was implanted with laminar electrodes in V1 and trained to perform an auditory detection task. In contrast to the visual task, we observed no increased  $\gamma$  leading up to responses to auditory stimuli (Fig S15), indicating that increased  $\gamma$  predictive of behavioral outcomes is modality-specific.

Overall, our findings demonstrate a novel approach for high-precision detection of discrete network events linked to state-dependent cortical activity patterns in nearby frequency bands. We

find that individual  $\gamma$  events generate transient epochs of synchrony that selectively enhance visual encoding. Using this approach, we were able for the first time to precisely track the rate of  $\gamma$  events during learning and performance of a perceptual task.  $\gamma$  rate showed a sharp increase leading up to correct behavioral responses that was rapidly plastic with associative learning and modality-specific. These results recapitulate and build upon previous findings in primate<sup>18–21</sup> and rodent<sup>6,22,23</sup> models and open new avenues to elucidate the functional dynamics of awake cortical activity.



## Figure Legends

### Figure 1. CBASS links global state-dependent changes in activity to defined network events.

**A:** Mice were head-fixed on a wheel and V1 activity was recorded across cortical layers with 16-channel silicon probes. **B:** Example data showing the one LFP channel and its short-time Fourier transform during a transition from quiescence to locomotion (purple). **C:** Average LFP power across channels ( $n = 19$  mice), showing a selective power increase in the  $\gamma$  range (30-80Hz) during locomotion (shaded area: mean  $\pm$  s.e.m., FDR corrected t-tests;  $\alpha = 0.05$ , see Supplementary Table 1). **D:** CBASS applied to data from V1 during locomotion. *Left:* Multi-channel LFP. *Center:* Blowup of highlighted portion from left panel (red dotted lines). Multichannel LFP was filtered in the  $\gamma$  (30-80Hz) range. Candidate events (gray bars) were selected at the trough of filtered signal in a reference channel (red). *Right:* Events (orange bars) whose spectral dynamics across channels are associated with locomotion are retained. **E:** LFP activity in the inset in panel D showing events retained by CBASS. **F:** Average field potential around  $\gamma$  events (left) and associated CSD profile (right). Events are associated with a propagation of activity from layer 4 to superficial layers followed by deep layers. **G:** Power of the LFP events in F (orange) compared to matched random event averages (gray). The average field around CBASS-detected  $\gamma$  events exhibits substantial power in the  $\gamma$  range (shaded area: mean:  $\pm$  s.e.m.; FDR corrected t-tests;  $\alpha = 0.05$ , see Supplementary Table 1;  $n = 19$  mice). **H:** LFP power during high (upper quintile; orange) and low (lower four quintiles; gray)  $\gamma$  event rate (shaded area: mean  $\pm$  s.e.m.; FDR corrected t-tests;  $\alpha = 0.05$ , see Supplementary Table 1; 19 mice). **I:** Rate of CBASS-detected  $\gamma$  events around locomotion onset (shaded area: mean  $\pm$  s.e.m.,  $n = 19$  mice). **J:** Event rate increases during locomotion (t-test;  $p = 8.26 \times 10^{-11}$ ;  $n = 17$  mice).

### Figure 2. Network events regulate spike timing and enhance visual encoding.

**A:** V1 activity is recorded from awake head-fixed mice running on a wheel using simultaneous multi-channel LFP and whole-cell patch clamp recordings. **B:** Membrane potential of a Layer 4 neuron, inverted LFP in one channel and  $\gamma$  events (orange) around locomotion onset (purple). **C:** Average  $V_m$  around  $\gamma$  events. **D:** Coherence spectra of  $V_m$  and LFP (25 neurons) during (orange) and outside (gray)  $\gamma$  event cycles (shaded area: mean:  $\pm$  s.e.m., 25 neurons). **E:** Overall  $\gamma$  coherence (30-80Hz) during (orange) and outside (gray)  $\gamma$  event cycles.  $V_m$ -LFP coherence is strongest in Layer 2-3 neurons (thin line: neurons, error bars: mean  $\pm$  s.e.m., \* and \*\*\* indicate significance with  $\alpha \leq 0.05$ , and 0.001 respectively; paired t-test within layers and unpaired t-test across layers). **F:** Population average distribution of spikes around  $\gamma$  events for neurons in layers 2-3 (green), 4 (cyan) and 5 (dark blue). **G:** Overall spike-LFP  $\gamma$  Pairwise Phase Consistency (PPC) in

the 30-80Hz range, during (orange) and outside (gray)  $\gamma$  event cycles for RS units in layers 2-3, 4 and 5 (82, 68 and 279 units respectively; error bars: mean  $\pm$  s.e.m., \*\*\* indicates significance with  $\alpha \leq 0.001$ ; Welch t-test). **H**: V1 activity was recorded with multichannel silicon probes during presentation of drifting gratings centered on the probe retinotopic location. **I**: Upper: Schematic of the analysis of spikes occurring inside and outside  $\gamma$  events. Lower: Example activity of two V1 RS units before and after stimulus onset, illustrating the occurrence of visually evoked spikes during  $\gamma$  event cycles. **J**. The modulation of firing response to grating stimuli of increasing contrast during (orange) and outside (gray)  $\gamma$  event cycles (error bars: mean  $\pm$  s.e.m., 47 RS units).

**Figure 3. Network events predict behavioral response in a visual detection task.** **A**: Head-fixed mice perform a visual detection task while V1 activity is recorded with chronically implanted silicon probes. Trial onset is signaled by a tone. If a grating stimulus is displayed, mice can lick to obtain a water reward (Hit). Lick responses made while no stimulus is present on the screen (False Alarm) lead to a time out. Absence of response to stimulus presentation (Miss) or outside stimulus presentation (Correct Rejection) produce no outcome. **B**: Example recording showing LFP,  $\gamma$  events (orange bars), visual stimulus (gray) and lick response (blue arrow) during a trial. **C**: Raster plots of  $\gamma$  event occurrence on 100 randomly selected trials (upper) and average event rate across trials (lower) aligned to stimulus ( $<7.5\%$  contrast) onset during miss (left) and hit trials (center), and to lick response time (blue dotted line) on hit trials (right). (Shaded area: mean  $\pm$  s.e.m., black bar). **D**: Population average  $\gamma$  event rate during low contrast trials ( $n = 16$  mice). **E**: Schematic of analysis windows. A logistic regression of trial outcome was performed based on  $\gamma$  and  $\beta$  event rate in different windows around stimulus onset, lick response and (for rejection trials) average response time (Pre-Stim: 300ms before stimulus onset, Early-Stim: 300ms after stimulus onset, Pre-Response: 300ms before response, Post-Response: 300ms after response, Full-Stim: Full visual stimulation). **F**: The sensitivity ( $d'$ ) of the regression increases before response time and is highest right after the response (thin line: mice, thick dotted line: average across 16 mice). **G**: Model coefficients for  $\gamma$  and  $\beta$  events. **H**: Deviance increase upon parameter removal for  $\gamma$  (orange) and  $\beta$  (blue) events ( $n = 16$  mice).

**Figure 4. Plasticity in network events with learning.** **A**: Schematics of trial types for Spontaneous (S) reward paradigm and Task 1 (T1). A group of mice is first trained to obtain reward freely for 15 days (S). Mice are then switched to T1, where rewards can only be collected during visual stimuli for 10 days. Mice are finally switched back to S for 15 days. **B**: Left:

Normalized  $\gamma$  event rate around rewarded (orange) and unrewarded (brown) responses. (FDR corrected t-tests;  $\alpha = 0.05$ , see Supplementary Table 1). Right: Overall  $\gamma$  event rate at rewarded (orange) and unrewarded responses over each task block. (\* indicates significance with  $\alpha = 0.05$ ; paired t-test,  $n = 7$  mice). **C**: Average  $\gamma$  event rate ( $n = 7$  mice) aligned to unrewarded (brown) lick responses during trials in S and T1 paradigms. **D**: Average  $\gamma$  event rate ( $n = 7$  mice) aligned to rewarded (orange) lick responses during trials in S and T1 paradigms.  $\gamma$  event rate increased selectively when a correct lick response was made to a visual stimulus (shaded area: s.e.m., FDR corrected paired t-tests;  $q = 0.05$ , see Supplementary Table 1).

## Supplementary Figure Legends

**Figure S1: Current source density (CSD)-based mapping of cortical layers.** Illustration of the methodology used to estimate the laminar position of LFP channels across cortical layers. The average current source density (CSD) of the response to a high-contrast drifting grating stimulus is computed and consists of a primary sink in cortical layer four (purple) and a secondary sink occurring at longer latencies in layer 5b (red). This allows for a 2-point alignment of a layer boundaries template estimated from histological data (Material & Methods).

**Figure S2: Flow diagram of the CBASS method.** CBASS links power increases in a given frequency band during a particular state to events in the temporal domain. As an example, here we look for events responsible for a well-characterized power increase in the gamma range (30-80Hz) in mouse V1 cortex during locomotion. **A:** CBASS starts with a multichannel time series (black) where the state of interest is indexed (i.e. locomotion, purple). **B:** The signal is band-pass filtered in the gamma range. Candidate events (gray bars) are taken at the trough of the filtered signal in a reference channel (red). Here the reference channel is taken as the closest to Layer 4. Different choices of reference channels produce qualitatively similar results but with a shifted event phase (Supplementary Methods). **C:** Spectrotemporal dynamics at the time of each candidate event are parameterized using the real and imaginary part of the analytical representation of the filtered multichannel time series. **D:** Three dimensional UMAP embedding showing the cloud of candidate events in the parametric space. Events occurring during locomotion (yellow) are seemingly present in all regions of the cloud. **E:** CBASS estimates whether specific spectrotemporal activity profiles (i.e. regions of the cloud) occur preferentially during locomotion. The cloud is partitioned randomly, and a binomial test is performed in each partition to test if the occurrence of locomotion is higher than overall. This operation is repeated  $n$  times. **F:** An enrichment score is derived for each candidate event as the fraction of time they fell into an enriched partition. This score is stronger in regions of the cloud (i.e. spectrotemporal profiles) associated with a stronger occurrence of locomotion. **G:** CBASS finds the threshold of the enrichment score that produces the most significant separation in the parametric space. **H:** Events whose enrichment score is above the threshold are retained (orange) and noted in the raw data from panel A.

**Figure S3: The dynamics of  $\gamma$  events remain consistent across behavioral states.** **A:** Average field potential around  $\gamma$  events (Upper), associated CSD activity (Middle), and power of

the average event field (orange) during quiescence. **B**: Same, during high contrast visual stimulation. **C**: Same, during locomotion.

**Figure S4: 1. CBASS links V1 beta power increase during visual stimulation to defined network events**

**A**: Mice are head-fixed on a wheel and V1 activity is recorded across cortical layers with 16-channel silicon probes. **B**: Example data showing the LFP in one channel and its short-term Fourier transform during the presentation of a full contrast visual stimulus (yellow). **C**: Average LFP power across channels during quiescence and visual stimulation (19 mice). Visual stimuli evoke increased power in the  $\beta$  range (15-30Hz). **D**: Average field potential around  $\beta$  events and associated CSD activity. Events are associated with an activation of layers 2-3 and 4 followed by an activation of deep layers. **E**: Power of the average LFP event in **D** (blue) compared to matched random averages (gray). The average LFP around detected events holds a significant amount of power in the  $\beta$  range. **F**: Power of the LFP when  $\beta$  event rate is high (upper quintile; blue) and when it is low (lower four quintiles; gray). The power of  $\beta$  events sums up in LFP power. **G**: Event rate around visual stimulation onset (Shaded area: mean  $\pm$  s.e.m., n = 19 mice). **J**:  $\beta$  event rate increases during visual stimulation (paired t-test, n = 19 mice).

**Figure S5:  $\gamma$  and  $\beta$  events identified by CBASS represent distinct processes.**

**A**: Example recording showing the local field potential in an arbitrary channel in layer 4 during epochs of locomotion and visual stimulation (Upper), its short time Fourier transform (Middle), and the rate of  $\gamma$  and  $\beta$  events within a 500ms gaussian sliding window (Lower). **B**: Enlarged sections of the gray shaded epoch in panel **A** showing the LFP in all channels together with detected  $\gamma$  and  $\beta$  events. Event types coincide with distinct dynamics and rarely overlap. **C**: Histograms of the average distribution of the inter-event interval of  $\beta$  (left, blue) and  $\gamma$  (right, orange; n = 19 mice) events. **D**: Fano factor of the inter-event interval distribution of  $\gamma$  and  $\beta$  events (n = 19 mice).  $\gamma$  and  $\beta$  events in most mice have sub-poisson dynamics, indicating that they tend to occur at regularly spaced intervals. **E**: Percent overlap between  $\gamma$  and  $\beta$  events (Gray: mice, Purple: mean  $\pm$  s.d., n = 201 sessions in 19 mice).

**Figure S6: Intrinsic properties and laminar distribution of neurons recorded using *in vivo* whole-cell and cell-attached patch-clamp recordings.**

From left to right: mean membrane potential, standard deviation of the membrane potential, firing rate, action potential amplitude and, action potential half-width of neurons plotted against recording depth. Neurons between 70 and 315 $\mu$ m were assigned to layers 2-3 (orange, 8 whole-cell, 2 cell-attached), those between 315



and 455  $\mu\text{m}$  to layer 4 (green, 11 whole-cell, 1 cell-attached) and those between 455 and 735  $\mu\text{m}$  to layer 5 (blue, 6 whole-cell, 2 cell-attached). Cell attached recordings were only used for firing rate. One cell in layer 2-3 did not fire any spontaneous action potentials and was only used for Vm activity.

**Figure S7:  $\gamma$  events synchronize the membrane potential and the firing of neurons in layers 2-3, 4 and 5.**

**A:** Example recording of a layer 2-3 neuron with  $\gamma$  events during transition from quiescence to locomotion (purple). **B:** Average membrane potential of layers 2-3 neurons around  $\gamma$  events (orange) and around randomly selected time points (gray) (Shaded area: mean  $\pm$  s.e.m., black bar: statistically significant difference; FDR corrected paired t-tests;  $q = 0.05$ ;  $n = 8$  whole-cell recordings). **C:** Power spectrum of the membrane potential of layers 2-3 neurons during (orange) or outside (gray)  $\gamma$  events. Gamma events coincide with an increase of the membrane potential power distributed across the frequency spectrum (Shaded area: mean  $\pm$  s.e.m., black bar: statistically significant difference; FDR corrected paired t-tests;  $q = 0.05$ ;  $n = 8$  whole-cell recordings). **D:** Vm-LFP coherence spectra for layers 2-3 neurons during (orange) and outside (gray)  $\gamma$  event cycles, showing selective enhancement of coherence in the  $\gamma$  range (Shaded area: mean  $\pm$  s.e.m., black bar: statistically significant difference; FDR corrected paired t-tests;  $q = 0.05$ ;  $n = 8$  whole-cell recordings). **E:** Spike-LFP synchrony spectra for layers 2-3 neurons during (orange) and outside (gray)  $\gamma$  event cycles. Spike-LFP synchrony is quantified with the Pairwise Phase Consistency (Method) and increases during  $\gamma$  event cycles (shade area: mean  $\pm$  s.e.m., black bar: statistically significant difference; FDR corrected Welch's t-tests;  $q = 0.05$ ;  $n = 11$  whole-cell/cell-attached recordings). **F, G, H, and I:** Same as A, B, C and D with an example layer 4 neuron ( $n = 11$  whole-cell recordings). **J:** Same as E for layer 4 neurons ( $n = 12$  whole-cell/cell-attached recordings). **K, L, M, and N:** Same as A, B, C and D with an example layer 5 neuron ( $n = 6$  whole-cell recordings). **O:** Same as E for layer 4 neurons ( $n = 8$  whole-cell/cell-attached recordings). **P:** Same as E for neurons pooled across layers 2-3, 4 and 5 ( $n = 30$  whole-cell/cell-attached recordings). **Q:** Overall spike-LFP gamma synchrony in the 20-45Hz range, during (orange) and outside (gray)  $\gamma$  event cycles for whole-cell and cell attached recordings in layers 2-3, 4 and 5. Synchrony is enhanced during gamma events and is strongest in Layer 2-3 and Layer 4 neurons (gray lines: neurons, error bars: mean  $\pm$  s.e.m., \*, \*\* and \*\*\* indicate significance with  $\alpha = 0.05, 0.01$  and  $0.001$  respectively; Welch t-test).

**Figure S8: Spike-LFP PPC of RS and FS units.** **A:** Spike-LFP synchrony spectra for RS units in layers 2-3 (Upper), 4 (Middle) and 5 (Lower) during (blue) and outside (gray)  $\beta$  event cycles,

during baseline (left) and full contrast visual stimulation (right). Spike-LFP synchrony is quantified with the Pairwise Phase Consistency (Method) and increases during  $\beta$  event cycles (FDR corrected Welch's t-tests;  $q = 0.05$ ). **B**: Same as A for FS units. **C** and **D**: Same as A and B during (orange) and outside (gray)  $\gamma$  event cycles. Spike LFP synchrony of RS and FS units increases during  $\gamma$  events. Synchrony in  $\gamma$  events cycles is strongest during visual stimulation for layers 2-3 FS and RS units.

**Figure S9: The firing of RS units correlates with  $\gamma$  event rates specifically during visual stimuli.** **A**: Raster plot of the number of spikes generated by an example RS unit against the number of  $\gamma$  events within 8713 200ms LFP segments recorded during baseline. **B**: Raster plot of the number of spikes generated by the same example unit against the number of  $\gamma$  events occurring in each of the 425 LFP segments recorded during high contrast visual stimulation. The spike count is correlated with the number of  $\gamma$  events during visual stimulation but not during baseline activity. **C**: and **D**: Same as panels A and B for an example FS unit (Baseline: 9577 segments, Stimulation: 429 segments). **E**: Histogram of the correlation values between spike count and  $\gamma$  event number during baseline for 59 RS units (Downward triangle and bars at the top: mean  $\pm$  S.D.). **F**: Histogram of the correlation values between spike count and  $\gamma$  event number during high contrast visual stimulation for the same units as in panel E. The correlation of RS unit spike count and  $\gamma$  event count increases significantly during high contrast visual stimulation (Downward triangle and bars at the top: mean  $\pm$  S.D.; \*, \*\* and, \*\*\* indicate statistically significant deviation from the mean at baseline with  $p < 0.05$ ,  $p < 0.01$  and,  $p < 0.001$  respectively; paired t-test). **G** and **H**: Same as E and F for 57 FS unit. **I**, **J**, **K**, and **L**: same as E, F, G and H for LFP segments occurring specifically during quiescence. **M**, **N**, **O**, and **P**: same as E, F, G and H for LFP segments occurring specifically during locomotion.

**Figure S10: The spike response of RS and FS units to visual stimulation occurs preferentially during  $\gamma$  events.** **A**: Modulation of the firing of RS units by gratings of varying spatial frequency (Left), size (Center) and contrast (Right) within (blue) and outside (gray)  $\beta$  event cycles ( $n = 47$  units). Unless otherwise noted, stimuli had a 0.04 cycle/degree spatial frequency, a 40-degree radius and were shown at 100% contrast (\*indicates statistically significant difference between modulation within and outside event cycles with  $p < 0.05$ ; paired t-test). **B**: Same as A for FS units ( $n = 31$  units). Visual feature selectivity was not strongly affected by  $\beta$  event. **C** and **D**: same as A and B for  $\gamma$  events. Firing modulation of RS and FS unit by visual stimuli was markedly stronger during  $\gamma$  events. **E**. and **F**. same as C and D exclusively during epochs of

quiescence. **E** and **F**: same as C and D exclusively during epochs of locomotion. Firing modulation by visual stimulation was stronger within  $\gamma$  event cycles across both behavioral states.

**Figure S11: V1 inactivation reduces performance in a visual contrast detection task. A:** Head-fixed PV-Cre mice injected with a AAV5-ef1 $\alpha$ -DIO-ChR2-eYFP virus in V1 (see Supplementary Methods) performed a visual detection task. Trial onset was signaled by a tone. If a visual stimulus was displayed, mice could produce a lick response to obtain a water reward (Hit). Responses made while no stimulus was present on the screen led to a time out (False Alarm). Absence of a lick response upon stimulus presentation (Miss) or outside stimulus trials (Correct Rejection) produced no outcome. On a subset of trials, blue light was delivered with an optic fiber inactivating V1 through the activation of PV interneurons. **B:** False alarm subtracted hit rate (mean  $\pm$  s.e.m.) as a function of stimulus contrast during regular trials (dark blue) and during V1 inactivation (light blue) in an example mouse. A sigmoid function is fitted to the hit rate in each condition. **C:** Population average false alarm subtracted hit rate (mean  $\pm$  s.e.m.) as function of stimulus contrast (n = 5 mice). V1 inactivation strongly reduced detection performance at low contrast. **D:** False alarm rate (FAR) and hit rate at maximum contrast (RMax) (dark blue) and during V1 inactivation (light blue). V1 inactivation does not affect the FAR but reduces RMax (gray lines: mice; error bars: mean  $\pm$  s.e.m., \*: significant with  $p < 0.05$ , paired t-test, n = 5 mice). **E:** Contrast at which the hit rate is 50% (C50) on regular trials (dark blue) and during V1 inactivation (light blue). V1 inactivation increases the C50 (gray lines: mice, error bars: mean  $\pm$  s.e.m., \*: significant with  $p < 0.05$ , paired t-test, n = 5 mice).

**Figure S12: Locomotion enhances visual detection performance and increases bias towards response in a visual contrast detection task. A:** False alarm subtracted hit rate (mean  $\pm$  s.e.m.) as a function of stimulus contrast during quiescence (gray) and locomotion (purple) in an example mouse. The hit rate is fitted with a sigmoid curve. **B:** Population average false alarm subtracted hit rate (mean  $\pm$  s.e.m.) as a function of stimulus contrast during quiescence (gray) and locomotion (purple) (n = 16 mice). **C:** Contrast yielding 50% chance of response (C50) during quiescence (gray) and locomotion (purple). Locomotion is accompanied with a decreased C50 (gray lines: mice, error bars: mean  $\pm$  s.e.m.). **D:** False alarm rate (FAR), hit rate across contrasts and hit rate at full contrast during quiescence (gray) and locomotion (purple). Locomotion is accompanied with increased hit and false alarm rates (gray lines: mice, error bars: mean  $\pm$  s.e.m.). **E:** Sensitivity ( $d'$ ) of the response across contrast and at full contrast during quiescence (gray) and locomotion (purple). Locomotion has a small but significant effect on the sensitivity across

contrast (gray lines: mice, error bars: mean  $\pm$  s.e.m.). **F**: Bias of the response across all contrasts and at 100% contrast during quiescence (gray) and locomotion (purple). Locomotion significantly biases behavior towards responses (gray lines: mice, error bars: mean  $\pm$  s.e.m., \*: significant with  $p < 0.05$ , paired t-test,  $n = 16$  mice).

**Figure S13: Selective increase in  $\gamma$ , but not  $\beta$ , events prior to behavioral response in a visual detection task.** **A**: Head-fixed mice perform a visual contrast detection task while V1 activity is recorded with chronically implanted silicon probes (see Fig. 3). Trial onset is signaled by a tone. If a visual stimulus is displayed, mice can produce a lick response to obtain a water reward (Hit). Responses made while no stimulus is present on the screen lead to a time out (False Alarm, FA). Absence of a lick response on stimulus presentation (Miss) or outside stimulus presentation (Correct Rejection) produce no outcome. **B**: Average  $\beta$  event rate across 16 mice during low contrast trials ( $< 7.5\%$ ). Event rate is aligned to stimulus onset during miss (left) and hit trials (middle), and to response time on hit trial (complementary to Fig. 3D).  $\beta$  event occurrence is not significantly higher on hit trials (shaded area: mean  $\pm$  s.e.m., gray box: time of visual stimulus presentation; FDR corrected paired t-tests;  $q = 0.05$ ). **C**: Same as panel B for  $\gamma$  events during high contrast ( $> 10\%$ ) trials. **D**: Same as panel C for  $\beta$  events. **E**:  $\gamma$  event rates during 0% contrast (no go) trials.  $\gamma$  event occurrence is higher on FA trials than on correct rejections and aligns best to response onset (gray box: time when visual stimulus becomes possible; FDR corrected paired t-tests;  $q = 0.05$ ). **F**: Same as panel E for  $\beta$  events.  $\beta$  event occurrence is not significantly higher during FA trials. **G**: Rate of  $\gamma$  event at in the 300ms following response or average response time (rejections) for trials with stimuli of increasing contrasts, across all behavioral states (Left), during locomotion (Center) and during quiescence (Right). The rate of  $\gamma$  events is significantly higher at response than during rejection across contrasts, except during locomotion (thin lines: mice, error bars: mean  $\pm$  s.e.m., paired t-test,  $n = 16$  mice). **H**: Same as panel G for  $\beta$  events. There is no significant difference in  $\beta$  event rate between response and rejection trials.

**Figure S14:  $\gamma$  event occurrence predicts the trial-by-trial outcome of visual detection task performance across stimulus contrasts and behavioral states.** **A**: McFadden's R-squared ( $R^2$ ) of a logistic regression of trial outcome based on  $\gamma$  and  $\beta$  event rate in different windows around stimulus onset, lick response or average response time (for rejection trials) (Pre-Stim: 300ms before stimulus onset, Early-Stim: 300ms after stimulus onset, Pre-Response: 300ms before response, Post-Response: 300ms after response, Full-Stim: Full visual stimulation, thin

line: mice, thick dotted line: average across 16 mice). **B**: Same as panel A using the sensitivity ( $d'$ ) to measure regression performance. Prediction increases before response time and is highest right after the response. **C**: Deviance increase upon parameter removal. **D**:  $R^2$  after parameter shuffling. **E**: Regression coefficients show that  $\gamma$  event occurrence has the strongest influence on model prediction (thin line: mice, thick dotted line: average across 16 mice). **F**, **G**, **H**, **I** and **J**: same as A, B, C, D and E for visual stimulation with increasing contrasts in the Post-Stimulus window. Model performance is stable across contrasts, suggesting that the predictions do not arise simply from contrast-dependent responses in  $\gamma$  or  $\beta$ . **K**, **L**, **M**, **N** and **O**: same as panels A, B, C, D and E, excluding trials where locomotion occurred at any point within 2s of trial onset. Locomotion-related increases in  $\gamma$  event occurrence thus do not account for model performance.

**Figure S15: Rate of  $\gamma$  event occurrence around response across behavioral paradigms. A:** Mice were trained on the spontaneous reward (S) task for 5 days and then switched to a task where reward can only be obtained during auditory stimuli (Task 2) for 3 days. **B:** Left: Normalized  $\gamma$  event rate around rewarded responses across training days in S and T2.  $\gamma$  event rate does not increase during auditory guided responses. Right: Overall  $\gamma$  event rate at rewarded responses over each task block (n= 4 mice). **C:** Average  $\gamma$  event rate (during trials with rewarded lick responses during S and T2 paradigms.  $\gamma$  event rate in V1 did not increase on correct auditory detection trials.



### **Author Contributions**

QP and JAC designed the experiments. QP and AF developed and validated the CBASS method. QP, AA, JB, and RM collected the data. QP analyzed the data. QP and JAC wrote the manuscript.

### **Acknowledgements**

The authors thank Drs. Michael J. Higley and Daeyeol Lee for extensive discussions of the data and manuscript and all members of the Cardin and Higley laboratories for helpful input throughout all stages of this study. This work was supported by funding from the NIH (EY022951 and MH113852 to JAC, EY026878 to the Yale Vision Core), a McKnight Scholar Award (to JAC), an award from the Kavli Institute of Neuroscience (to JAC), and a BBRF Young Investigator Grant (to QP).

### **Conflicts of Interest**

The authors declare no conflicts of interest exist.

### **Data Availability Statement**

The full datasets generated and analyzed in this study are available from the corresponding authors on reasonable request.

### **Code Availability Statement**

Custom written MATLAB and Python scripts used in this study are available at <https://github.com/cardin-higley-lab/CBASS>.

## References

1. *The Neocortex*. (MIT Press, 2019).
2. Buzsáki, G. *Rhythms of the Brain*. (Oxford University Press, 2006).
3. Buzsáki, G., Anastassiou, C. A. & Koch, C. The origin of extracellular fields and currents — EEG, ECoG, LFP and spikes. *Nat Rev Neurosci* **13**, 407–420 (2012).
4. Cardin, J. A. *et al.* Driving fast-spiking cells induces gamma rhythm and controls sensory responses. *Nature* **459**, 663–667 (2009).
5. Sohal, V. S., Zhang, F., Yizhar, O. & Deisseroth, K. Parvalbumin neurons and gamma rhythms enhance cortical circuit performance. *Nature* **459**, 698–702 (2009).
6. Shin, H. & Moore, C. I. Persistent Gamma Spiking in SI Nonsensory Fast Spiking Cells Predicts Perceptual Success. *Neuron* **0**, (2019).
7. Niell, C. M. & Stryker, M. P. Modulation of visual responses by behavioral state in mouse visual cortex. *Neuron* **65**, 472–479 (2010).
8. Vinck, M., Batista-Brito, R., Knoblich, U. & Cardin, J. A. Arousal and locomotion make distinct contributions to cortical activity patterns and visual encoding. *Neuron* **86**, 740–754 (2015).
9. Senzai, Y., Fernandez-Ruiz, A. & Buzsáki, G. Layer-Specific Physiological Features and Interlaminar Interactions in the Primary Visual Cortex of the Mouse. *Neuron* **0**, (2019).
10. Gabernet, L., Jadhav, S. P., Feldman, D. E., Carandini, M. & Scanziani, M. Somatosensory integration controlled by dynamic thalamocortical feed-forward inhibition. *Neuron* **48**, 315–327 (2005).
11. Cruikshank, S. J., Urabe, H., Nurmikko, A. V. & Connors, B. W. Pathway-specific feedforward circuits between thalamus and neocortex revealed by selective optical stimulation of axons. *Neuron* **65**, 230–245 (2010).
12. Chen, G. *et al.* Distinct Inhibitory Circuits Orchestrate Cortical beta and gamma Band Oscillations. *Neuron* **96**, 1403-1418.e6 (2017).
13. Veit, J., Hakim, R., Jadi, M. P., Sejnowski, T. J. & Adesnik, H. Cortical gamma band synchronization through somatostatin interneurons. *Nat. Neurosci.* **20**, 951–959 (2017).
14. Perrenoud, Q., Pennartz, C. M. A. & Gentet, L. J. Membrane Potential Dynamics of Spontaneous and Visually Evoked Gamma Activity in V1 of Awake Mice. *PLoS Biol.* **14**, e1002383 (2016).
15. Hasenstaub, A. *et al.* Inhibitory postsynaptic potentials carry synchronized frequency information in active cortical networks. *Neuron* **47**, 423–435 (2005).
16. Adesnik, H. & Scanziani, M. Lateral competition for cortical space by layer-specific horizontal circuits. *Nature* **464**, 1155–1160 (2010).
17. Buffalo, E. A., Fries, P., Landman, R., Buschman, T. J. & Desimone, R. Laminar differences in gamma and alpha coherence in the ventral stream. *Proc. Natl. Acad. Sci. U.S.A.* **108**, 11262–11267 (2011).
18. Fries, P., Reynolds, J. H., Rorie, A. E. & Desimone, R. Modulation of oscillatory neuronal synchronization by selective visual attention. *Science* **291**, 1560–1563 (2001).
19. Bosman, C. A. *et al.* Attentional stimulus selection through selective synchronization between monkey visual areas. *Neuron* **75**, 875–888 (2012).
20. Womelsdorf, T. *et al.* Orientation selectivity and noise correlation in awake monkey area V1 are modulated by the gamma cycle. *Proc. Natl. Acad. Sci. U.S.A.* **109**, 4302–4307 (2012).
21. Jia, X., Xing, D. & Kohn, A. No consistent relationship between gamma power and peak frequency in macaque primary visual cortex. *J. Neurosci.* **33**, 17–25 (2013).
22. Siegle, J. H., Pritchett, D. L. & Moore, C. I. Gamma-range synchronization of fast-spiking interneurons can enhance detection of tactile stimuli. *Nat. Neurosci.* **17**, 1371–1379 (2014).
23. Speed, A., Del Rosario, J., Burgess, C. P. & Haider, B. Cortical State Fluctuations across Layers of V1 during Visual Spatial Perception. *Cell Reports* **26**, 2868-2874.e3 (2019).

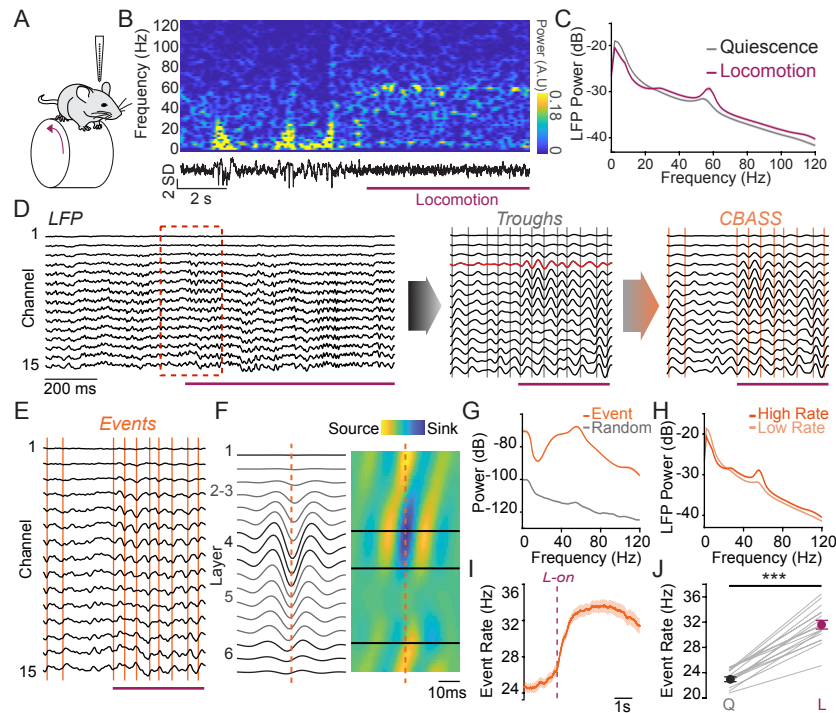

**Figure 1.** CBASS links global state-dependent changes in activity to defined network events. **A:** Mice were head-fixed on a wheel and V1 activity was recorded across cortical layers with 16-channel silicon probes. **B:** Example data showing the LFP in one channel and its short-term Fourier transform during a transition from quiescence to locomotion (purple). **C:** Average LFP power across channels during quiescence and locomotion ( $n = 19$  mice), showing a selective power increase in the  $\gamma$  range (30-80Hz) during locomotion (shaded area: mean  $\pm$  s.e.m., FDR corrected t-tests;  $\alpha = 0.05$ , see Supplementary Table 1). **D:** CBASS applied to data from V1 during locomotion. Left: Multi-channel LFP. Center: Blowup of highlighted portion from left panel (red dotted lines). Multichannel LFP was filtered in the  $\gamma$  (30-80Hz) range. Candidate events (gray bars) were selected at the trough of filtered signal in a reference channel (red). Right: Events (orange bars) whose spectral dynamics across channels are associated with locomotion are retained. **E:** LFP activity in the inset in panel D showing events retained by the CBASS method. **F:** Average field potential around  $\gamma$  events (left) and associated CSD profile (right). Events are associated with a propagation of activity from layer 4 to superficial layers followed by deep layers. **G:** Power of the LFP events in panel F (orange) compared to matched random event averages (gray). The average field around CBASS-detected  $\gamma$  events exhibits a significant amount of power in the  $\gamma$  range (shaded area: mean:  $\pm$  s.e.m.; FDR corrected t-tests;  $\alpha = 0.05$ , see Supplementary Table 1;  $n = 19$  mice). **H:** LFP power when  $\gamma$  event rate is high (upper quintile; orange) and when it is low (lower four quintiles; gray). The power of  $\gamma$  events sums up in LFP power (shaded area: mean:  $\pm$  s.e.m.; FDR corrected t-tests;  $\alpha = 0.05$ , see Supplementary Table 1;  $n = 19$  mice). **I:** Rate of CBASS-detected  $\gamma$  events around locomotion onset (shaded area: mean:  $\pm$  s.e.m.,  $n = 19$  mice). **J:** Event rate increases during locomotion (t-test;  $p = 8.26 \times 10^{-11}$ ;  $n = 17$  mice).

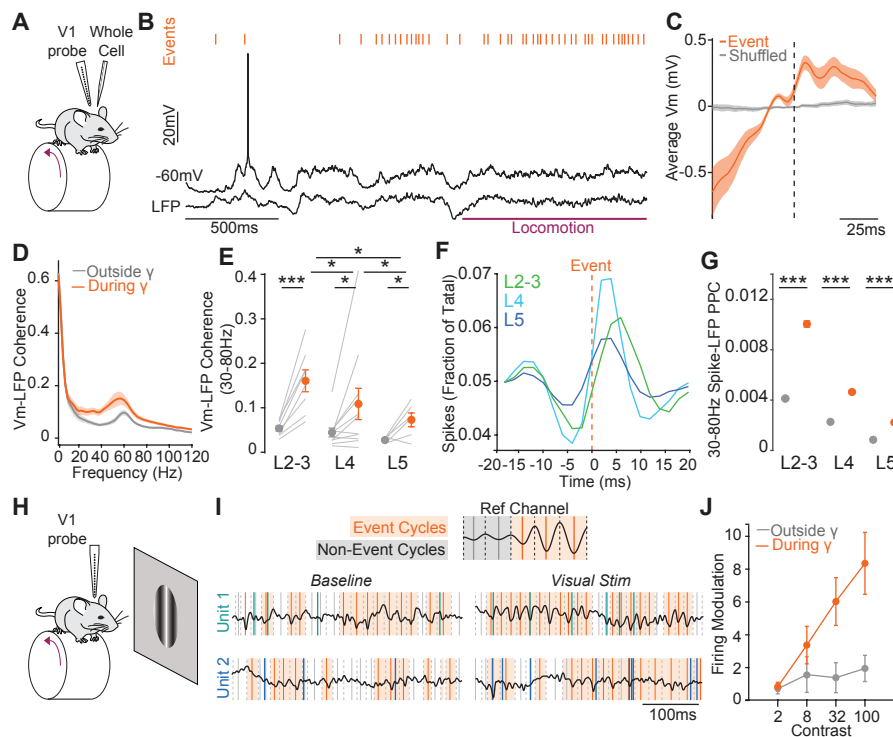

**Figure 2.** Network events regulate spike timing and enhance visual encoding. A: V1 activity is recorded from awake head-fixed mice running on a wheel using simultaneous multi-channel LFP and whole-cell patch clamp recordings. B: Example data showing the membrane potential of a Layer 4 neuron, the inverted LFP in one channel and  $\gamma$  events (orange) around locomotion onset (purple). C: Average Vm around  $\gamma$  events. D: Coherence spectra of Vm and LFP (25 neurons) during (orange) and outside (gray)  $\gamma$  event cycles (shaded area: mean:  $\pm$  s.e.m.; FDR corrected t-tests;  $\alpha = 0.05$ , see Supplementary Table 1;  $n = 25$  neurons). E: Overall  $\gamma$  coherence (30-80Hz) during (orange) and outside (gray)  $\gamma$  event cycles. Vm-LFP coherence is strongest in Layer 2-3 neurons (thin line: neurons, error bars: mean  $\pm$  s.e.m., \*, \*\* and \*\*\* indicate significance with  $\alpha = 0.05$ , 0.01 and 0.001 respectively; paired t-test within layers and unpaired t-test across layers). F: Population average distribution of spikes around  $\gamma$  events for neurons in layers 2-3 (green), 4 (cyan) and 5 (dark blue). G: Overall spike-LFP Pairwise Phase Consistency (PPC) in the 30-80Hz range, during (orange) and outside (gray)  $\gamma$  event cycles for RS units in layers 2-3, 4 and 5 ( $n = 82$ , 68 and 279 units respectively; error bars: mean  $\pm$  s.e.m., \*, \*\* and \*\*\* indicate significance with  $\alpha = 0.05$ , 0.01 and 0.001 respectively; Welch t-test). H: V1 activity was recorded with multichannel silicon probes during presentation of drifting gratings centered on the probe retinotopic location. I: Upper: Schematic of the analysis of spikes occurring inside and outside  $\gamma$  events and examples unit response. Lower: Example activity of two V1 RS units before and after stimulus onset, illustrating the occurrence of visually evoked spikes during  $\gamma$  event cycles. J: The modulation of firing response to grating stimuli of increasing contrast during (orange) and outside (gray)  $\gamma$  event cycles (error bars: mean  $\pm$  s.e.m., 47 RS units; \* indicates significance with  $\alpha = 0.05$ ; paired t-test).

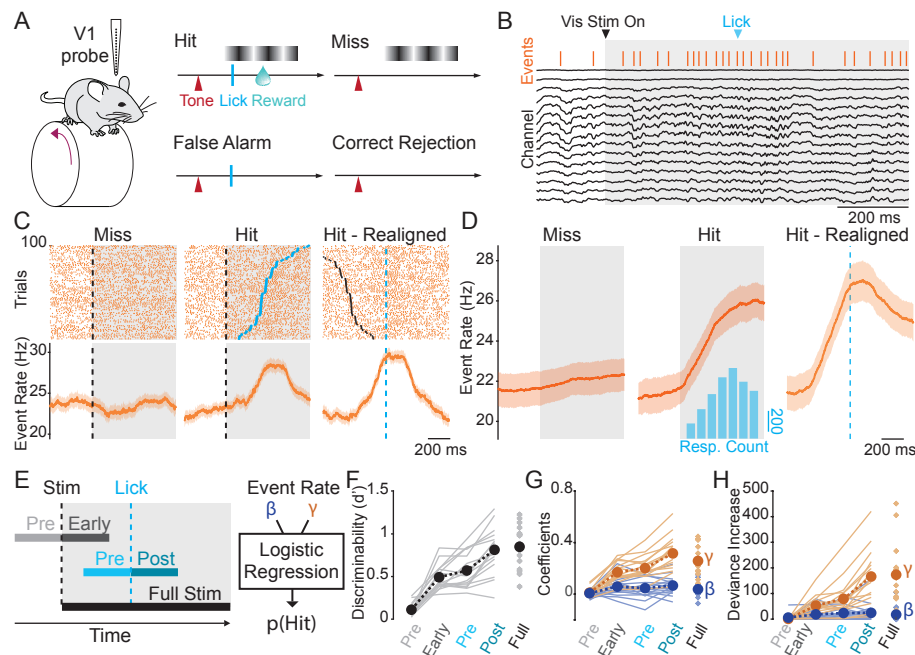

**Figure 3.** Network events predict response in a visual detection task. **A:** Head-fixed mice perform a visual detection task while V1 activity is recorded with chronically implanted silicon probes. Trial onset is signaled by a tone. If a grating stimulus is displayed, mice can lick to obtain a water reward (Hit). Lick responses made while no stimulus is present on the screen (False Alarm) lead to a time out. Absence of response to stimulus presentation (Miss) or outside stimulus presentation (Correct Rejection) produce no outcome. **B:** Example recording showing LFP,  $\gamma$  events (orange bars), visual stimulus (gray) and lick response (blue arrow) during a trial. **C:** Raster plots of  $\gamma$  event occurrence on 100 randomly selected trials (upper) and average event rate across trials (lower) aligned to stimulus (<7.5% contrast) onset during miss (left) and hit trials (center), and to lick response time (blue dotted line) on hit trials (right). (Shaded area: mean  $\pm$  s.e.m.; FDR corrected paired t-tests;  $q = 0.05$ , see Supplementary Table 1). **D:** Population average  $\gamma$  event rate during low contrast trials ( $n = 16$  mice). (FDR corrected paired t-tests;  $q = 0.05$ , see Supplementary Table 1). **E:** Schematic of analysis windows. A logistic regression of trial outcome was performed based on  $\gamma$  and  $\beta$  event rate in different windows around stimulus onset, lick response and (for rejection trials) average response time (Pre-Stim: 300ms before stimulus onset, Early-Stim: 300ms after stimulus onset, Pre-Response: 300ms before response, Post-Response: 300ms after response, Full-Stim: Full visual stimulation). **F:** The sensitivity ( $d'$ ) of the regression increases before response time and is highest right after the response (thin line: mice, thick dotted line: average across 16 mice). **G:** Model coefficients for  $\gamma$  and  $\beta$  events. **H:** Deviance increase upon parameter removal for  $\gamma$  (orange) and  $\beta$  (blue) events ( $n = 16$  mice).



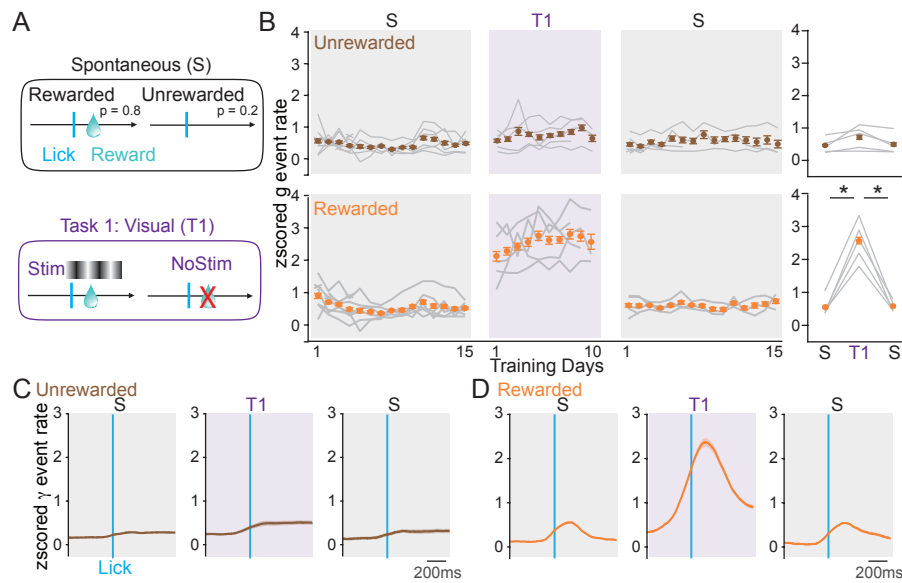

**Figure 4.** Plasticity in network events with learning. **A:** Schematics of trial types for Spontaneous (S) reward paradigm and Task 1 (T1). A group of mice is first trained to obtain reward freely for 15 days (S). Mice are then switched to T1, where rewards can only be collected during visual stimuli for 10 days. Mice are finally switched back to S for 15 days. **B:** Left: Normalized  $\gamma$  event rate around rewarded (orange) and unrewarded (brown) responses. (FDR corrected t-tests;  $\alpha = 0.05$ , see Supplementary Table 1). Right: Overall  $\gamma$  event rate at rewarded (orange) and unrewarded responses over each task block. (\* indicates significance with  $\alpha = 0.05$ ; paired t-test,  $n = 7$  mice). **C:** Average  $\gamma$  event rate ( $n = 7$  mice) aligned to unrewarded (brown) lick responses during trials in S and T1 paradigms. **D:** Average  $\gamma$  event rate ( $n = 7$  mice) aligned to rewarded (orange) lick responses during trials in S and T1 paradigms.  $\gamma$  event rate increased selectively when a correct lick response was made to a visual stimulus (shaded area: s.e.m., FDR corrected paired t-tests;  $q = 0.05$ , see Supplementary Table 1).

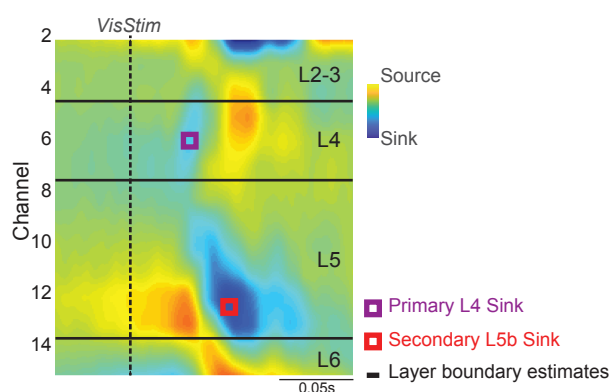

**Figure S1:** Current source density (CSD)-based mapping of cortical layers. Illustration of the methodology used to estimate the laminar position of LFP channels across cortical layers. The average current source density (CSD) of the response to a high-contrast drifting grating stimulus is computed and consists of a primary sink in cortical layer four (purple) and a secondary sink occurring at longer latencies in layer 5b (red). This allows for a 2-point alignment of a layer boundaries template estimated from histological data (Material & Methods).

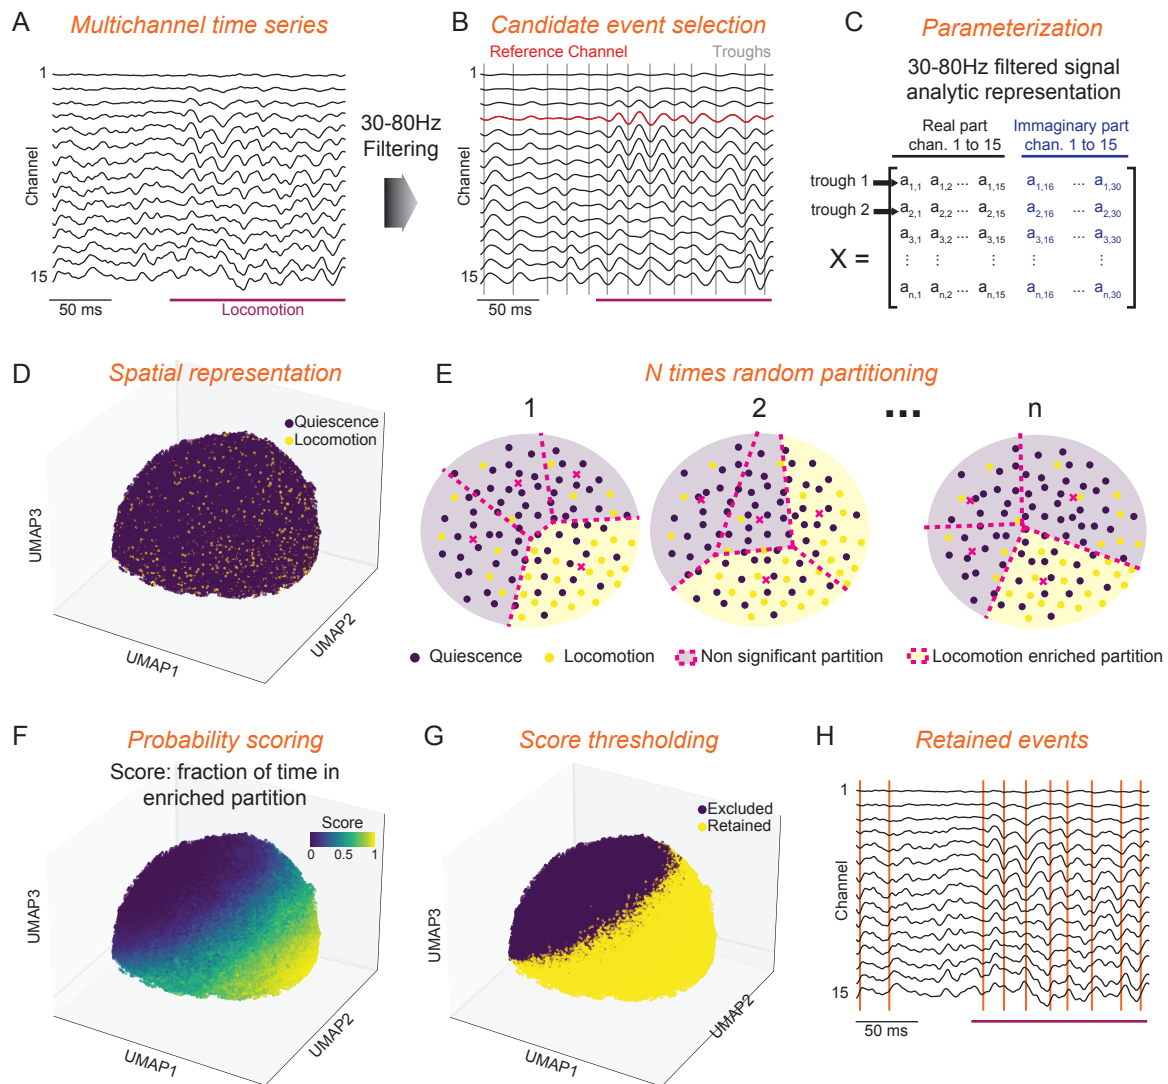

**Figure S2:** Flow diagram of the CBASS method. CBASS links power increases in a given frequency band during a particular state to events in the temporal domain. As an example, here we look for events responsible for a well-characterized power increase in the gamma range (30-80Hz) in mouse V1 cortex during locomotion. **A:** CBASS starts with a multichannel time series (black) where the state of interest is indexed (i.e. locomotion, purple). **B:** The signal is band-pass filtered in the gamma range. Candidate events (gray bars) are taken at the trough of the filtered signal in a reference channel (red). Here the reference channel is taken as the closest to Layer 4. Different choices of reference channels produce qualitatively similar results but with a shifted event phase (Supplementary Methods). **C:** Spectrotemporal dynamics at the time of each candidate event are parameterized using the real and imaginary part of the analytical representation of the filtered multichannel time series. **D:** Three dimensional UMAP embedding showing the cloud of candidate events in the parametric space. Events occurring during locomotion (yellow) are seemingly present in all regions of the cloud. **E:** CBASS estimates whether specific spectrotemporal activity profiles (i.e. regions of the cloud) occur preferentially during locomotion. The cloud is partitioned randomly, and a binomial test is performed in each partition to test if the occurrence of locomotion is higher than overall. This operation is repeated  $n$  times. **F:** An enrichment score is derived for each candidate event as the fraction of time they fell into an enriched partition. This score is stronger in regions of the cloud (i.e. spectrotemporal profiles) associated with a stronger occurrence of locomotion. **G:** CBASS finds the threshold of the enrichment score that produces the most significant separation in the parametric space. **H:** Events whose enrichment score is above the threshold are retained (orange) and noted in the raw data from panel A.

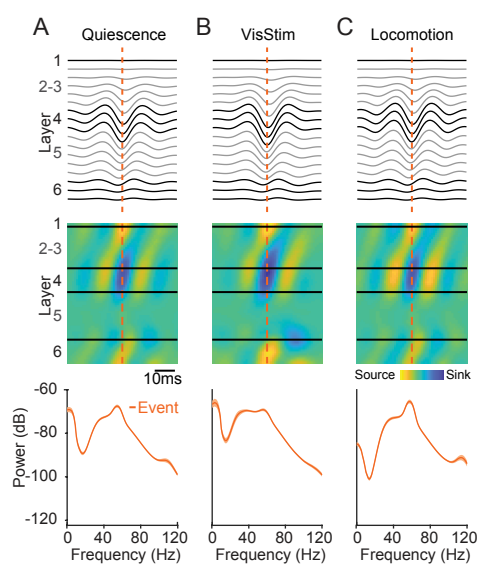

**Figure S3:** The dynamics of  $\gamma$  events remain consistent across behavioral states. A: Average field potential around  $\gamma$  events (Upper), associated CSD activity (Middle), and power of the average event field (orange) during quiescence. B: Same, during high contrast visual stimulation. C: Same, during locomotion.

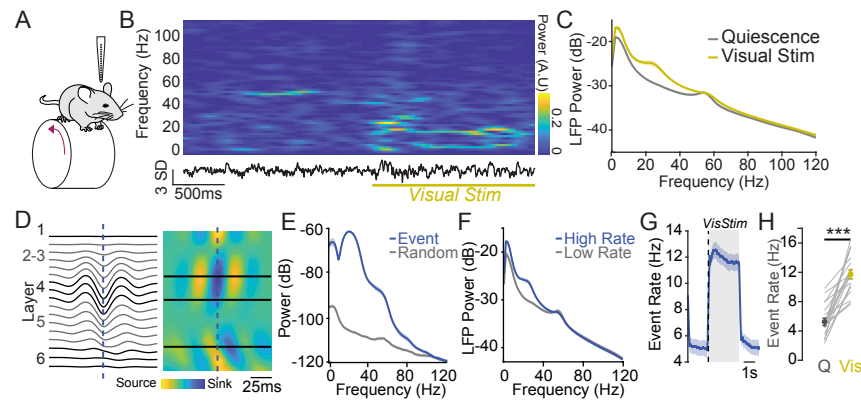

**Figure S4:** CBASS links V1 beta power increase during visual stimulation to defined network events A: Mice are head-fixed on a wheel and V1 activity is recorded across cortical layers with 16-channel silicon probes. B: Example data showing the LFP in one channel and its short-term Fourier transform during the presentation of a full contrast visual stimulus (yellow). C: Average LFP power across channels during quiescence and visual stimulation (19 mice). Visual stimuli evoke increased power in the  $\beta$  range (15-30Hz). D: Average field potential around  $\beta$  events and associated CSD activity. Events are associated with an activation of layers 2-3 and 4 followed by an activation of deep layers. E: Power of the average LFP event in D (blue) compared to matched random averages (gray). The average LFP around detected events holds a significant amount of power in the  $\beta$  range. F: Power of the LFP when  $\beta$  event rate is high (upper quintile; blue) and when it is low (lower four quintiles; gray). The power of  $\beta$  events sums up in LFP power. G: Event rate around visual stimulation onset (Shaded area: mean  $\pm$  s.e.m., n = 19 mice). J:  $\beta$  event rate increases during visual stimulation (paired t-test, n = 19 mice).

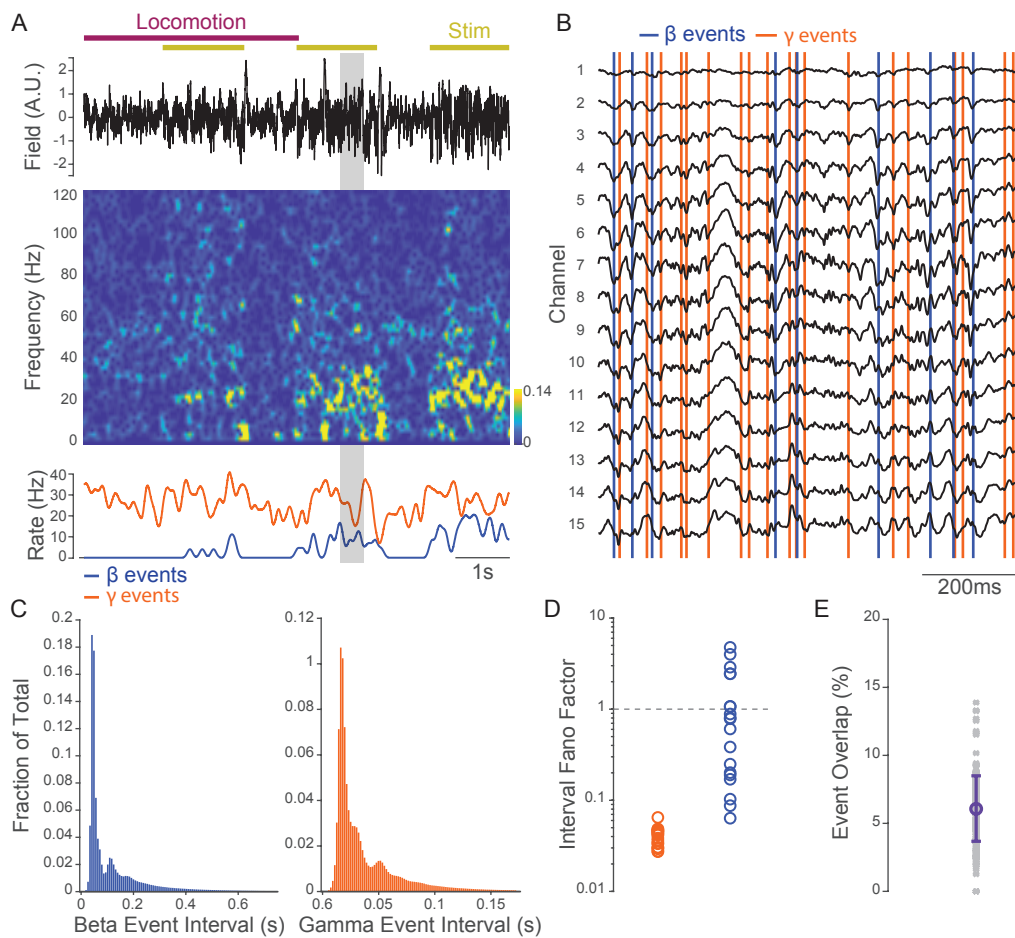

**Figure S5:**  $\gamma$  and  $\beta$  events identified by CBASS represent distinct processes. A: Example recording showing the local field potential in an arbitrary channel in layer 4 during epochs of locomotion and visual stimulation (Upper), its short time Fourier transform (Middle), and the rate of  $\gamma$  and  $\beta$  events within a 500ms gaussian sliding window (Lower). B: Enlarged sections of the gray shaded epoch in panel A showing the LFP in all channels together with detected  $\gamma$  and  $\beta$  events. Event types coincide with distinct dynamics and rarely overlap. C: Histograms of the average distribution of the inter-event interval of  $\beta$  (left, blue) and  $\gamma$  (right, orange;  $n = 19$  mice) events. D: Fano factor of the inter-event interval distribution of  $\gamma$  and  $\beta$  events ( $n = 19$  mice).  $\gamma$  and  $\beta$  events in most mice have sub-poisson dynamics, indicating that they tend to occur at regularly spaced intervals. E: Percent overlap between  $\gamma$  and  $\beta$  events (Gray: mice, Purple: mean  $\pm$  s.d.,  $n = 201$  sessions in 19 mice).



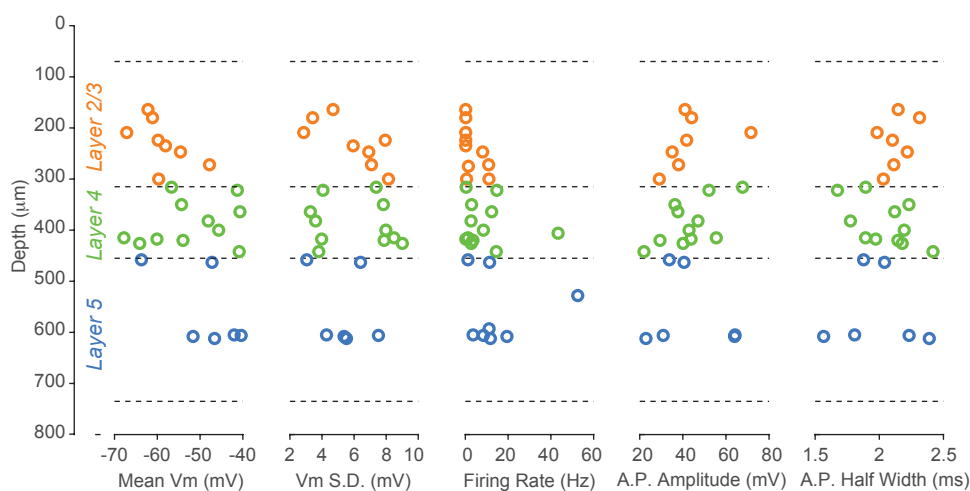

**Figure S6:** Intrinsic properties and laminar distribution of neurons recorded using in vivo whole-cell and cell-attached patch-clamp recordings. From left to right: mean membrane potential, standard deviation of the membrane potential, firing rate, action potential amplitude and, action potential half-width of neurons plotted against recording depth. Neurons between 70 and 315 μm were assigned to layers 2-3 (orange, 8 whole-cell, 2 cell-attached), those between 315 and 455 μm to layer 4 (green, 11 whole-cell, 1 cell-attached) and those between 455 and 735 μm to layer 5 (blue, 6 whole-cell, 2 cell-attached). Cell attached recordings were only used for firing rate. One cell in layer 2-3 did not fire any spontaneous action potentials and was only used for Vm activity.

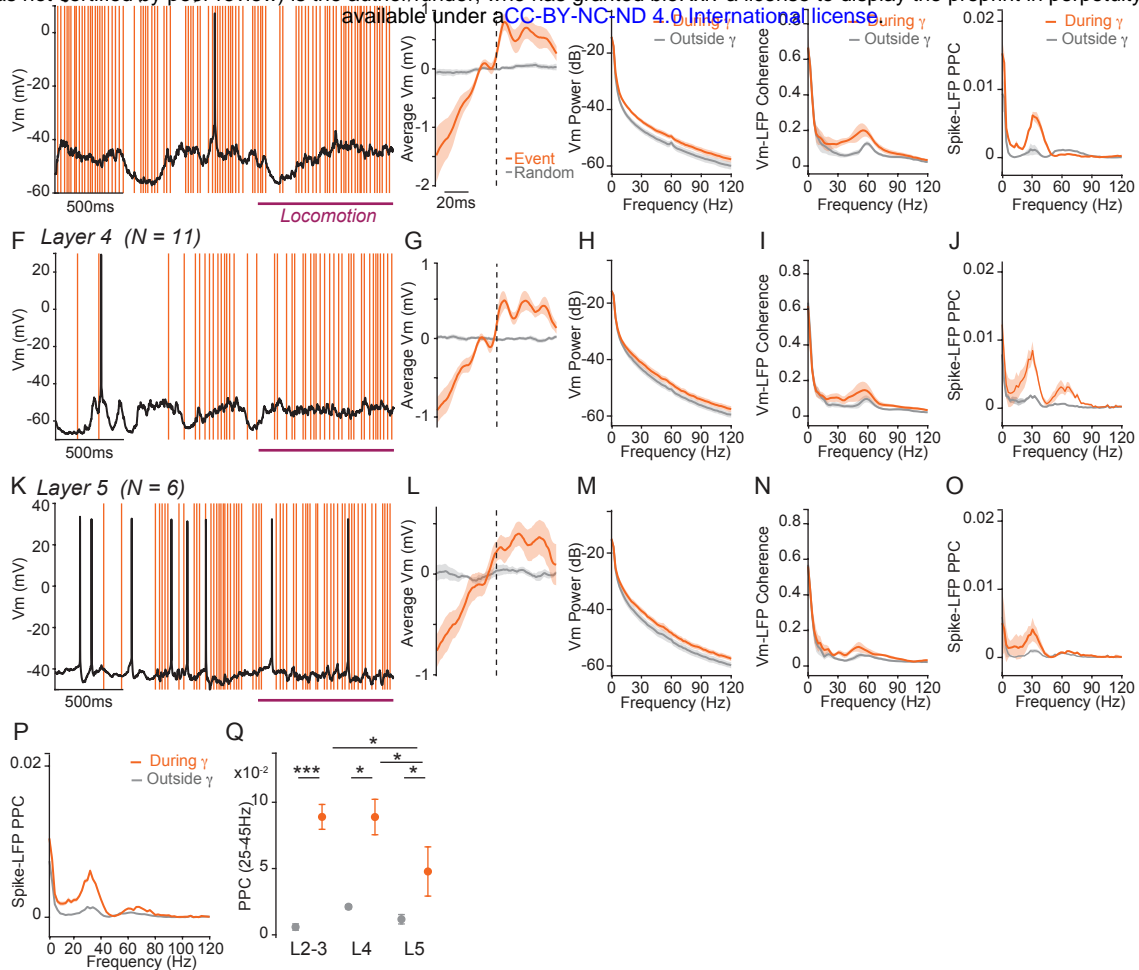

**Figure S7:**  $\gamma$  events synchronize the membrane potential and the firing of neurons in layers 2-3, 4 and 5. A: Example recording of a layer 2-3 neuron with  $\gamma$  events during transition from quiescence to locomotion (purple). B: Average membrane potential of layers 2-3 neurons around  $\gamma$  events (orange) and around randomly selected time points (gray) (Shaded area: mean  $\pm$  s.e.m., black bar: statistically significant difference; FDR corrected paired t-tests;  $q = 0.05$ ;  $n = 8$  whole-cell recordings). C: Power spectrum of the membrane potential of layers 2-3 neurons during (orange) or outside (gray) events. Gamma events coincide with an increase of the membrane potential power distributed across the frequency spectrum (Shaded area: mean  $\pm$  s.e.m., black bar: statistically significant difference; FDR corrected paired t-tests;  $q = 0.05$ ;  $n = 8$  whole-cell recordings). D: Vm-LFP coherence spectra for layers 2-3 neurons during (orange) and outside (gray)  $\gamma$  event cycles, showing selective enhancement of coherence in the  $\gamma$  range (Shaded area: mean  $\pm$  s.e.m., black bar: statistically significant difference; FDR corrected paired t-tests;  $q = 0.05$ ;  $n = 8$  whole-cell recordings). E: Spike-LFP synchrony spectra for layers 2-3 neurons during (orange) and outside (gray)  $\gamma$  event cycles. Spike-LFP synchrony is quantified with the Pairwise Phase Consistency (Method) and increases during  $\gamma$  event cycles (shade area: mean  $\pm$  s.e.m., black bar: statistically significant difference; FDR corrected Welch's t-tests;  $q = 0.05$ ;  $n = 11$  whole-cell/cell-attached recordings). F, G, H, and I: Same as A, B, C and D with an example layer 4 neuron ( $n = 11$  whole-cell recordings). J: Same as E for layer 4 neurons ( $n = 12$  whole-cell/cell-attached recordings). K, L, M, and N: Same as A, B, C and D with an example layer 5 neuron ( $n = 6$  whole-cell recordings). O: Same as E for layer 4 neurons ( $n = 8$  whole-cell/cell-attached recordings). P: Same as E for neurons pooled across layers 2-3, 4 and 5 ( $n = 30$  whole-cell/cell-attached recordings). Q: Overall spike-LFP gamma synchrony in the 20-45Hz range, during (orange) and outside (gray) event cycles for whole-cell and cell attached recordings in layers 2-3, 4 and 5. Synchrony is enhanced during gamma events and is strongest in Layer 2-3 and Layer 4 neurons (gray lines: neurons, error bars: mean  $\pm$  s.e.m., \*, \*\* and \*\*\* indicate significance with  $\alpha = 0.05, 0.01$  and  $0.001$  respectively; Welch t-test).

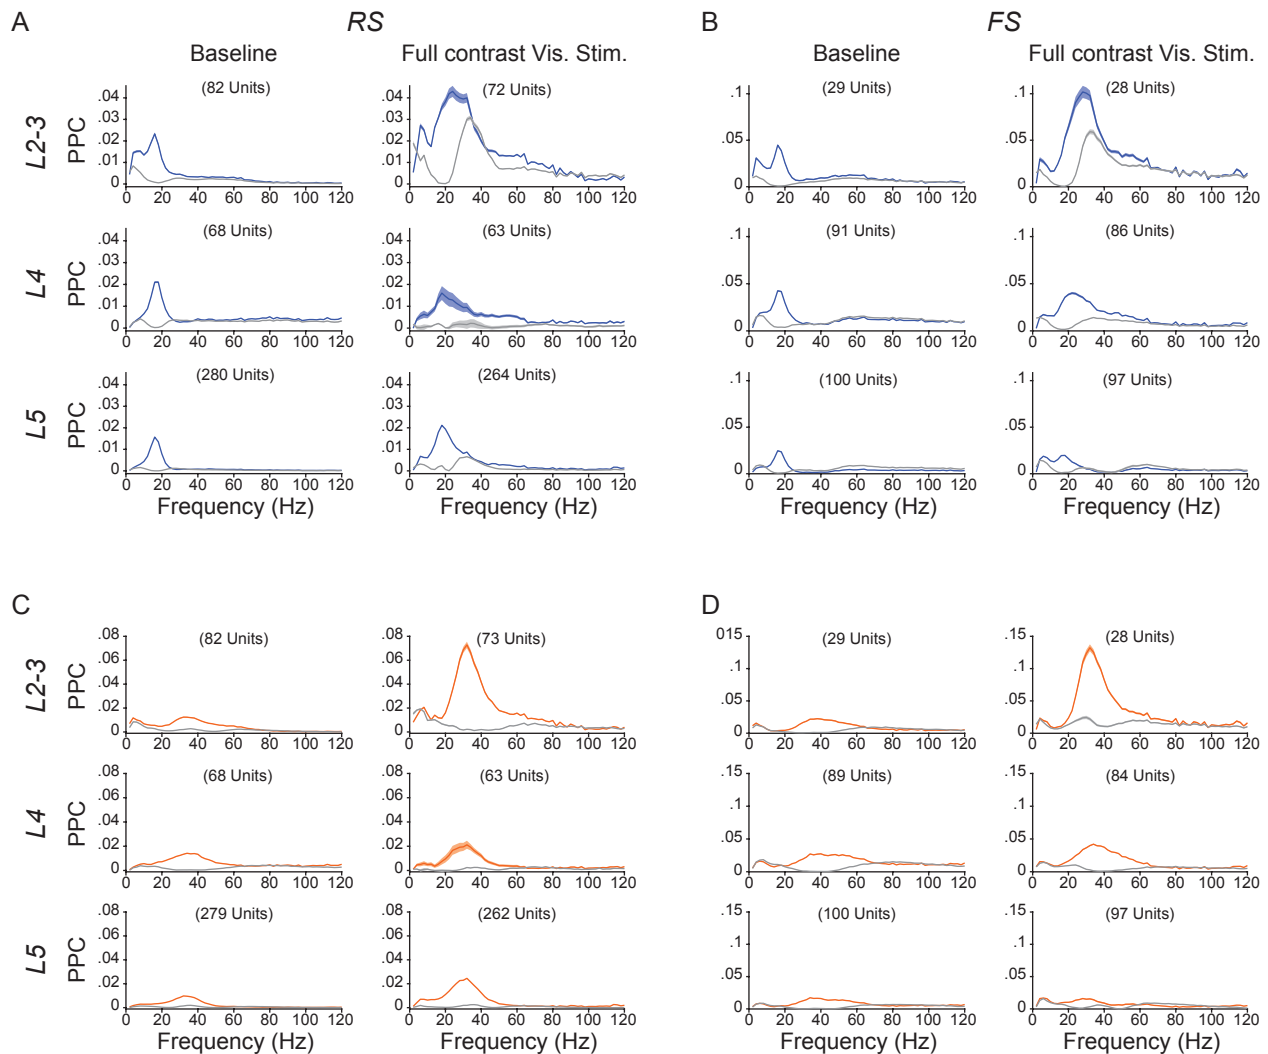

**Figure S8:** Spike-LFP PPC of RS and FS units. A: Spike-LFP synchrony spectra for RS units in layers 2-3 (Upper), 4 (Middle) and 5 (Lower) during (blue) and outside (gray)  $\beta$  event cycles, during baseline (left) and full contrast visual stimulation (right). Spike-LFP synchrony is quantified with the Pairwise Phase Consistency (Method) and increases during  $\beta$  event cycles (FDR corrected Welch's t-tests;  $q = 0.05$ ). B: Same as A for FS units. C and D: Same as A and B during (orange) and outside (gray)  $\gamma$  event cycles. Spike LFP synchrony of RS and FS units increases during  $\gamma$  events. Synchrony in  $\gamma$  events cycles is strongest during visual stimulation for layers 2-3 FS and RS units.

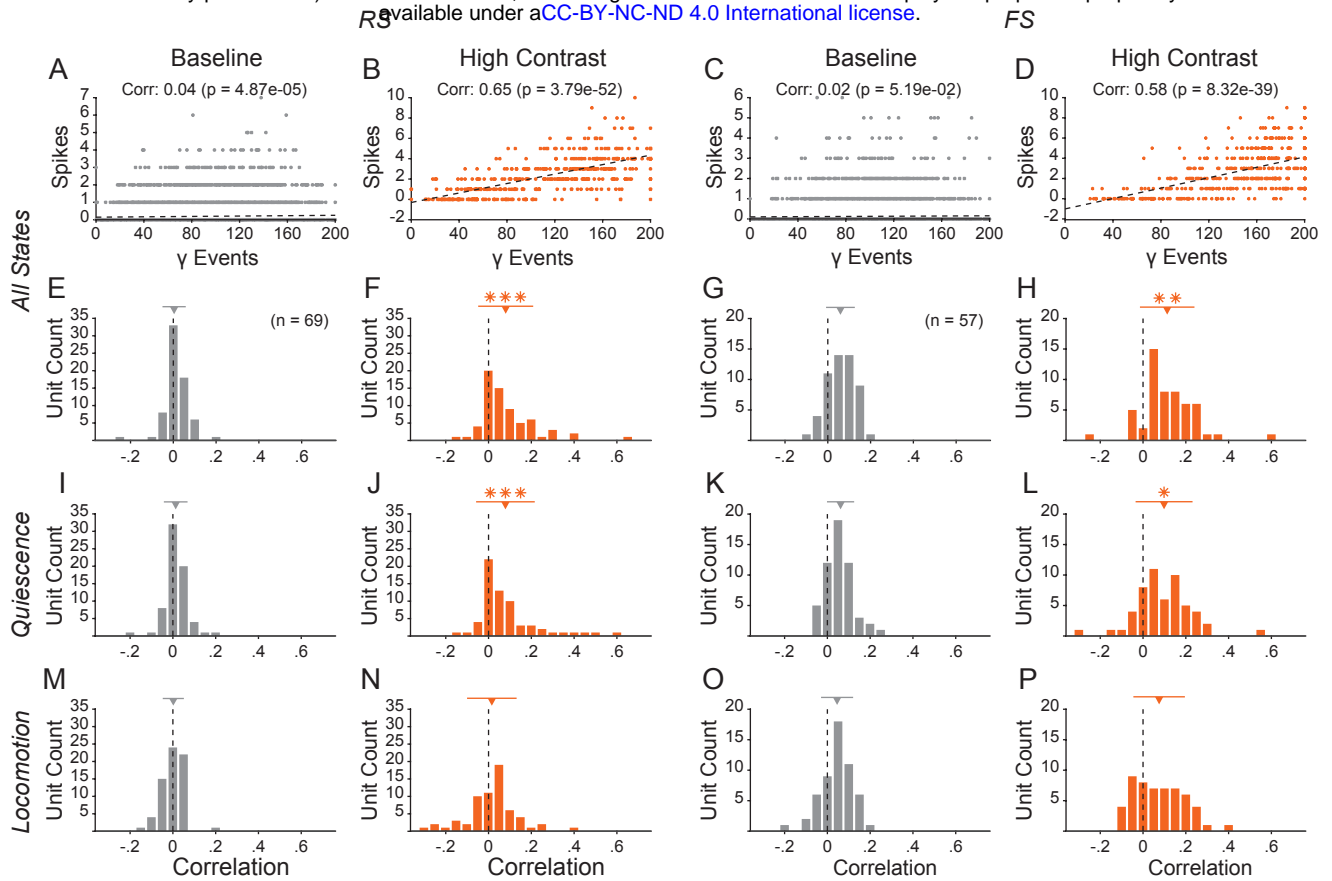

**Figure S9:** The firing of RS units correlates with  $\gamma$  event rates specifically during visual stimuli. A: Raster plot of the number of spikes generated by an example RS unit against the number of  $\gamma$  events within 8713 200ms LFP segments recorded during baseline. B: Raster plot of the number of spikes generated by the same example unit against the number of  $\gamma$  events occurring in each of the 425 LFP segments recorded during high contrast visual stimulation. The spike count is correlated with the number of  $\gamma$  events during visual stimulation but not during baseline activity. C: and D: Same as panels A and B for an example FS unit (Baseline: 9577 segments, Stimulation: 429 segments). E: Histogram of the correlation values between spike count and  $\gamma$  event number during baseline for 59 RS units (Downward triangle and bars at the top: mean  $\pm$  S.D.). F: Histogram of the correlation values between spike count and  $\gamma$  event number during high contrast visual stimulation for the same units as in panel E. The correlation of RS unit spike count and  $\gamma$  event count increases significantly during high contrast visual stimulation (Downward triangle and bars at the top: mean  $\pm$  S.D.; \*, \*\* and, \*\*\* indicate statistically significant deviation from the mean at baseline with  $p < 0.05$ ,  $p < 0.01$  and,  $p < 0.001$  respectively; paired t-test). G and H: Same as E and F for 57 FS unit. I, J, K, and L: same as E, F, G and H for LFP segments occurring specifically during quiescence. M, N, O, and P: same as E, F, G and H for LFP segments occurring specifically during locomotion.

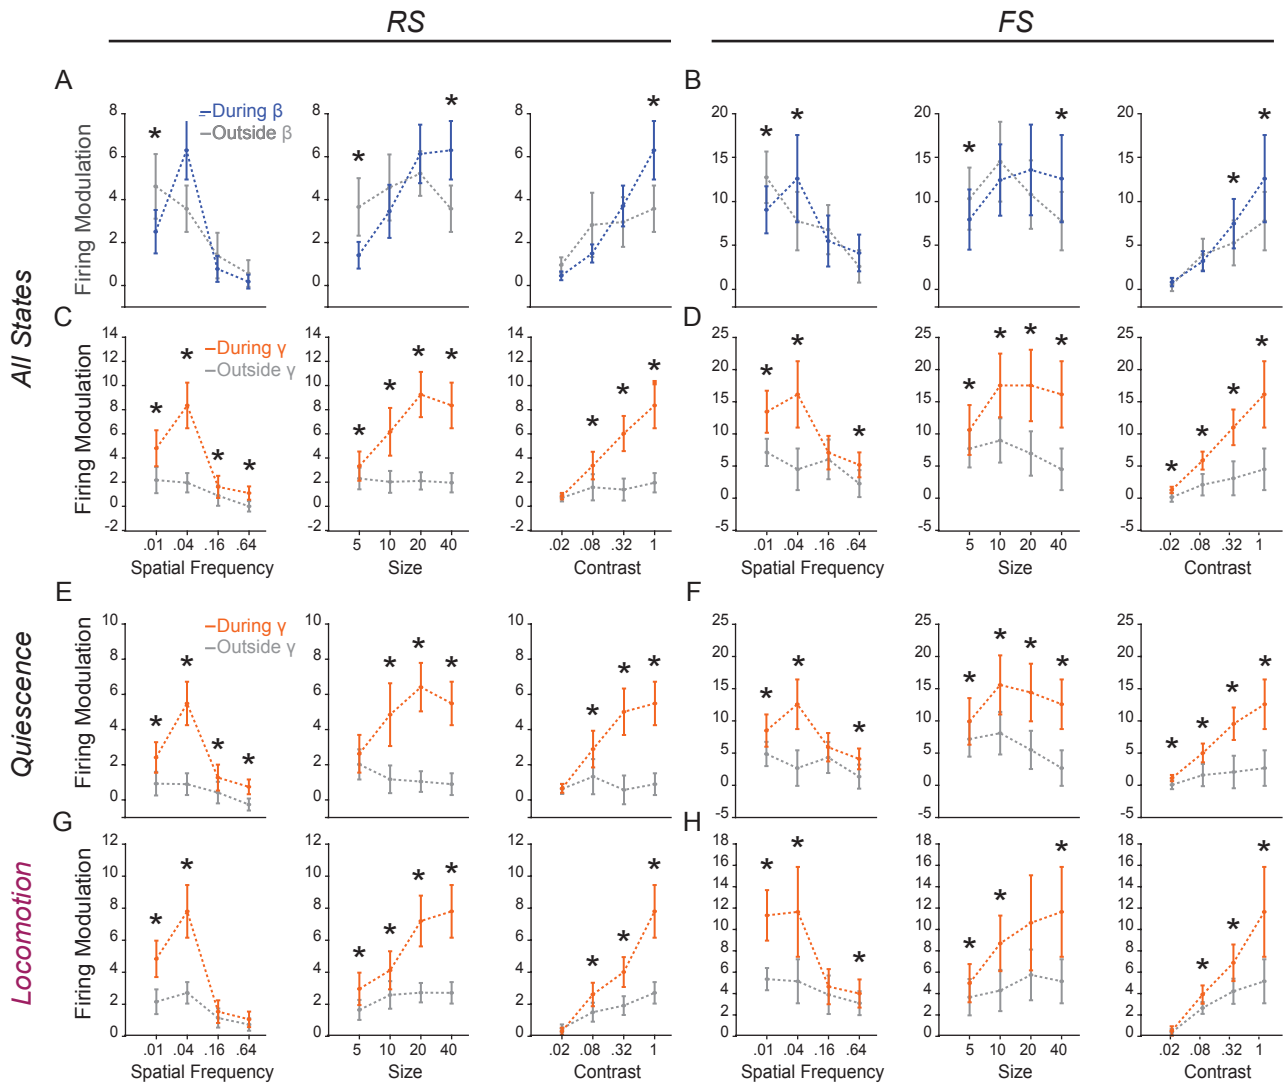

**Figure S10:** The spike response of RS and FS units to visual stimulation occurs preferentially during  $\gamma$  events. A: Modulation of the firing of RS units by gratings of varying spatial frequency (Left), size (Center) and contrast (Right) within (blue) and outside (gray)  $\beta$  event cycles ( $n = 47$  units). Unless otherwise noted, stimuli had a 0.04 cycle/degree spatial frequency, a 40-degree radius and were shown at 100% contrast (\*indicates statistically significant difference between modulation within and outside event cycles with  $p < 0.05$ ; paired t-test). B: Same as A for FS units ( $n = 31$  units). Visual feature selectivity was not strongly affected by  $\beta$  event. C and D: same as A and B for  $\gamma$  events. Firing modulation of RS and FS unit by visual stimuli was markedly stronger during  $\gamma$  events. E. and F. same as C and D exclusively during epochs of quiescence. E and F: same as C and D exclusively during epochs of locomotion. Firing modulation by visual stimulation was stronger within  $\gamma$  event cycles across both behavioral states.

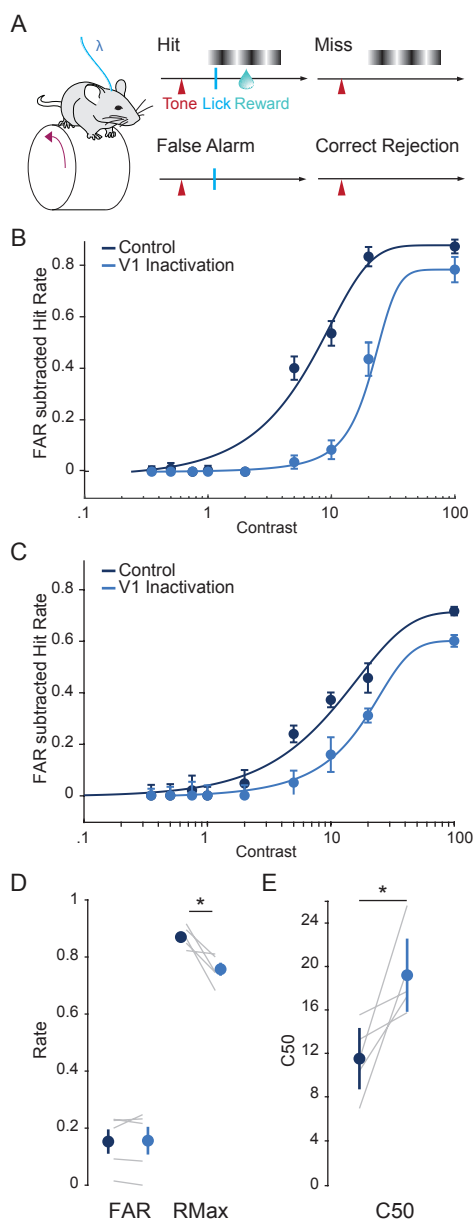

**Figure S11:** V1 inactivation reduces performance in a visual contrast detection task. **A:** Head-fixed PV-Cre mice injected with a AAV5-ef1a-DIO-ChR2-eYFP virus in V1 (see Supplementary Methods) performed a visual detection task. Trial onset was signaled by a tone. If a visual stimulus was displayed, mice could produce a lick response to obtain a water reward (Hit). Responses made while no stimulus was present on the screen led to a time out (False Alarm). Absence of a lick response upon stimulus presentation (Miss) or outside stimulus trials (Correct Rejection) produced no outcome. On a subset of trials, blue light was delivered with an optic fiber inactivating V1 through the activation of PV interneurons. **B:** False alarm subtracted hit rate (mean  $\pm$  s.e.m.) as a function of stimulus contrast during regular trials (dark blue) and during V1 inactivation (light blue) in an example mouse. A sigmoid function is fitted to the hit rate in each condition. **C:** Population average false alarm subtracted hit rate (mean  $\pm$  s.e.m.) as function of stimulus contrast ( $n = 5$  mice). V1 inactivation strongly reduced detection performance at low contrast. **D:** False alarm rate (FAR) and hit rate at maximum contrast (RMax) (dark blue) and during V1 inactivation (light blue). V1 inactivation does not affect the FAR but reduces RMax (gray lines: mice; error bars: mean  $\pm$  s.e.m., \*: significant with  $p < 0.05$ , paired t-test,  $n = 5$  mice). **E:** Contrast at which the hit rate is 50% (C50) on regular trials (dark blue) and during V1 inactivation (light blue). V1 inactivation increases the C50 (gray lines: mice, error bars: mean  $\pm$  s.e.m., \*: significant with  $p < 0.05$ , paired t-test,  $n = 5$  mice).



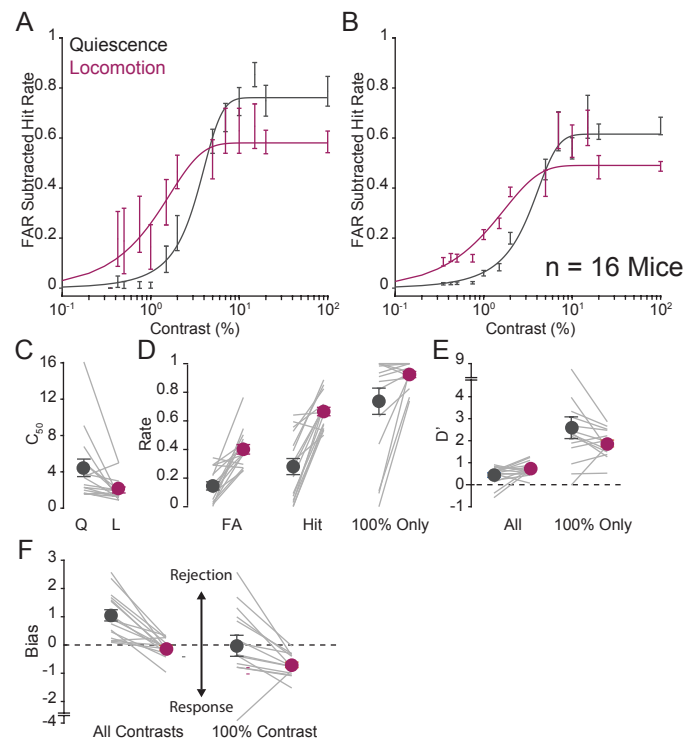

**Figure S12:** Locomotion enhances visual detection performance and increases bias towards response in a visual contrast detection task. A: False alarm subtracted hit rate (mean ± s.e.m.) as a function of stimulus contrast during quiescence (gray) and locomotion (purple) in an example mouse. The hit rate is fitted with a sigmoid curve. B: Population average false alarm subtracted hit rate (mean ± s.e.m.) as a function of stimulus contrast during quiescence (gray) and locomotion (purple) (n = 16 mice). C: Contrast yielding 50% chance of response (C<sub>50</sub>) during quiescence (gray) and locomotion (purple). Locomotion is accompanied with a decreased C<sub>50</sub> (gray lines: mice, error bars: mean ± s.e.m.). D: False alarm rate (FAR), hit rate across contrasts and hit rate at full contrast during quiescence (gray) and locomotion (purple). Locomotion is accompanied with increased hit and false alarm rates (gray lines: mice, error bars: mean ± s.e.m.). E: Sensitivity (d') of the response across contrast and at full contrast during quiescence (gray) and locomotion (purple). Locomotion has a small but significant effect on the sensitivity across contrast (gray lines: mice, error bars: mean ± s.e.m.). F: Bias of the response across all contrasts and at 100% contrast during quiescence (gray) and locomotion (purple). Locomotion significantly biases behavior towards responses (gray lines: mice, error bars: mean ± s.e.m., \*: significant with p < 0.05, paired t-test, n = 16 mice).

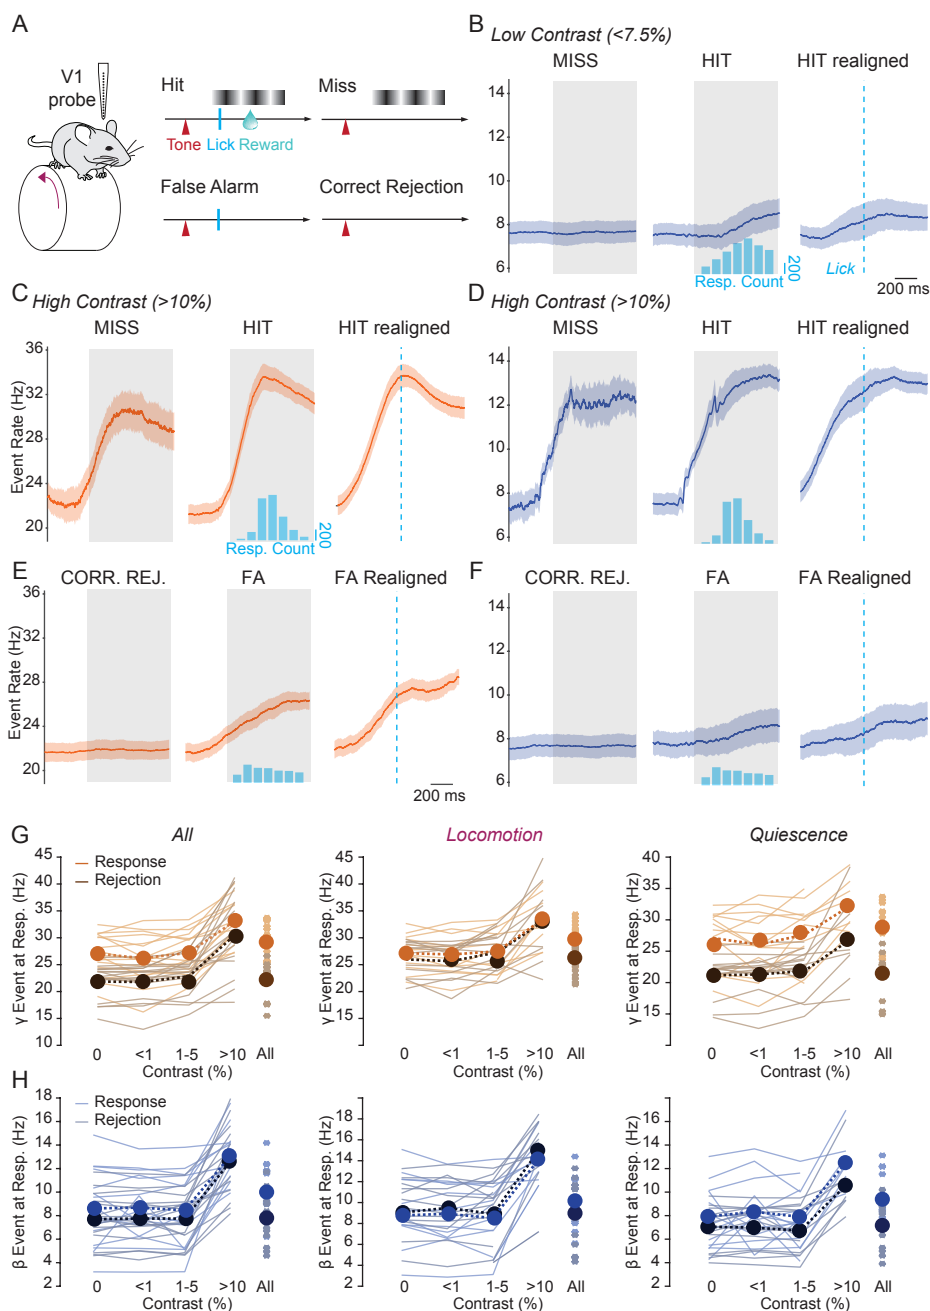

**Figure S13:** Selective increase in  $\gamma$ , but not  $\beta$ , events prior to behavioral response in a visual detection task. A: Head-fixed mice perform a visual contrast detection task while V1 activity is recorded with chronically implanted silicon probes (see Fig. 3). Trial onset is signaled by a tone. If a visual stimulus is displayed, mice can produce a lick response to obtain a water reward (Hit). Responses made while no stimulus is present on the screen lead to a time out (False Alarm, FA). Absence of a lick response on stimulus presentation (Miss) or outside stimulus presentation (Correct Rejection) produce no outcome. B: Average  $\beta$  event rate across 16 mice during low contrast trials ( $< 7.5\%$ ). Event rate is aligned to stimulus onset during miss (left) and hit trials (middle), and to response time on hit trial (complementary to Fig. 3D).  $\beta$  event occurrence is not significantly higher on hit trials (shaded area: mean  $\pm$  s.e.m., gray box: time of visual stimulus presentation; FDR corrected paired t-tests;  $q = 0.05$ ). C: Same as panel B for  $\gamma$  events during high contrast ( $> 10\%$ ) trials. D: Same as panel C for  $\beta$  events. E:  $\gamma$  event rates during 0% contrast (no go) trials.  $\gamma$  event occurrence is higher on FA trials than on correct rejections and aligns best to response onset (gray box: time when visual stimulus becomes possible; FDR corrected paired t-tests;  $q = 0.05$ ). F: Same as panel E for  $\beta$  events.  $\beta$  event occurrence is not significantly higher during FA trials. G. Rate of  $\gamma$  event at in the 300ms following response or average response time (rejections) for trials with stimuli of increasing contrasts, across all behavioral states (Left), during locomotion (Center) and during quiescence (Right). The rate of  $\gamma$  events is significantly higher at response than during rejection across contrasts, except during locomotion (thin lines: mice, error bars: mean  $\pm$  s.e.m., paired t-test,  $n = 16$  mice). H: Same as panel G for  $\beta$  events. There is no significant difference in  $\beta$  event rate between response and rejection trials.

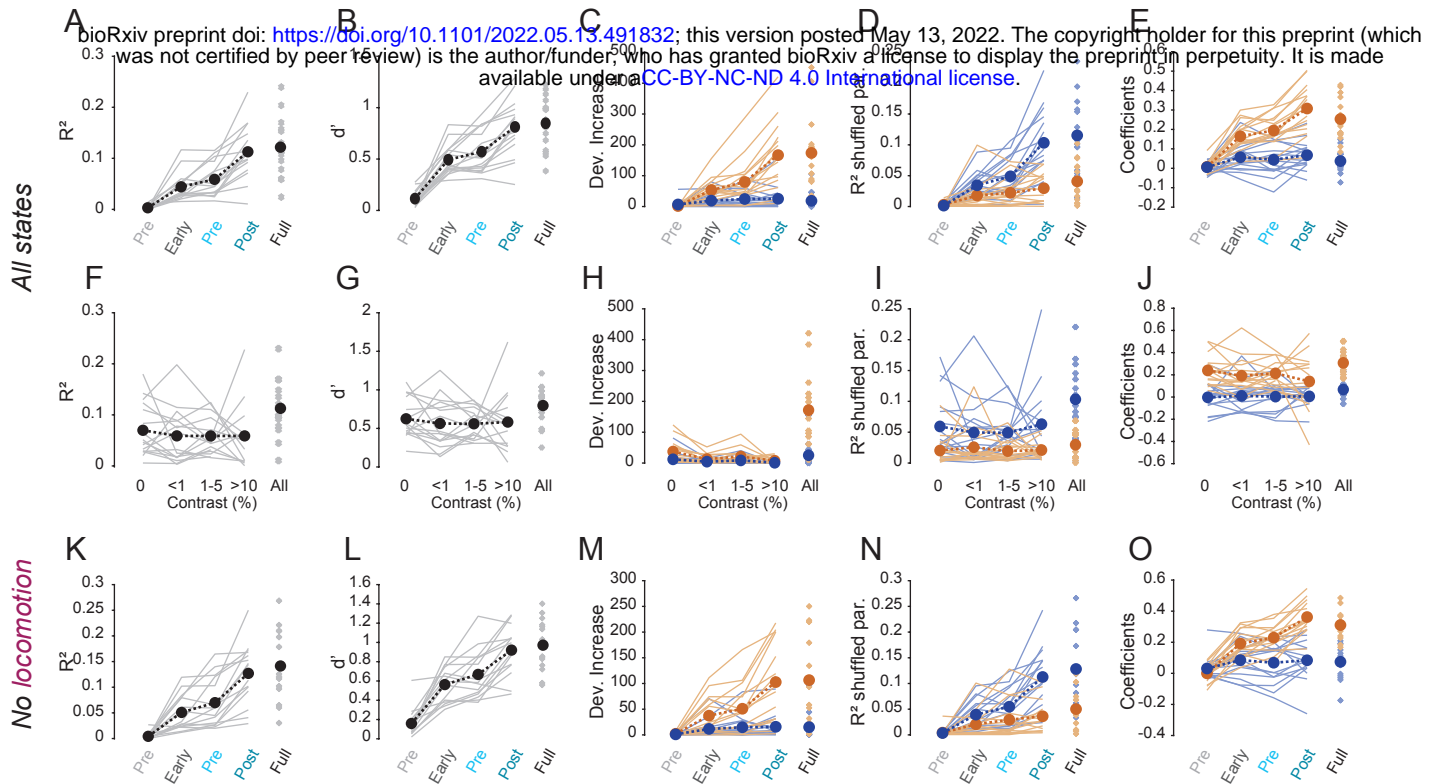

**Figure S14:**  $\gamma$  event occurrence predicts the trial-by-trial outcome of visual detection task performance across stimulus contrasts and behavioral states. A: McFadden's R-squared ( $R^2$ ) of a logistic regression of trial outcome based on  $\gamma$  and  $\beta$  event rate in different windows around stimulus onset, lick response or average response time (for rejection trials) (Pre-Stim: 300ms before stimulus onset, Early-Stim: 300ms after stimulus onset, Pre-Response: 300ms before response, Post-Response: 300ms after response, Full-Stim: Full visual stimulation, thin line: mice, thick dotted line: average across 16 mice). B: Same as panel A using the sensitivity ( $d'$ ) to measure regression performance. Prediction increases before response time and is highest right after the response. C: Deviance increase upon parameter removal. D:  $R^2$  after parameter shuffling. E: Regression coefficients show that  $\gamma$  event occurrence has the strongest influence on model prediction (thin line: mice, thick dotted line: average across 16 mice). F, G, H, I and J: same as A, B, C, D and E for visual stimulation with increasing contrasts in the Post-Stimulus window. Model performance is stable across contrasts, suggesting that the predictions do not arise simply from contrast-dependent responses in  $\gamma$  or  $\beta$ . K, L, M, N and O: same as panels A, B, C, D and E, excluding trials where locomotion occurred at any point within 2s of trial onset. Locomotion-related increases in  $\gamma$  event occurrence thus do not account for model performance.

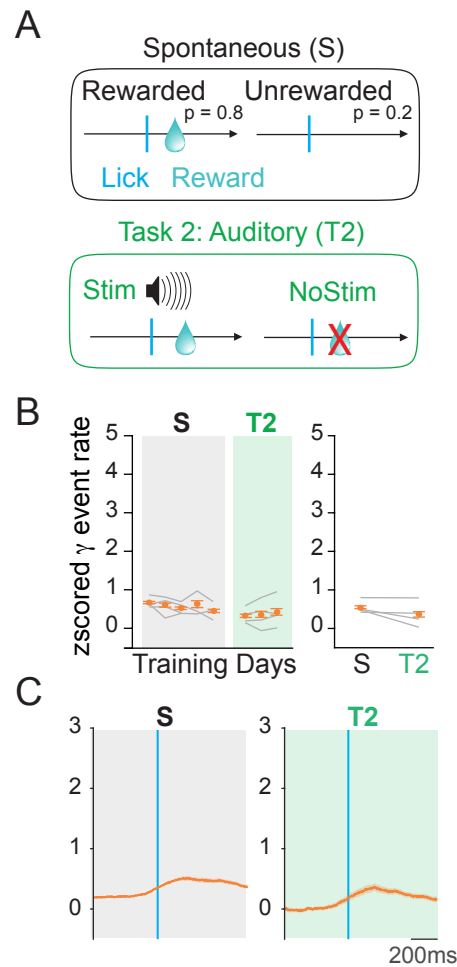

**Figure S15:** Rate of  $\gamma$  event occurrence around response across behavioral paradigms. A: Mice were trained on the spontaneous reward (S) task for 5 days and then switched to a task where reward can only be obtained during auditory stimuli (Task 2) for 3 days. B: Left: Normalized  $\gamma$  event rate around rewarded responses across training days in S and T2.  $\gamma$  event rate does not increase during auditory guided responses. Right: Overall  $\gamma$  event rate at rewarded responses over each task block ( $n = 4$  mice). C: Average  $\gamma$  event rate (during trials with rewarded lick responses during S and T2 paradigms).  $\gamma$  event rate in V1 did not increase on correct auditory detection trials.

**Supplemental Table 1. Summary of all statistical analyses.**

| Figure  | Comparison                                                                              | N                                                     | Test                                                                                                         | Statistics and p-value                                                                                       |
|---------|-----------------------------------------------------------------------------------------|-------------------------------------------------------|--------------------------------------------------------------------------------------------------------------|--------------------------------------------------------------------------------------------------------------|
| Fig. 1C | Fourier spectrum quiet vs running                                                       | 19 mice                                               | FDR corrected paired t-test                                                                                  | q = 0.05<br>Significant: 0-22, 26-120Hz                                                                      |
| Fig. 1G | Multi-taper Fourier spectrum $\gamma$ event vs random                                   | 19 mice                                               | FDR corrected paired t-test                                                                                  | q = 0.05<br>Significant: 0-120Hz                                                                             |
| Fig. 1H | Fourier spectrum high vs low $\gamma$ event rate                                        | 19 mice                                               | FDR corrected paired t-test                                                                                  | q = 0.05<br>Significant: 0-20, 26-120Hz                                                                      |
| Fig. 1J | $\gamma$ event rate quiet vs running                                                    | 17 mice                                               | Paired t-test                                                                                                | $p < 0.0001$ ( $8.26 \times 10^{-11}$ )                                                                      |
| Fig. 2C | Vm triggered average - $\gamma$ event vs random                                         | 25 neurons                                            | FDR corrected paired t-test                                                                                  | q = 0.05<br>(-50.0)-(-16.5), (-1.0)-50.0ms                                                                   |
| Fig. 2D | Vm-LFP Coherence spectrum - during vs outside $\gamma$ event cycles                     | 25 neurons                                            | FDR corrected paired t-test                                                                                  | q = 0.05<br>Significant: 2-4, 14-120Hz                                                                       |
| Fig. 2E | Vm-LFP Coherence between 30-80Hz - during vs outside $\gamma$ event cycles              | L2-3: 8 neurons<br>L4: 11 neurons<br>L5: 6 neurons    | paired t-test                                                                                                | L2-3: $9.06 \times 10^{-64}$<br>L4: 0.037<br>L5: 0.033                                                       |
| Fig. 2E | Vm-LFP Coherence between 30-80Hz during event cycles- L2-3 vs L4 vs L5                  | L2-3: 8 neurons<br>L4: 11 neurons<br>L5: 6 neurons    | t-test                                                                                                       | L2-3 vs L4: 0.278 (N.S)<br>L2-3 vs L5: 0.017<br>L4 vs L5: 0.482 (N.S)                                        |
| Fig. 2G | Single Units PPC between 30-80Hz - during vs outside $\gamma$ event cycles              | L2-3: 82 neurons<br>L4: 68 neurons<br>L5: 279 neurons | Welch's t-test                                                                                               | L2-3: $3.78 \times 10^{-42}$<br>L4: $5.77 \times 10^{-31}$<br>L5: $2.09 \times 10^{-221}$                    |
| Fig. 2G | Single Units PPC between 30-80Hz during event cycles- L2-3 vs L4 vs L5                  | L2-3: 82 neurons<br>L4: 68 neurons<br>L5: 279 neurons | Welch's t-test                                                                                               | L2-3 vs L4: $4.43 \times 10^{-39}$<br>L2-3 vs L5: $9.03 \times 10^{-48}$<br>L4 vs L5: $2.71 \times 10^{-29}$ |
| Fig. 2J | RS unit firing modulation [2, 8, 32, 100] % contrast- during vs outside $\gamma$ events | 47 units                                              | paired t-test                                                                                                | $p = [0.598$ (N.S.), $8.16 \times 10^{-5}$ , $1.68 \times 10^{-6}$ , $1.13 \times 10^{-5}]$                  |
| Fig. 3D | $\gamma$ event rate on low contrast trials- response vs rejection trials                | 16 mice                                               | FDR corrected paired t-test                                                                                  | q = 0.05<br>Significant: -399, -397(-396), -394(-389), -385, -376(-365), -362, 89, 95-799ms                  |
| Fig. 3F | D' Logistic regression                                                                  | 16 mice                                               | Fisher's method (over mice) - Likelihood Ratio Tests against null model (each mouse)                         | PresStim: $2.44 \times 10^{-15}$ ; Init:0; PreLick:0; PostLick:0; FullStim:0                                 |
| Fig. 3G | $\beta$ event contribution                                                              | 16 mice                                               | Fisher's method (over mice) - Likelihood Ratio Tests against full model after parameter removal (each mouse) | PresStim: $1.75 \times 10^{-14}$ ; Init:0; PreLick:0; PostLick:0; FullStim:0                                 |
| Fig. 3G | $\gamma$ event contribution                                                             | 16 mice                                               | Fisher's method (over mice) - Likelihood Ratio Tests against full model after parameter removal (each mouse) | PresStim:0.048; Init:0; PreLick:0; PostLick:0; FullStim:0                                                    |
| Fig. 4B | $\gamma$ event rate - unrewarded response vs baseline - free reward 1                   | 7 mice                                                | FDR corrected Fisher's method on t-test                                                                      | q = 0.05<br>Significant: none                                                                                |
| Fig. 4B | $\gamma$ event rate - unrewarded response vs baseline - visual task                     | 7 mice                                                | FDR corrected Fisher's method on t-test                                                                      | q = 0.05<br>Significant: none                                                                                |
| Fig. 4B | $\gamma$ event rate - unrewarded response vs baseline - free reward 2                   | 7 mice                                                | FDR corrected Fisher's method on t-test                                                                      | q = 0.05<br>Significant: none                                                                                |

|          |                                                                                               |            |                                         |                                                                                                                    |
|----------|-----------------------------------------------------------------------------------------------|------------|-----------------------------------------|--------------------------------------------------------------------------------------------------------------------|
| Fig. 4B  | $\gamma$ event rate on unrewarded response – free reward 1 vs visual vs free reward 2         | 5 mice     | paired t-test                           | Free1 vs Visual: $p = 0.0881$ (N.S.)<br>Free1 vs Free2: $p = 0.763$ (N.S.)<br>Visual vs Free2: $p = 0.0622$ (N.S.) |
| Fig. 4B  | $\gamma$ event rate - rewarded response vs baseline – free reward 1                           | 7 mice     | FDR corrected Fisher's method on t-test | $q = 0.05$<br>Significant: none                                                                                    |
| Fig. 4B  | $\gamma$ event rate - rewarded response vs baseline – visual task                             | 7 mice     | FDR corrected Fisher's method on t-test | $q = 0.05$<br>Significant: d1-d10                                                                                  |
| Fig. 4B  | $\gamma$ event rate - rewarded response vs baseline – free reward 2                           | 7 mice     | FDR corrected Fisher's method on t-test | $q = 0.05$<br>Significant: none                                                                                    |
| Fig. 4B  | $\gamma$ event rate on rewarded response – free reward 1 visual vs free reward 2              | 5 mice     | paired t-test                           | Free1 vs Visual: $p = 6.13 \times 10^{-4}$<br>Free1 vs Free2: $p = 0.799$ (N.S.)<br>Visual vs Free2: $p = 0.0014$  |
| Fig. 4C  | $\gamma$ event rate - rewarded response vs baseline – free reward                             | 7 mice     | FDR corrected Fisher's method on t-test | $q = 0.05$<br>Significant: none                                                                                    |
| Fig. 4C  | $\gamma$ event rate - rewarded response vs baseline – forced visual task                      | 7 mice     | FDR corrected Fisher's method on t-test | $q = 0.05$<br>Significant: d1-d2                                                                                   |
| Fig. 4C  | $\gamma$ event rate - rewarded response vs baseline – visual task                             | 7 mice     | FDR corrected Fisher's method on t-test | $q = 0.05$<br>Significant: d1-d3                                                                                   |
| Fig. 4C  | $\gamma$ event rate on unrewarded response – free reward vs forced visual vs visual           | 7 mice     | paired t-test                           | Free1 vs Forced: $p = 0.0304$<br>Free1 vs Visual: $p = 9.24 \times 10^{-4}$<br>Forced vs Visual: $p = 0.00154$     |
| Fig. 4D  | $\gamma$ event rate - rewarded response vs baseline – free reward                             | 4 mice     | FDR corrected Fisher's method on t-test | $q = 0.05$<br>Significant: none                                                                                    |
| Fig. 4D  | $\gamma$ event rate - rewarded response vs baseline – audio task                              | 4 mice     | FDR corrected Fisher's method on t-test | $q = 0.05$<br>Significant: none                                                                                    |
| Fig. 4D  | $\gamma$ event rate on unrewarded response – free reward vs audio                             | 4 mice     | paired t-test                           | $p = 0.175$ (N.S.)                                                                                                 |
| Fig. S4C | Fourier Spectrum quiet vs visual presentation                                                 | 19 mice    | FDR corrected paired t-test             | $q = 0.05$<br>Significant: 0-50, 58-120Hz                                                                          |
| Fig. S4E | Multi-taper Fourier spectrum $\beta$ event vs random                                          | 19 mice    | FDR corrected paired t-test             | $q = 0.05$<br>Significant: 0-95Hz                                                                                  |
| Fig. S4F | Fourier spectrum high vs low $\beta$ event rate                                               | 19 mice    | FDR corrected paired t-test             | $q = 0.05$<br>Significant: 0-48, 54-60, 74-120Hz                                                                   |
| Fig. S4H | $\beta$ event rate quiet vs visual stimulation                                                | 17 mice    | Paired t-test                           | $p < 0.0001$ ( $4.19 \times 10^{-7}$ )                                                                             |
| Fig. S7B | Vm triggered average - $\gamma$ event vs random – L2-3                                        | 8 neurons  | FDR corrected paired t-test             | $q = 0.05$<br>Significant: (-50.0)-(-17.0), 0.5-16.5, 18.0-48.5ms                                                  |
| Fig. S7C | Vm Fourier spectrum – aligned to $\gamma$ event cycles vs aligned to non-event troughs – L2-3 | 8 neurons  | FDR corrected paired t-test             | $q = 0.05$<br>Significant: 6-120Hz                                                                                 |
| Fig. S7D | Coherence spectrum - during vs outside $\gamma$ event cycles – L2-3                           | 8 neurons  | FDR corrected paired t-test             | $q = 0.05$<br>Significant: 16, 24-54, 66-88, 114-120Hz                                                             |
| Fig. S7E | PPC spectrum - during vs outside $\gamma$ event cycles – L2-3                                 | 8 neurons  | FDR corrected Welch's t-test            | $q = 0.05$<br>Significant: 2-88, 92-98, 102-120Hz                                                                  |
| Fig. S7G | Vm triggered average - $\gamma$ event vs random – L4                                          | 11 neurons | FDR corrected paired t-test             | $q = 0.05$<br>Significant: (-50.0)-(-17.5), 0.5-45.0ms                                                             |



|          |                                                                                             |                                                    |                              |                                                                                 |
|----------|---------------------------------------------------------------------------------------------|----------------------------------------------------|------------------------------|---------------------------------------------------------------------------------|
| Fig. S7H | Vm Fourier spectrum – aligned to $\gamma$ event cycles vs aligned to non-event troughs – L4 | 11 neurons                                         | FDR corrected paired t-test  | q = 0.05<br>Significant: 8-120Hz                                                |
| Fig. S7I | Coherence spectrum - during vs outside $\gamma$ event cycles – L4                           | 11 neurons                                         | FDR corrected paired t-test  | q = 0.05<br>Significant: 2, 22-32, 78-86Hz                                      |
| Fig. S7J | PPC spectrum - during vs outside $\gamma$ event cycles – L4                                 | 12 neurons                                         | FDR corrected Welch's t-test | q = 0.05<br>Significant: 2-6, 14-94, 98-102, 108, 112-114Hz                     |
| Fig. S7L | Vm triggered average - $\gamma$ event vs random – L5                                        | 6 neurons                                          | FDR corrected paired t-test  | q = 0.05<br>N.S.                                                                |
| Fig. S7M | Vm Fourier spectrum – aligned to $\gamma$ event cycles vs aligned to non-event troughs – L5 | 6 neurons                                          | FDR corrected paired t-test  | q = 0.05<br>Significant: 10-120Hz                                               |
| Fig. S7N | Coherence spectrum - during vs outside $\gamma$ event cycles – L5                           | 6 neurons                                          | FDR corrected paired t-test  | q = 0.05<br>Significant: 14, 22 22, 32, 48, 76-78Hz                             |
| Fig. S7O | PPC spectrum - during vs outside $\gamma$ event cycles – L5                                 | 8 neurons                                          | FDR corrected Welch's t-test | q = 0.05<br>Significant: 10-14, 24-46, 50-54, 58-60, 66-96Hz                    |
| Fig. S7P | PPC spectrum - during vs outside $\gamma$ event cycles – All Layers                         | 28 neurons                                         | FDR corrected Welch's t-test | q = 0.05<br>Significant: 2-50, 54-94, 98-102, 106-120Hz                         |
| Fig S7Q  | PPC between 25-45Hz - during vs outside $\gamma$ event cycles                               | L2-3: 8 neurons<br>L4: 12 neurons<br>L5: 8 neurons | Welch's t-test               | L2-3: $1.97 \times 10^{-4}$<br>L4: $3.5 \times 10^{-4}$<br>L5: 0.0955 (N.S.)    |
| Fig S7Q  | PPC between 25-45Hz during event cycles- L2-3 vs L4 vs L5                                   | L2-3: 8 neurons<br>L4: 12 neurons<br>L5: 8 neurons | Welch's t-test               | L2-3 vs L4: 0.771 (N.S.)<br>L2-3 vs L5: 0.119 (N.S.)<br>L4 vs L5: 0.0945 (N.S.) |
| Fig. S8A | L2-3 RS unit PPC spectrum – baseline - around vs outside $\beta$ event cycles               | 82 unit                                            | FDR corrected paired t-test  | q = 0.05<br>Significant: 2-120Hz                                                |
| Fig. S8A | L2-3 RS unit PPC spectrum – full contrast stim. - around vs outside $\beta$ event cycles    | 72 unit                                            | FDR corrected paired t-test  | q = 0.05<br>Significant: 2, 6-32, 40, 46-86, 94, 98-112, 118Hz                  |
| Fig. S8A | L4 RS unit PPC spectrum - baseline - around vs outside $\beta$ event cycles                 | 68 unit                                            | FDR corrected paired t-test  | q = 0.05<br>Significant: 2-24, 28-36, 40, 46-48, 52-120Hz                       |
| Fig. S8A | L4 RS unit PPC spectrum – full contrast stim. - around vs outside $\beta$ event cycles      | 63 unit                                            | FDR corrected paired t-test  | q = 0.05<br>Significant: 2-34, 38-64, 78-120Hz                                  |
| Fig. S8A | L5 RS unit PPC spectrum – baseline - around vs outside $\beta$ event cycles                 | 280 unit                                           | FDR corrected paired t-test  | q = 0.05<br>Significant: 2, 6-120Hz                                             |
| Fig. S8A | L5 RS unit PPC spectrum – full contrast stim. - around vs outside $\beta$ event cycles      | 264 unit                                           | FDR corrected paired t-test  | q = 0.05<br>Significant: 2-120Hz                                                |
| Fig. S8B | L2-3 FS unit PPC spectrum – baseline - around vs outside $\beta$ event cycles               | 29 unit                                            | FDR corrected paired t-test  | q = 0.05<br>Significant: 2-80, 84, 96, 106, 112-116, 120Hz                      |
| Fig. S8B | L2-3 FS unit PPC spectrum – full contrast stim. - around vs outside $\beta$ event cycles    | 28 unit                                            | FDR corrected paired t-test  | q = 0.05<br>Significant: 2-40, 44-64,, 114-116Hz                                |
| Fig. S8B | L4 FS unit PPC spectrum - baseline - around vs outside $\beta$ event cycles                 | 91 unit                                            | FDR corrected paired t-test  | q = 0.05<br>Significant: 1-6, 10-42, 48, 54-106Hz                               |
| Fig. S8B | L4 FS unit PPC spectrum – full contrast stim. - around vs outside $\beta$ event cycles      | 86 unit                                            | FDR corrected paired t-test  | q = 0.05<br>Significant: 2, 6-80, 84-96, 100-120Hz                              |
| Fig. S8B | L5 FS unit PPC spectrum – baseline - around vs outside $\beta$ event cycles                 | 100 unit                                           | FDR corrected paired t-test  | q = 0.05<br>Significant: 2-120Hz                                                |

|            |                                                                                                       |                   |                             |                                                                            |
|------------|-------------------------------------------------------------------------------------------------------|-------------------|-----------------------------|----------------------------------------------------------------------------|
| Fig. S8B   | L5 FS unit PPC spectrum – full contrast stim. - around vs outside $\beta$ event cycles                | 97 unit           | FDR corrected paired t-test | q = 0.05<br>Significant: 2, 6-26, 56-88, 92-94, 98-110, 114-118Hz          |
| Fig. S8C   | L2-3 RS unit PPC spectrum – baseline - around vs outside $\gamma$ event cycles                        | 82 unit           | FDR corrected paired t-test | q = 0.05<br>Significant: 2-74, 78-90, 94-100, 108-120Hz                    |
| Fig. S8C   | L2-3 RS unit PPC spectrum – full contrast stim. - around vs outside $\gamma$ event cycles             | 73 unit           | FDR corrected paired t-test | q = 0.05<br>Significant: 2-4, 8-10, 14-86, 90, 98, 104-106Hz               |
| Fig. S8C   | L4 RS unit PPC spectrum - baseline - around vs outside $\gamma$ event cycles                          | 68 unit           | FDR corrected paired t-test | q = 0.05<br>Significant: 2-64, 70-72, 76, 80-84, 90-92, 96, 100-120Hz      |
| Fig. S8C   | L4 RS unit PPC spectrum – full contrast stim. - around vs outside $\gamma$ event cycles               | 63 unit           | FDR corrected paired t-test | q = 0.05<br>Significant: 4-54, 72, 76, 84, 90-96, 100, 108, 112-116, 120Hz |
| Fig. S8C   | L5 RS unit PPC spectrum – baseline - around vs outside $\gamma$ event cycles                          | 279 unit          | FDR corrected paired t-test | q = 0.05<br>Significant: 2-120Hz                                           |
| Fig. S8C   | L5 RS unit PPC spectrum – full contrast stim. - around vs outside $\gamma$ event cycles               | 262 unit          | FDR corrected paired t-test | q = 0.05<br>Significant: 2-66, 74-120Hz                                    |
| Fig. S8D   | L2-3 FS unit PPC spectrum – baseline - around vs outside $\gamma$ event cycles                        | 29 unit           | FDR corrected paired t-test | q = 0.05<br>Significant: 2-4, 18-60, 70-78, 82, 86-88, 98, 116, 120Hz      |
| Fig. S8D   | L2-3 FS unit PPC spectrum – full contrast stim. - around vs outside $\gamma$ event cycles             | 28 unit           | FDR corrected paired t-test | q = 0.05<br>Significant: 2, 8-10, 14-80, 84, 90, 96, 108-120Hz             |
| Fig. S8D   | L4 FS unit PPC spectrum - baseline - around vs outside $\gamma$ event cycles                          | 89 unit           | FDR corrected paired t-test | q = 0.05<br>Significant: 2-16, 20-68, 72-106, 112-120Hz                    |
| Fig. S8D   | L4 FS unit PPC spectrum – full contrast stim. - around vs outside $\gamma$ event cycles               | 84 unit           | FDR corrected paired t-test | q = 0.05<br>Significant: 4, 10-68, 74-78, 82-88, 94-102, 108-120Hz         |
| Fig. S8D   | L5 FS unit PPC spectrum – baseline - around vs outside $\gamma$ event cycles                          | 100 unit          | FDR corrected paired t-test | q = 0.05<br>Significant: 2, 8-68, 72-102, 108-120Hz                        |
| Fig. S8D   | L5 FS unit PPC spectrum – full contrast stim. - around vs outside $\gamma$ event cycles               | 97 unit           | FDR corrected paired t-test | q = 0.05<br>Significant: 2-4, 8-10, 14-56, 62-94, 98, 104-120Hz            |
| Fig. S9A   | Example RS unit – correlation between $\gamma$ event number and firing – baseline                     | 9577 200ms chunks | t-test                      | p = $4.87 \times 10^{-5}$                                                  |
| Fig. S9B   | Example RS unit – correlation between $\gamma$ event number and firing – full contrast                | 429 200ms chunks  | t-test                      | p = $3.79 \times 10^{-52}$                                                 |
| Fig. S9C   | Example FS unit – correlation between $\gamma$ event number and firing - baseline                     | 8713 200ms chunks | t-test                      | p = 0.519 (N.S.)                                                           |
| Fig. S9D   | Example FS unit – correlation between $\gamma$ event number and firing – full contrast                | 425 200ms chunks  | t-test                      | p = $8.32 \times 10^{-39}$                                                 |
| Fig. S9E-F | Correlation between $\gamma$ event number and firing – Baseline vs Full Contrast – RS units           | 69 units          | paired t-test               | p = $3.34 \times 10^{-6}$                                                  |
| Fig. S9G-H | Correlation between $\gamma$ event number and firing – Baseline vs Full Contrast – FS units           | 57 units          | paired t-test               | p = $8.63 \times 10^{-3}$                                                  |
| Fig. S9I-J | Correlation between $\gamma$ event number and firing – Baseline vs Full Contrast – RS units - sitting | 69 units          | paired t-test               | p = $4.59 \times 10^{-5}$                                                  |
| Fig. S9K-L | Correlation between $\gamma$ event number and firing – Baseline vs Full Contrast – FS units - sitting | 57 units          | paired t-test               | p = 0.0431                                                                 |

|            |                                                                                                                                     |                        |               |                                                                                       |
|------------|-------------------------------------------------------------------------------------------------------------------------------------|------------------------|---------------|---------------------------------------------------------------------------------------|
| Fig. S9O-P | Correlation between $\gamma$ event number and firing – Baseline vs Full Contrast – FS units - running                               | 57 units               | paired t-test | $p = 0.12$ (N.S)                                                                      |
| Fig. S9M-N | Correlation between $\gamma$ event number and firing – Baseline vs Full Contrast – RS units - running                               | 69 units               | paired t-test | $p = 0.252$ (N.S)                                                                     |
| Fig. S10A  | RS unit firing modulation [0.01, 0.04, 0.16, 0.64] cycle per degree spatial frequency – during vs outside $\beta$ events            | 47 units               | paired t-test | $p = [0.001, 2.9 \times 10^{-5}, 0.438$ (N.S.), 0.495 (N.S.)]                         |
| Fig. S10A  | RS unit firing modulation [5, 10, 20, 40] degree size– during vs outside $\beta$ events                                             | 47 units               | paired t-test | $p = [0.0192, 0.0621$ (N.S), 0.198 (N.S.), $2.9 \times 10^{-5}$ ]                     |
| Fig. S10A  | RS unit firing modulation [2, 8, 32, 100] % contrast– during vs outside $\beta$ events                                              | 47 units               | paired t-test | $p = [0.148$ (N.S), 0.274 (N.S), 0.21 (N.S), $2.9 \times 10^{-5}$ ]                   |
| Fig. S10B  | FS unit firing modulation [0.01, 0.04, 0.16, 0.64] cycle per degree spatial frequency – during vs outside $\beta$ events            | 31 units               | paired t-test | $p = [0.00169, 0.0311, 0.341$ (N.S), 0.979 (N.S)]                                     |
| Fig. S10B  | FS unit firing modulation [5, 10, 20, 40] degree size– during vs outside $\beta$ events                                             | 31 units               | paired t-test | $p = [0.0454, 0.176$ (N.S.), 0.204 (N.S.), 0.0311]                                    |
| Fig. S10B  | FS unit firing modulation [2, 8, 32, 100] % contrast– during vs outside $\beta$ events                                              | 31 units               | paired t-test | $p = [0.591$ (N.S.), 0.371 (N.S), 0.0328, 0.0311]                                     |
| Fig. S10C  | RS unit firing modulation [0.01, 0.04, 0.16, 0.64] cycle per degree spatial frequency – during vs outside $\gamma$ events           | 47 units               | paired t-test | $p = [6.9 \times 10^{-5}, 1.13 \times 10^{-5}, 0.0363, 2.84 \times 10^{-4}]$          |
| Fig. S10C  | RS unit firing modulation [5, 10, 20, 40] degree size– during vs outside $\gamma$ events                                            | 47 units               | paired t-test | $p = [0.0424, 8.3 \times 10^{-4}, 2.79 \times 10^{-6}, 1.13 \times 10^{-5}]$          |
| Fig. S10C  | RS unit firing modulation [2, 8, 32, 100] % contrast– during vs outside $\gamma$ events                                             | 47 units               | paired t-test | $p = [0.598$ (N.S.), $8.16 \times 10^{-5}, 1.68 \times 10^{-6}, 1.13 \times 10^{-5}]$ |
| Fig. S10D  | FS unit firing modulation [0.01, 0.04, 0.16, 0.64] cycle per degree spatial frequency – during vs outside $\gamma$ events           | 31 units               | paired t-test | $p = [0.00113, 5.74 \times 10^{-4}, 0.26$ (N.S.), 0.00271]                            |
| Fig. S10D  | FS unit firing modulation [5, 10, 20, 40] degree size– during vs outside $\gamma$ events                                            | 31 units               | paired t-test | $p = [0.0187, 2.09 \times 10^{-4}, 8.95 \times 10^{-4}, 5.74 \times 10^{-4}]$         |
| Fig. S10D  | FS unit firing modulation [2, 8, 32, 100] % contrast– during vs outside $\gamma$ events                                             | [27, 31, 31, 31] units | paired t-test | $p = [0.0383, 5.45 \times 10^{-5}, 3.33 \times 10^{-8}, 5.74 \times 10^{-4}]$         |
| Fig. S10E  | RS unit firing modulation [0.01, 0.04, 0.16, 0.64] cycle per degree spatial frequency – sitting - during vs outside $\gamma$ events | 45 units               | paired t-test | $p = [5.46 \times 10^{-4}, 2.9 \times 10^{-6}, 0.0159, 9.92 \times 10^{-4}]$          |
| Fig. S10E  | RS unit firing modulation [5, 10, 20, 40] degree size– sitting - during vs outside $\gamma$ events                                  | 45 units               | paired t-test | $p = [0.143$ (N.S.), 0.00123, $2.77 \times 10^{-6}, 2.9 \times 10^{-6}]$              |
| Fig. S10E  | RS unit firing modulation [2, 8, 32, 100] % contrast– sitting - during vs outside $\gamma$ events                                   | 45 units               | paired t-test | $p = [0.9$ (N.S.), $4.69 \times 10^{-4}, 3.33 \times 10^{-6}, 2.9 \times 10^{-6}]$    |
| Fig. S10F  | FS unit firing modulation [0.01, 0.04, 0.16, 0.64] cycle per degree spatial frequency – sitting - during vs outside $\gamma$ events | 31 units               | paired t-test | $p = [0.00613, 7.78 \times 10^{-5}, 0.0587$ (N.S.), 0.00448]                          |

|           |                                                                                                                                     |                        |               |                                                                                              |
|-----------|-------------------------------------------------------------------------------------------------------------------------------------|------------------------|---------------|----------------------------------------------------------------------------------------------|
| Fig. S10F | FS unit firing modulation [5, 10, 20, 40] degree size– sitting - during vs outside $\gamma$ events                                  | 31 units               | paired t-test | $p = [0.0189, 6.2 \times 10^{-4}, 3.02 \times 10^{-4}, 7.78 \times 10^{-5}]$                 |
| Fig. S10F | FS unit firing modulation [2, 8, 32, 100] % contrast– sitting - during vs outside $\gamma$ events                                   | [27, 31, 31, 31] units | paired t-test | $p = [0.0379, 1.57 \times 10^{-4}, 2.76 \times 10^{-6}, 7.78 \times 10^{-5}]$                |
| Fig. S10G | RS unit firing modulation [0.01, 0.04, 0.16, 0.64] cycle per degree spatial frequency – running - during vs outside $\gamma$ events | [46, 46, 46, 43] units | paired t-test | $p = [3.21 \times 10^{-5}, 7.76 \times 10^{-5}, 0.258 \text{ (N.S.)}, 0.289 \text{ (N.S.)}]$ |
| Fig. S10G | RS unit firing modulation [5, 10, 20, 40] degree size– running - during vs outside $\gamma$ events                                  | [40, 38, 46, 46] units | paired t-test | $p = [0.0247, 0.0253, 7.17 \times 10^{-4}, 7.76 \times 10^{-5}]$                             |
| Fig. S10G | RS unit firing modulation [2, 8, 32, 100] % contrast– running - during vs outside $\gamma$ events                                   | [41, 40, 44, 46] units | paired t-test | $p = [0.641 \text{ (N.S.)}, 8.58 \times 10^{-3}, 0.00225, 7.76 \times 10^{-5}]$              |
| Fig. S10H | FS unit firing modulation [0.01, 0.04, 0.16, 0.64] cycle per degree spatial frequency – running - during vs outside $\gamma$ events | 31 units               | paired t-test | $p = [0.00118, 0.0151, 0.0864 \text{ (N.S.)}, 0.0493]$                                       |
| Fig. S10H | FS unit firing modulation [5, 10, 20, 40] degree size– running - during vs outside $\gamma$ events                                  | [26, 29, 29, 31] units | paired t-test | $p = [0.0142, 1.6 \times 10^{-4}, 0.0886 \text{ (N.S.)}, 0.0151]$                            |
| Fig. S10H | FS unit firing modulation [2, 8, 32, 100] % contrast– running - during vs outside $\gamma$ events                                   | [20, 24, 27, 31] units | paired t-test | $p = [0.627 \text{ (N.S.)}, 0.0055, 6.56 \times 10^{-4}, 0.0151]$                            |
| Fig. S11D | False Alarm Rate – V1 inactivation vs control                                                                                       | 5 mice                 | paired t-test | $P = 0.802 \text{ (N.S.)}$                                                                   |
| Fig. S11D | RMax – V1 inactivation vs control                                                                                                   | 5 mice                 | paired t-test | $P = 0.0212$                                                                                 |
| Fig. S11E | C50 – V1 inactivation vs control                                                                                                    | 5 mice                 | paired t-test | $P = 0.0376$                                                                                 |
| Fig. S12C | C50 - quiet vs running                                                                                                              | 16 mice                | paired t-test | $p = 0.0149$                                                                                 |
| Fig. S12D | False alarm rate - quiet vs running                                                                                                 | 16 mice                | paired t-test | $p = 0.0000336$                                                                              |
| Fig. S12D | Hit rate - quiet vs running                                                                                                         | 16 mice                | paired t-test | $p = 0.00000248$                                                                             |
| Fig. S12D | Hit rate at full contrast - quiet vs running                                                                                        | 16 mice                | paired t-test | $p = 0.0248$                                                                                 |
| Fig. S12E | D' - quiet vs running                                                                                                               | 16 mice                | paired t-test | $p = 0.0419$                                                                                 |
| Fig. S12E | D' at full contrast - quiet vs running                                                                                              | 16 mice                | paired t-test | $p = 0.163 \text{ (N.S.)}$                                                                   |
| Fig. S12F | Bias - quiet vs running                                                                                                             | 16 mice                | paired t-test | $p = 0.0000264$                                                                              |
| Fig. S12F | Bias at full contrast - quiet vs running                                                                                            | 16 mice                | paired t-test | $p = 0.0149$                                                                                 |

|           |                                                                                                 |         |                                                                                                              |                                                                                                                |
|-----------|-------------------------------------------------------------------------------------------------|---------|--------------------------------------------------------------------------------------------------------------|----------------------------------------------------------------------------------------------------------------|
| Fig. S13B | $\beta$ event rate on low contrast trials- response vs rejection trials                         | 16 mice | FDR corrected paired t-test                                                                                  | q = 0.05<br>Significant: none                                                                                  |
| Fig. S13C | $\gamma$ event rate on high contrast trials- response vs rejection trials                       | 16 mice | FDR corrected paired t-test                                                                                  | q = 0.05<br>Significant: none                                                                                  |
| Fig. S13D | $\beta$ event rate on high contrast trials- response vs rejection trials                        | 16 mice | FDR corrected paired t-test                                                                                  | q = 0.05<br>Significant: none                                                                                  |
| Fig. S13E | $\gamma$ event rate on no go trials- response vs rejection trials                               | 16 mice | FDR corrected paired t-test                                                                                  | q = 0.05<br>Significant: (-68) - 799ms                                                                         |
| Fig. S13F | $\beta$ event rate on no go trials- response vs rejection trials                                | 16 mice | FDR corrected paired t-test                                                                                  | q = 0.05<br>Significant: none                                                                                  |
| Fig. S13G | $\gamma$ event rate [0, <1, 1-5, >10 All] contrasts - response vs rejection trials              | 16 mice | paired t-test                                                                                                | [7.7x10 <sup>-8</sup> , 1.82x10 <sup>-5</sup> , 3.88x10 <sup>-7</sup> , 0.0868 (N.S.), 2.64x10 <sup>-9</sup> ] |
| Fig. S13G | $\gamma$ event rate [0, <1, 1-5, >10 All] contrasts - locomotion - response vs rejection trials | 16 mice | paired t-test                                                                                                | [0.0478, 0.114 (N.S.), 0.743 (N.S.), 0.805 (N.S.), 2.18x10 <sup>-6</sup> ]                                     |
| Fig. S13G | $\gamma$ event rate [0, <1, 1-5, >10 All] contrasts – quiescence - response vs rejection trials | 16 mice | paired t-test                                                                                                | [1.04x10 <sup>-6</sup> , 1.25x10 <sup>-4</sup> , 1.77x10 <sup>-5</sup> , 0.0044, 7.35x10 <sup>-9</sup> ]       |
| Fig. S13H | $\beta$ event rate [0, <1, 1-5, >10 All] contrasts - response vs rejection trials               | 16 mice | paired t-test                                                                                                | [0.0923 (N.S.), 0.103 (N.S.), 0.122 (N.S.), 0.355 (N.S.), 3.23x10 <sup>-5</sup> ]                              |
| Fig. S13H | $\beta$ event rate [0, <1, 1-5, >10 All] contrasts - locomotion - response vs rejection trials  | 16 mice | paired t-test                                                                                                | [0.404 (N.S.), 0.0217, 0.432 (N.S.), 0.422 (N.S.), 0.00251]                                                    |
| Fig. S13H | $\beta$ event rate [0, <1, 1-5, >10 All] contrasts – quiescence - response vs rejection trials  | 16 mice | paired t-test                                                                                                | [0.128 (N.S.), 0.0577 (N.S.), 0.0246, 0.00357, 2.54x10 <sup>-4</sup> ]                                         |
| Fig. S14A | R <sup>2</sup> Logistic regression                                                              | 16 mice | Fisher's method (over mice) - Likelihood Ratio Tests against null model (each mouse)                         | PresStim:1.71x10 <sup>-14</sup> ; Init:0; PreLick:0; PostLick:0; FullStim:0                                    |
| Fig. S14B | D' Logistic regression                                                                          | 16 mice | Fisher's method (over mice) - Likelihood Ratio Tests against null model (each mouse)                         | PresStim:2.44x10 <sup>-15</sup> ; Init:0; PreLick:0; PostLick:0; FullStim:0                                    |
| Fig. S14C | $\beta$ event contribution                                                                      | 16 mice | Fisher's method (over mice) – Likelihood Ratio Tests against full model after parameter removal (each mouse) | PresStim:1.75x10 <sup>-14</sup> ; Init:0; PreLick:0; PostLick:0; FullStim:0                                    |
| Fig. S14C | $\gamma$ event contribution                                                                     | 16 mice | Fisher's method (over mice) – Likelihood Ratio Tests against full model after parameter removal (each mouse) | PresStim:0.048 ; Init:0; PreLick:0; PostLick:0; FullStim:0                                                     |
| Fig. S14D | $\beta$ event contribution                                                                      | 16 mice | Fisher's method (over mice) - Shuffled Parameter Value Tests (each mouse)                                    | PresStim:0 ; Init:0; PreLick:0; PostLick:0; FullStim:0                                                         |
| Fig. S14D | $\gamma$ event contribution                                                                     | 16 mice | Fisher's method (over mice) - Shuffled Parameter Value Tests (each mouse)                                    | PresStim:0.16 ; Init:0; PreLick:0; PostLick:0; FullStim:0                                                      |
| Fig. S14F | R <sup>2</sup> Logistic regression                                                              | 16 mice | Fisher's method (over mice) - Likelihood Ratio Tests against null model (each mouse)                         | NoGo: 0; <1:0; 1-5:0; 10-100:3.44x10 <sup>-15</sup> ; All:0                                                    |
| Fig. S14G | D' Logistic regression                                                                          | 16 mice | Fisher's method (over mice) - Likelihood Ratio Tests against null model (each mouse)                         | NoGo: 0; <1:0; 1-5:0; 10-100:3.44x10 <sup>-15</sup> ; All:0                                                    |

|           |                                                                                          |         |                                                                                                                 |                                                                            |
|-----------|------------------------------------------------------------------------------------------|---------|-----------------------------------------------------------------------------------------------------------------|----------------------------------------------------------------------------|
| Fig. S14H | $\beta$ event contribution                                                               | 16 mice | Fisher's method (over mice)<br>– Likelihood Ratio Tests against full model after parameter removal (each mouse) | NoGo: 0; <1:3.43x10 <sup>-9</sup> ; 1-5:0; 10-100:0.647; All:0             |
| Fig. S14H | $\gamma$ event contribution                                                              | 16 mice | Fisher's method (over mice)<br>– Likelihood Ratio Tests against full model after parameter removal (each mouse) | NoGo: 0; <1:0; 1-5:0; 10-100:1.13x10 <sup>-15</sup> ; All:0                |
| Fig. S14I | $\beta$ event contribution                                                               | 16 mice | Fisher's method (over mice)<br>- Shuffled Parameter Value Tests (each mouse)                                    | NoGo: 0; <1:0; 1-5:0; 10-100:0.733; All:0                                  |
| Fig. S14I | $\gamma$ event contribution                                                              | 16 mice | Fisher's method (over mice)<br>- Shuffled Parameter Value Tests (each mouse)                                    | NoGo: 0; <1:0; 1-5:0; 10-100:0; All:0                                      |
| Fig. S14K | R <sup>2</sup> Logistic regression                                                       | 16 mice | Fisher's method (over mice)<br>- Likelihood Ratio Tests against null model (each mouse)                         | PresStim:0.0551 ; Init:0; PreLick:0; PostLick:0; FullStim:0                |
| Fig. S14L | D' Logistic regression (sitting)                                                         | 16 mice | Fisher's method (over mice)<br>- Likelihood Ratio Tests against null model (each mouse)                         | PresStim:0.0143 ; Init:0; PreLick:0; PostLick:0; FullStim:0                |
| Fig. S14M | $\beta$ event contribution (sitting)                                                     | 16 mice | Fisher's method (over mice)<br>– Likelihood Ratio Tests against full model after parameter removal (each mouse) | PresStim:0.405 ; Init:0; PreLick:0; PostLick:0; FullStim:0                 |
| Fig. S14M | $\gamma$ event contribution (sitting)                                                    | 16 mice | Fisher's method (over mice)<br>– Likelihood Ratio Tests against full model after parameter removal (each mouse) | PresStim:7.54.10 <sup>-3</sup> ; Init:0; PreLick:0; PostLick:0; FullStim:0 |
| Fig. S14N | $\beta$ event contribution (sitting)                                                     | 16 mice | Fisher's method (over mice)<br>- Shuffled Parameter Value Tests (each mouse)                                    | PresStim:0.47 ; Init:0; PreLick:0; PostLick:0; FullStim:0                  |
| Fig. S14N | $\gamma$ event contribution (sitting)                                                    | 16 mice | Fisher's method (over mice)<br>- Shuffled Parameter Value Tests (each mouse)                                    | PresStim:0.032 ; Init:0; PreLick:0; PostLick:0; FullStim:0                 |
| Fig. S15A | $\gamma$ event rate around response - free reward 1 – unrewarded response vs baseline    | 7 mice  | FDR corrected Fisher's method on t-test                                                                         | q = 0.05<br>Significant: none                                              |
| Fig. S15A | $\gamma$ event rate around response – visual task – unrewarded response vs baseline      | 7 mice  | FDR corrected Fisher's method on t-test                                                                         | q = 0.05<br>Significant: none                                              |
| Fig. S15A | $\gamma$ event rate around response - free reward 2 – unrewarded response vs baseline    | 7 mice  | FDR corrected Fisher's method on t-test                                                                         | q = 0.05<br>Significant: none                                              |
| Fig. S15A | $\gamma$ event rate around response - free reward 1 – rewarded response vs baseline      | 7 mice  | FDR corrected Fisher's method on t-test                                                                         | q = 0.05<br>Significant: none                                              |
| Fig. S15A | $\gamma$ event rate around response – visual task – rewarded response vs baseline        | 7 mice  | FDR corrected Fisher's method on t-test                                                                         | q = 0.05<br>Significant: -188-700ms                                        |
| Fig. S15A | $\gamma$ event rate around response - free reward 2 – rewarded response vs baseline      | 7 mice  | FDR corrected Fisher's method on t-test                                                                         | q = 0.05<br>Significant: none                                              |
| Fig. S15B | $\gamma$ event rate around response - free reward – rewarded response vs baseline        | 7 mice  | FDR corrected Fisher's method on t-test                                                                         | q = 0.05<br>Significant: none                                              |
| Fig. S15B | $\gamma$ event rate around response – forced visual task – rewarded response vs baseline | 7 mice  | FDR corrected Fisher's method on t-test                                                                         | q = 0.05<br>Significant: -288, -283(-138), 59, 66-700ms                    |



|           |                                                                                   |        |                                         |                                     |
|-----------|-----------------------------------------------------------------------------------|--------|-----------------------------------------|-------------------------------------|
| Fig. S15B | $\gamma$ event rate around response – visual task – rewarded response vs baseline | 7 mice | FDR corrected Fisher's method on t-test | q = 0.05<br>Significant: -265-700ms |
| Fig. S15C | $\gamma$ event rate around response - free reward – rewarded response vs baseline | 4 mice | FDR corrected Fisher's method on t-test | q = 0.05<br>Significant: none       |
| Fig. S15C | $\gamma$ event rate around response – audio task – rewarded response vs baseline  | 4 mice | FDR corrected Fisher's method on t-test | q = 0.05<br>Significant: none       |

N.S. : non-significant

## Material & Methods

### *Animals*

Male and female mice were kept on a 12h light/dark cycle, provided with food and water ad libitum, and housed individually following headpost implants. All mice except those used for optogenetics were C57Bl/6. A subset of mice used for optogenetic experiments were PV-ires-Cre mice (strain# 008069, Jackson Laboratory). All animal handling and experiments were performed according to the ethical guidelines of the Institutional Animal Care and Use Committee of the Yale University School of Medicine.

### *Surgery*

Mice were anesthetized with isoflurane (1.5% in oxygen) and maintained at 37°C for the duration of the surgery. Analgesia was provided with subcutaneous injections of Carprofen (5mg/kg) and Buprenorphine (.05mg/kg). Lidocaine (1% in 0.9% NaCl) was injected under the scalp to provide topical analgesia. Eyes were protected from desiccation with ointment (Puralube). The scalp was resected and the skull cleaned with Betadine. A surgical screw was implanted on the skull between the eyes and nuts were glued to the skull above the bregma suture, allowing the fixation of a headplate with bolts. For chronic electrophysiology, 2 craniotomies were performed respectively above V1 on the left hemisphere (~0.15mm diameter; 2.5mm laterally from lambda) and above the cerebellum (0.4mm diameter; ~2mm posterior to lambda). An A16 probe with a CM16 connector (Neuronexus) was lowered into V1. Ground and reference wires were inserted above the cerebellum. For acute electrophysiology, a circular plastic ring (~2.5mm diameter) was glued on the skull above V1. The skull inside the ring was protected with cyanoacrylate. For optogenetic manipulations, craniotomies were performed above V1 on each hemisphere, 1µl of AAV5-ef1α-DIO-ChR2-eYFP (Addgene) was injected at a depth of 300µm in each hemisphere and optical canulae (Doric Lenses Inc.) were positioned above the dura. Craniotomies were protected with Gelfoam (Pfizer), and all implants were affixed to the skull with dental cement (Metabond, Parkell Industries).

### *Electrophysiology*

Mice were habituated to handling and head fixation for 3-5 days prior to electrophysiological recordings. For chronic recordings, mice were head-fixed on a wheel (Vinck et al., 2015) and their implants were connected to the recording apparatus (DigitalLynx system, Neuralynx).

For acute silicon probe and patch clamp recordings, two small craniotomies (~0.1mm, <0.1mm apart) were performed above V1 under isoflurane anesthesia. Analgesic was provided as described above and mice were moved back for >2h in their home cage to recover from anesthesia. Mice were head-fixed on the wheel. The ring situated above V1 was filled with artificial cerebrospinal fluid (ACSF; in mM: 135 NaCl, 5 KCl, 5 HEPES, 1 MgCl<sub>2</sub>, 1.8 CaCl<sub>2</sub> [adjusted to pH 7.3 with NaOH]), an AgCl reference electrode placed in the bath and an A16 probe (Neuronexus) was lowered into V1. Glass pipettes (4–6 MΩ) were pulled from borosilicate capillaries (Outer diameter: 1.5mm; Inner diameter 0.86; Sutter Instrument) and filled with an internal solution (in mM: 135 potassium gluconate, 4 KCl, 10 HEPES, 10 phosphocreatine, 4 MgATP, 0.3 Na<sub>3</sub>GTP, [adjusted to pH 7.3 with KOH; osmolarity adjusted to 300 mOsm]). Pipettes were lowered into V1 and whole cell patch clamp configurations were obtained at depth ranging from 164 to 742μm. After achieving intracellular access, a minimum delay of 5 minutes was included before recording to allow cortical activity to recover normal dynamics. Intracellular recordings were amplified with a Multiclamp 700 B amplifier (Molecular Devices). In all experiments, pupil (Vinck et al., 2015) and facial motion (Stringer et al., 2019) were recorded at 10Hz using an infrared camera (FLIR). Local Field Potentials, wheel motion, and timing signals for face movies, visual stimulus, and behavior were acquired at a 40KHz sampling rate.

#### *Visual stimulation and behavior hardware*

Visual stimuli were generated using the Psychtoolbox Matlab extension (Kleiner et al., 2007) and displayed on a 17" by 9.5" monitor situated 20cm in front of the animal (Visual Detection task) or 15 cm from the right eye (all other behavioral tasks; passive visual stimulation). Screen display was linearized and maximum luminance was adjusted to ~140 cd.sr/m<sup>2</sup>. An iso-luminant grey background was displayed between visual stimuli. Task-related actions were implemented through sensors and actuators interfaced with a microcontroller (Arduino Due; Teensy 3.2) connected to a computer running custom routines in Matlab. Waterspouts were positioned using a servomotor (Hi-tec). Responses were detected through an optical sensor (Optex-FA) and water delivery was controlled using solenoid valves (Asco). When behavior was performed during electrophysiological recordings, timing signals for spout movement, response, and reward delivery were sent from the microcontroller to analog ports on the DigitalLynx system.

#### *Visual response measurements*

The visual response of single units was tested using vertical gratings drifting leftward with a 1Hz temporal frequency and centered on the receptive field at the recording site. Gratings were

presented for 3s and separated by a 2s interstimulus interval. Unit responses properties were investigated at all combinations of 4, 8, 32 and 100% contrasts, 0.01, 0.04, 0.16 and 0.64 cycle/degree spatial frequencies, and 10-, 20-, 40- and 80-degree diameters (64 combinations total).

### *Behavioral experiments*

For behavioral training, mice were water rationed and maintained between 82% and 88% of their initial weight. Reward consisted of 3 $\mu$ l water droplets. All visual stimuli were full-screen drifting gratings with a spatial frequency 0.04 cycle/deg and temporal frequency of 2Hz and were displayed for 1 second. Auditory stimuli consisted of pure tones at 2KHz. On trials where mice responded by licking, the stimulus was displayed for an additional 2 seconds during reward consumption.

*Visual detection task:* Training was divided into 5 stages. **1.** Mice were first trained to collect water freely from the waterspout. Reward was given at regular intervals. Mice were moved to the next stage when they made 100 responses in a 20-minute session. **2.** Mice were habituated to the trial structure and to associate reward to high-contrast (100%) visual stimuli. The waterspout was moved within reach and after a 4s delay, a pure tone (4kHz, 200ms) signaled the onset of a trial. Visual stimuli were displayed after a randomized interval (0.5 to 1.2s) and a reward was delivered at stimulus onset. Mice could collect an additional reward if they licked during the visual stimulus. The spout was moved out of reach at the end of trial for an additional interval (1.5 to 3.5s). Mice were moved to the next stage after two 30-minute sessions. **3.** Mice had to lick during visual stimulus presentation (100% contrast) to receive a reward. Mice were moved to the next stage when then responded correctly on more than 80% of trials within a 30-minute session. **4.** No-go trials were introduced. Stimuli were omitted after the tone on 30% of trials. If animals made a response when stimuli were not present on the screen, the waterspout was moved away, and mice incurred a 10s timeout. Mice were moved to the next stage when their Hit rate was >80% and their false alarm rate <20%. Sessions lasted 45 minutes. **5.** Contrast was varied to test psychophysical performance. Task structure was otherwise identical to stage 4.

To test the role of V1 in task performance, the heterozygous offspring of PV-ires-Cre mice (strain# 008069, Jackson Laboratory) were bilaterally injected with 1 $\mu$ l of AAV5-Ef1a-DIO-Chr2-eYFP viral vector (titer:  $\sim 10^{12}$  vg/mL, Addgene) and implanted with optic canulae (Doric Lenses Inc.) as described above. Mice were trained on the visual detection task until stage 5. After 5 days on stage 5, and no less than 30 days after implantation, V1 was inactivated on 30% of trials with

bilateral optogenetic activation of parvalbumin expressing interneurons. Light pulses (55ms, 10Hz) were delivered through an insulated multi-mode optical fiber (200 $\mu$ m diameter, 0.53 NS, Thorlabs) coupled to a 473nm solid state laser (Opto Engine LLC). Laser power was adjusted to produce an output of  $\sim$ 110mW/mm<sup>2</sup>. Pulse timing was controlled through a shutter (Thorlabs). Pulse trains started 300ms before stimulus onset and were maintained until the end of the trial.

To investigate how gamma event rate at response time depended on reward contingencies we used training schedules consisting of combinations of the following paradigms:

*Free reward paradigm:* No stimuli were displayed. Mice were given rewards at Poisson-distributed time intervals ( $\lambda$ = 10s) to ensure a flat hazard rate. Lick responses made at any time led to additional rewards with an 80% probability.

*Visual paradigm:* Reward were given only when lick responses were made during visual stimuli. Stimuli appeared on the screen at Poisson distributed time intervals ( $\lambda$ = 9s).

*Auditory paradigm:* Rewards given were given only when lick responses were made during auditory stimuli. The task structure was otherwise identical to the visual paradigm.

*Passive visual paradigm:* Rewards were passively given at the onset of visual stimuli. An additional reward was given upon lick response. The task structure was otherwise identical to the visual paradigm.

Training schedules were always initiated with the free reward paradigm in mice having no prior experience in behavioral experiments other than habituation to head-fixation and handling.

### *Preprocessing*

Data were analyzed in Matlab 2018b (Mathworks) using custom scripts. All time-series were down-sampled to 2KHz (patch clamp recording) or 1KHz (chronic recordings) and aligned. Local field potential (LFP) recordings were high-pass filtered at 1Hz using a 2nd order Bessel filter and z-scored across channels. LFP channels were mapped onto cortical layers using the current source density (CSD) profile of visual responses (Fig. S1). Recordings of membrane potential (Vm) were curated using a custom-made procedure to delineate epochs suitable for processing. Epochs were retained if (1) spike threshold was within -40 +/- 2mV, (2) spike peak was above -20mV, (3) Vm values outside spikes stayed in the [-85 -40] mV range. Junction potentials were not corrected but were estimated as -14.9mV as described previously (Perrenoud et al., 2016). For event-triggered averages of Vm, spikes were removed [-2 to 5] ms from peak and missing values were interpolated with cubic splines. Pupil diameter was measured from movies with a

custom procedure (Vinck et al., 2015). The first principal component of whisker pad motion energy was computed from the same movie using FaceMap (Stringer et al., 2019). Pupil diameter and facial motion were interpolated and aligned to the other time series. Epochs of running and whisking activity were defined using a change point algorithm detecting local changes in the mean and variance of running speed and whisker pad motion (Vinck et al., 2015). Briefly, moving standard deviations of speed and facial motion energy were computed with a defined temporal window. The length  $t$  of this window determines the temporal resolution of the changepoint analysis and was set to 4s for running speed and 500ms for facial motion. A first estimate of locomotion/whisker motion onset/offset times were then taken as the time when the moving standard deviations exceeded/ fell below 20% of its range above minimum. Estimates were refined in a window  $t$  around each onset/offset time by computing the time points corresponding to the maximum of the  $t$ -windowed moving forward/backward Z-score.

### *Single unit clustering*

Single units were extracted from LFP recording using `spikedetekt` and clustered using `klustakwik2` (Rossant et al., 2016). Clusters were visualized and sorted using the `phy-gui` (<https://github.com/cortex-lab/phy>) together with a custom matlab GUI allowing to compute quality metrics. Single-unit clusters were generally retained if less than 0.2% of inter-spike intervals were inferior to 2ms and if their isolation distance and L-Ratio were superior to 15 and inferior to 0.01 respectively (Schmitzer-Torbert et al., 2005). Isolation distance and L-Ratio are biased by spike number so deviations to those rules were occasionally allowed for unit of low firing rate if their waveform was well above noise.

Fast spiking (FS) and regular spiking (RS) units were defined as described previously (Vinck et al., 2015). Briefly, the average normalized waveforms of all units were clustered with the k-means method based on 2 parameters: peak to trough time, and repolarization (i.e. defined as the value of the normalized waveform 0.45ms after peak). FS units had higher repolarization values and shorter peak-to-trough times than RS units.

### *CBASS*

CBASS (Clustering Band-limited Activity by State and Spectral features) ties a power increase in a defined frequency band (i.e., gamma (30-80Hz)) during a particular state (i.e., running) to the occurrence of defined events in the temporal domain. A detailed description is available in the appendix below and implementations in matlab and python are available on (<https://github.com/cardin-higley-lab/CBASS>). Briefly, the multichannel LFP is filtered in the band

of interest and candidate events are selected at the troughs of the filtered signal in a reference channel (Fig. 1D, Fig. S2A-B). The spectrotemporal dynamics underlying each candidate event are parameterized using the real and imaginary part of the analytical representation (matlab function *Hilbert*) of the filtered signal in each channel (Fig. S2C). Candidate events form a cloud in this parametric space where neighbors have similar spectro-temporal dynamics (Fig. S2D). The event cloud is split randomly into  $n$  partitions and a binomial test is performed in each partition to determine if events happen during the state of interest (i.e. running) at higher frequencies than overall. Partitioning is repeated  $N$  time (Fig. S2E). A state enrichment score is calculated for events as the fraction of time they fell into an enriched partition (Fig. S2F). An optimization procedure is then applied to find the threshold yielding the most significant distance between events having a low and a high enrichment score in the feature space (Fig. S2G). Events above threshold are retained (Fig. S2H). Here we used  $n = 20$  partitions and  $N = 1000$ . Different settings for these parameters have only a marginal influence on the result of the procedure.

#### *Layer alignment of LFP and CSD across recordings*

To compute the average field potential around CBASS events across recordings, the LFP was linearly interpolated across channels to a common grid of laminar position (Fig. 1F, Fig. S4D). The CSD was derived as the second spatial derivative of the LFP across interpolated laminar positions.

#### *Comparison of network activity within and outside CBASS event cycles*

CBASS events are aligned to the trough of the band-pass filtered LFP in a reference channel. We defined each event's boundaries as the peaks surrounding the event's trough. Peak and troughs were determined as the 0 and  $\pi$  valued time points of the argument (matlab function *abs*) of the analytic representation (matlab function *hilbert*). Activity inside the event boundaries thus fell within a cycle centered on the trough. Epochs during and outside all CBASS event cycles were pooled separately and compared.

#### *Spike distribution around CBASS events*

Spike distribution around CBASS events was computed as follows. For a selected unit, the lag separating each spike from the nearest CBASS events was estimated. A histogram of lag values was then computed and normalized by total spike count. Histograms were averaged across units.

#### *Event rate normalization*



Normalized rates for CBASS-detected events were calculated as follows. A baseline event rate  $p$  was computed over samples. The variance of the rate over a window of  $n$  samples was estimated assuming a binomial distribution as  $s_n^2 = np(1 - p)$ . The normalized rate of events over a window of  $n$  samples was then taken as  $r_n = (r - p)/\sqrt{s_n^2}$  where  $r$  is the event rate over samples and can be thought of as the number of standard deviations away from baseline.

#### *Unit firing modulation by visual stimulation*

Modulation of single-unit action potential firing by visual stimulation was calculated similarly to normalized event rate. A baseline firing rate  $r$  was computed over samples outside visual stimuli. The variance of the rate over a window of  $n$  samples was estimated assuming a binomial distribution as  $s_n^2 = nr(1 - r)$ . The modulation of event firing for each stimulus modality samples was then taken as  $r_s = (rvis - r)/\sqrt{s_s^2}$  where  $rvis$  is the visually evoke firing rate and  $s$  is the number of samples within the visual stimulation. Firing modulation can be thought of as the number of standard deviations away from the mean baseline rate. The baseline firing rate of each unit was computed separately within and outside CBASS event cycles.

#### *Spectral analysis*

The spectral power of a given time series was derived with Welch's method. Each channel was divided into 500ms overlapping segments (75% overlap). Each segment was multiplied by a Hamming window and their Fourier transform was computed (matlab function *fft*). Power was derived as 10 times log10 of the squared magnitude of the Fourier Transform and expressed in dB. Power was averaged over segment and channels.

The spectral power of event-triggered averages was derived with a minimum bias multi-taper estimate (Riedel and Sidorenko, 1995). This differs from a classical multi-taper estimate in that Slepian tapers are replaced by a sinusoidal tapers sequence defined as:

$$s_k = \sqrt{2/N + 1} \sin(\pi nk / N + 1)$$

where  $N$  is the number of samples in the triggered average,  $n$  is the sample number and  $k$  is the order of the taper. Sinusoidal tapers produce a spectral concentration almost comparable to that achieved with a Slepian sequence while markedly reducing local bias. The number of tapers was chosen to yield a bandwidth of .8Hz following the formula:  $K = \text{round}((4\pi NB / r) - 1)$  where  $B$  is the bandwidth and  $r$  is the sample rate. Triggered averages were multiplied by each taper. Spectral power was then computed as described above and averaged over tapers.

For coherence and spike phase locking estimation, spectro-temporal representations were first derived either for a set of frequencies using a wavelet transform (matlab function *cwt*) and a Morlet wavelet (matlab identifier *cmor1-2*) or across a full frequency band by computing the analytical representation of the filtered signal (matlab function *Hilbert*). Coherence was defined as:

$$\widehat{\kappa}_f = \frac{|\sum_n \mathbf{S}_1(\mathbf{n}) \cdot \mathbf{S}_2^*(\mathbf{n})|^2}{\sum_n |\mathbf{S}_1(\mathbf{n})|^2 \cdot \sum_n |\mathbf{S}_2(\mathbf{n})|^2}$$

where  $\mathbf{S}_k(\mathbf{n})$  is the spectro-temporal representation of signal  $k$  for sample  $\mathbf{n}$  at the frequency  $f$ .  $\kappa_f$  has a positive bias of  $(1 - \kappa_f)/N$  where  $N$  is the number of samples. The bias was subtracted from the estimate. Spike phase locking was estimated using the Pairwise Phase Consistency (Vinck et al., 2010) defined as:

$$\widehat{PPC}_f = \sum_n^m \sum_m^N \frac{2 \cdot \cos(\theta_n - \theta_m)}{N(N - 1)}$$

where  $\theta_k$  is the phase of the signal for frequency  $f$  at the time of spike  $k$  and  $N$  is the total number of spikes. PPC provides an unbiased estimate of spike phase locking. However, estimate can be noisy if the spike number is inferior to 250. Thus, population estimates of PPC were derived by pooling spikes from all selected neurons and the variance over neurons was estimated with a leave-one-out Jackknife procedure (Shao and Wu, 1989).

### *Logistic regression*

Logistic regressions of trial outcome in our visual detection task were performed using the matlab function *glmfit* and a logit transfer function. Logistic regression models return an estimated of the probability of response for each trial. The log-likelihood of regression models was calculated by summing the log-likelihood of each trial's outcome given the probabilities returned by the model and assuming a Bernoulli distribution. Model performances were tested using likelihood ratio tests and quantified with McFadden's R-Squared and a sensitivity metric ( $d'$ ). McFadden's R-Squared was defined as:

$$R^2 = 1 - \frac{LL_{model}}{LL_0}$$

where  $LL_{model}$  represents the log-likelihood of the regression and  $LL_0$  represent the log likelihood of the null model (i.e. the likelihood of the data assuming that all trials have an equal probability of success corresponding to the mean hit rate). Sensitivity was defined as

$$d' = Z(P_{resp}) - Z(P_{rej})$$

where  $Z$  is the inverse standard normal distribution and  $P_{resp}$  and  $P_{rej}$  represent the average probability of response returned by the model for response and rejection trials respectively. The impact of each regressors was assessed in two ways. 1. Regression was recomputed 1000 times after shuffling regressor's values over trials. A p-value for the significance of each regressor's impact was derived as the percentage of R-Squared on shuffled values superior to the actual R-Squared of the model. 2. Regression models was compared to a model where each regressor was taken away and the significance of the regressor's contribution was estimated with a likelihood ratio test. The magnitude of a regressor's contribution was measured using the increase in deviance. Deviance represents the difference of predictive power from a saturated model giving a perfect prediction (i.e. the likelihood of each trial is 1). It is defined as:

$$D = 2 * (LL_{model} - LL_{sat})$$

where  $LL_{model}$  is the log-likelihood of the model and  $LL_{sat}$  is the log-likelihood of the saturated model. Significance was estimated separately for each mouse. Statistical significance across mice was assessed by pooling p-values using Fisher's method.

### Statistics

Statistics in each figure panel are described in Supplementary Table 1. Except where otherwise noted, tests were performed using mice as the statistical unit. Multiple comparisons were corrected using Benjamini-Yekutieli's procedure for false discovery rate (Benjamini and Yekutieli, 2001).

### Reference

- Benjamini, Y., Yekutieli, D., 2001. The control of the false discovery rate in multiple testing under dependency. *Ann. Statist.* 29, 1165–1188. <https://doi.org/10.1214/aos/1013699998>
- Kleiner, M., Brainard, D., Pelli, D., Ingling, A., Murray, R., Broussard, C., 2007. What's new in psychtoolbox-3. *Perception* 36, 1–16.
- Perrenoud, Q., Pennartz, C.M.A., Gentet, L.J., 2016. Membrane Potential Dynamics of Spontaneous and Visually Evoked Gamma Activity in V1 of Awake Mice. *PLoS Biol.* 14, e1002383. <https://doi.org/10.1371/journal.pbio.1002383>

- Riedel, K.S., Sidorenko, A., 1995. Minimum bias multiple taper spectral estimation. *IEEE Transactions on Signal Processing* 43, 188–195. <https://doi.org/10.1109/78.365298>
- Rossant, C., Kadir, S.N., Goodman, D.F.M., Schulman, J., Hunter, M.L.D., Saleem, A.B., Grosmark, A., Belluscio, M., Denfield, G.H., Ecker, A.S., Tolias, A.S., Solomon, S., Buzsáki, G., Carandini, M., Harris, K.D., 2016. Spike sorting for large, dense electrode arrays. *Nat Neurosci* 19, 634–641. <https://doi.org/10.1038/nn.4268>
- Schmitzer-Torbert, N., Jackson, J., Henze, D., Harris, K., Redish, A.D., 2005. Quantitative measures of cluster quality for use in extracellular recordings. *Neuroscience* 131, 1–11. <https://doi.org/10.1016/j.neuroscience.2004.09.066>
- Shao, J., Wu, C.F.J., 1989. A General Theory for Jackknife Variance Estimation. *Ann. Statist.* 17, 1176–1197. <https://doi.org/10.1214/aos/1176347263>
- Stringer, C., Pachitariu, M., Steinmetz, N., Reddy, C.B., Carandini, M., Harris, K.D., 2019. Spontaneous behaviors drive multidimensional, brainwide activity. *Science*. <https://doi.org/10.1126/science.aav7893>
- Vinck, M., Batista-Brito, R., Knoblich, U., Cardin, J.A., 2015. Arousal and locomotion make distinct contributions to cortical activity patterns and visual encoding. *Neuron* 86, 740–754. <https://doi.org/10.1016/j.neuron.2015.03.028>
- Vinck, M., van Wingerden, M., Womelsdorf, T., Fries, P., Pennartz, C.M.A., 2010. The pairwise phase consistency: a bias-free measure of rhythmic neuronal synchronization. *Neuroimage* 51, 112–122. <https://doi.org/10.1016/j.neuroimage.2010.01.073>

## Appendix - CBASS: Detailed Methods

This documentation is also available on (<https://github.com/cardin-higley-lab/CBASS/wiki>)

LFP power often increases in a specific frequency band during specific events or behavioral states. For example, in the visual cortex of mouse, beta (15-30Hz) increases during visual stimulation while gamma (30-80Hz) increases during running (Fig. 1).

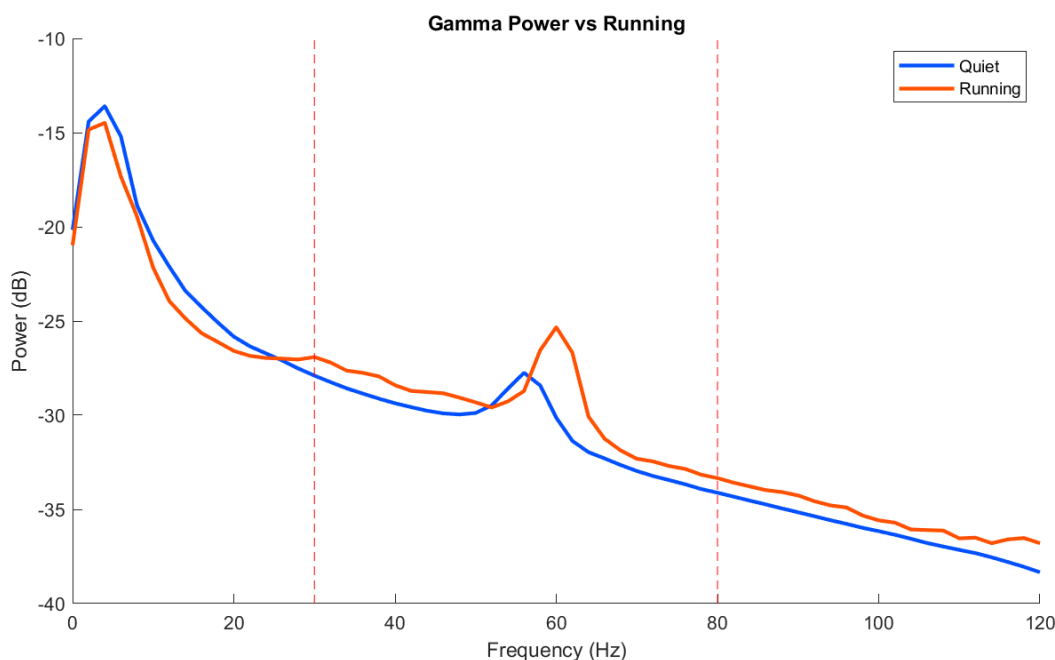

Figure 1

This is often interpreted as an increase in sustained oscillatory activity. However, due to the stochastic nature of neuronal dynamics, we reasoned that this might reflect a higher occurrence of discrete bouts of patterned activity (i.e. events) having energy in that frequency band. To test this idea and uncover the network dynamics underlying these events, we developed a method capable of detecting them in the time domain. This method, called **Clustering Band-limited Activity by State and Spectro-temporal feature (CBASS)**, takes advantage of laminarly distributed multichannel LFP recordings to identify spatio-temporal motifs of LFP activity across channels. This identification is based on 2 criteria: **1)** motifs have energy in the frequency band of interest and **2)** their occurrence increases during the selected behavioral state. The method can be divided into 3 steps

1. **extraction**, where a set of candidate events is obtained from multichannel LFP recordings in the frequency band of interest
2. **probability scoring**, where we compute a score reflecting the probability of each candidate event to occur during the state of interest based on spectro-temporal features
3. **thresholding**, where find a partition between high and low score events that maximize their distance in the spectro-temporal feature space

### Extraction

The first step of CBASS extracts candidate network events in the selected frequency band and represents them in a parametric space. Each channel of the LFP (Fig. 2 left) is band-pass filtered in the frequency band of interest (Fig. 2 center). In our case, we used zero-phase digital filtering with a 2nd order Butterworth filter (Matlab functions *filtfilt* and *butter* or their corresponding functions in the Scipy package). Then, we compute the analytical representation of the filtered signal (Matlab function *hilbert* or the corresponding function in Scipy). The analytic representation of a real signal  $\mathbf{s}(t)$  is a complex sequence  $\mathbf{s}_a(t)$  given by:

$$\mathbf{s}_a(t) = \mathbf{s}(t) + i * \mathbf{H}[\mathbf{s}(t)]$$

where  $\mathbf{H}[\mathbf{s}(t)]$  is the Hilbert transform of  $\mathbf{s}(t)$ . Thus, the real part of the analytical signal is the signal itself and its imaginary part is given by its Hilbert transform. For a band limited time series like the filtered LFP,  $\mathbf{s}_a(t)$  has the very useful properties that its norm and complex argument respectively correspond to the instantaneous amplitude envelope and instantaneous phase of  $\mathbf{s}(t)$  (the norm can be computed with the Matlab function *abs* and the complex argument with the function *angle*. Corresponding functions can be found in the Numpy package). Thus, the analytical signal gives a rich representation of LFP activity at the band of interest and eliminates frequency redundancy problems related to the Fourier transform [1].

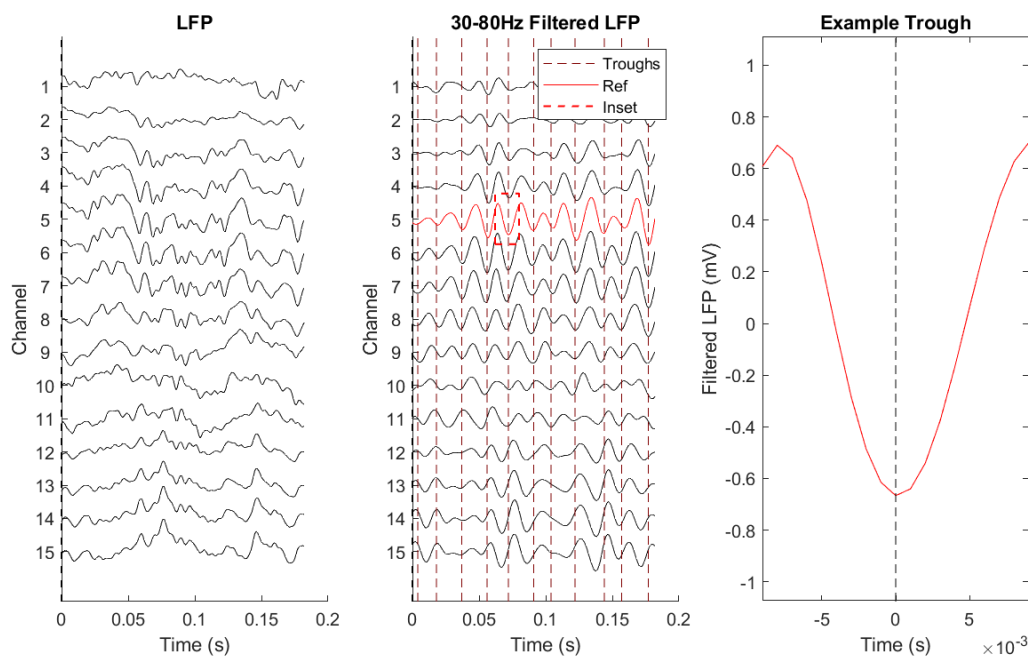

Figure 2

To constrain this representation and make it more amenable to clustering, we select the time points (i.e. events) corresponding to the trough of band passed activity in a reference channel (Fig. 2 center), troughs are the time points where the argument of the analytical signal -i.e. the phase is  $\pi$ -valued). Each event is then represented in a parametric space where parameters correspond to the real and imaginary parts of the analytic signal in each channel. Thus, the position of each event in this parametric space gives information about the amplitude and phase of LFP in each channel at the time of troughs in the reference. This offers a comprehensive but constrained representation of the propagation of LFP activity across channels in the band of interest. In our case, the reference was chosen as the channel closest to 400 $\mu$ m of cortical depth (i.e. layer IV, Fig. 2 center - red channel). Different choices of reference did not affect the qualitative outcome of the procedure but resulted in motifs being shifted in time reflecting the

propagation of activity between channels. To follow usual conventions in clustering, we designate the data matrix containing the position of each event in the parametric space as  $\mathbf{X}$ . Each element  $\mathbf{X}(i, j)$  corresponds to the value of parameter  $j$  for event  $i$  (Fig. 3).

$$\begin{array}{c}
 \begin{array}{c}
 \text{event 1} \rightarrow \\
 \text{event 2} \rightarrow \\
 \\
 \\
 \\
 \\
 \\
 \\
 \\
 \\
 \end{array}
 \mathbf{X} =
 \begin{array}{c}
 \begin{array}{c}
 \text{Real part of } s_a(t) \\
 \text{channels 1 to } m
 \end{array}
 \quad
 \begin{array}{c}
 \text{Immaginary part of } s_a(t) \\
 \text{channels 1 to } m
 \end{array}
 \end{array}
 \begin{array}{c}
 \left[ \begin{array}{ccccccc}
 a_{1,1} & a_{1,2} & \dots & a_{1,m} & a_{1,m+1} & \dots & a_{1,2m} \\
 a_{2,1} & a_{2,2} & \dots & a_{2,m} & a_{2,m+1} & \dots & a_{2,2m} \\
 a_{3,1} & a_{3,2} & \dots & a_{3,m} & a_{3,m+1} & \dots & a_{3,2m} \\
 \vdots & \vdots & & \vdots & \vdots & & \vdots \\
 \\
 a_{n,1} & a_{n,2} & \dots & a_{n,m} & a_{n,m+1} & \dots & a_{n,2m}
 \end{array} \right]
 \end{array}
 \end{array}$$

Figure 3

### Probability scoring

We then seek to estimate how likely it is for an event to fall in a region of  $\mathbf{X}$  where the state of interest happens more than by chance.  $\mathbf{X}$  can be conceived as a manifold in a parametric space (Fig. 4 left). Our goal is thus to map variations in the probability of occurrence of the selected state over this manifold. To achieve this, we repeat the following steps

1. The manifold is first partitioned into an arbitrary number  $k$  of clusters using the initialization step of the k-means algorithm. Briefly  $k$  centers are drawn at random from the events in  $\mathbf{X}$ . All events are then grouped according to which center lies closest to them. These clusters can be thought of as non-overlapping regions of the feature space.
2. We then compute the rate  $r$  of events occurring during the state of interest in each cluster and compare it to  $r_{\text{all}}$  (i.e. the rate over all events in  $\mathbf{X}$ ) using a binomial test of order one. Clusters are considered significantly enriched if  $r$  is above  $r_{\text{all}}$  and the binomial test's p-value is under 0.0001.

After repeating these steps a sufficient number of times (typically 1000 or higher), we compute the enrichment score  $\mathbf{s}(i)$  as the fraction of iterations element  $i$  was assigned to a cluster where state occurrence was higher than chance. This produces a smooth distribution of score values over the feature space (Fig. 4 center). The number of clusters used has a small but noticeable impact on the result of this procedure. Lower cluster number will produce more smoothing. Conversely, higher cluster numbers will produce distributions having higher entropy at the expense of slower computation time. In our hands, any number between 5 and 100 clusters is acceptable and all give comparable results (Fig. 7; see section potential caveats below for discussion). When needed for visualization or illustration of the different steps of the procedure, projections of the  $\mathbf{X}$  manifold to a low dimension space (2D or 3D) are obtained via dimensionality reduction with UMAP[2, 3] or PHATE[4].



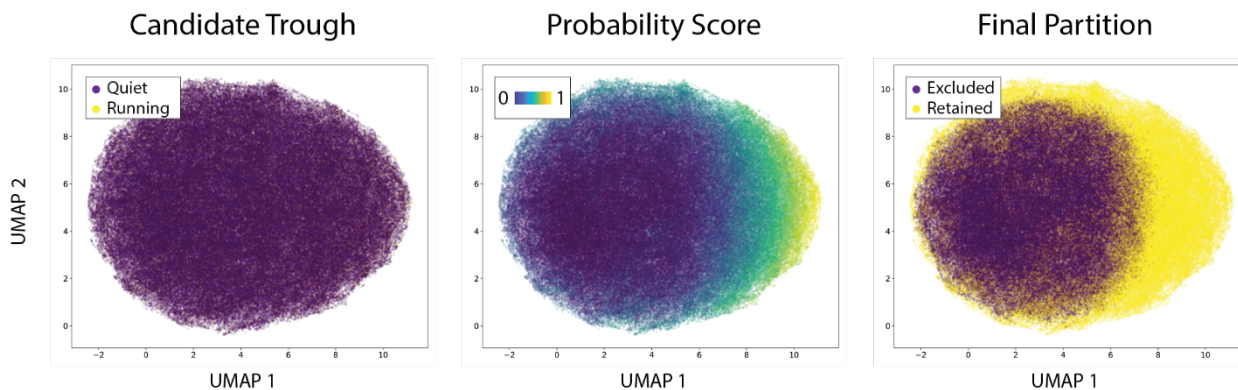

Figure 4

## Thresholding

The last step of CBASS seeks to partition a group of events having homogeneous spectro-temporal features and a high probability of occurring during the state of interest (Fig. 4 right). To achieve this, we find the threshold value of  $\mathbf{s}(\mathbf{i})$  that maximizes the following quantity:

$$\mathbf{T} = \mathbf{d}_{\mathbf{CC}} / \text{sqrt}(1/\mathbf{N}_{\text{low}} + 1/\mathbf{N}_{\text{up}})$$

where  $\mathbf{d}_{\mathbf{CC}}$  is the Mahalanobis distance between centroids above and under threshold and  $\mathbf{N}_{\text{low}}$  and  $\mathbf{N}_{\text{up}}$  are the number of events under and above threshold.  $\mathbf{T}$  can be thought of as an analog of the student  $t$  statistics in multidimensional spaces. Here, searches of the value of  $\mathbf{s}(\mathbf{i})$  maximizing  $\mathbf{T}$  are implemented using the simplex method (Matlab function *fminsearch* or the Scipy function *fmin*).

## Appendix - Generation of surrogate data

To estimate chance level for event detection, CBASS generates surrogate data having the same covariance matrix and the same spectral density in each channel as the original signal (Fig. 5). The LFP is first decomposed into principal components (Matlab function *pca* or corresponding function in the Sklearn package). We then compute the Fourier transform of each principal component (Matlab function *fft* or corresponding in Scipy). The phase of the transform of each principal component is then randomized and a real signal is reconstituted using the inverse Fourier transform (Matlab function *ifft* or corresponding in Scipy). Finally phase randomized principal components are remixed using the principal components loading. This procedure preserves LFP statistics while randomizing spatio-temporal patterns of propagation across channels (Fig. 5).

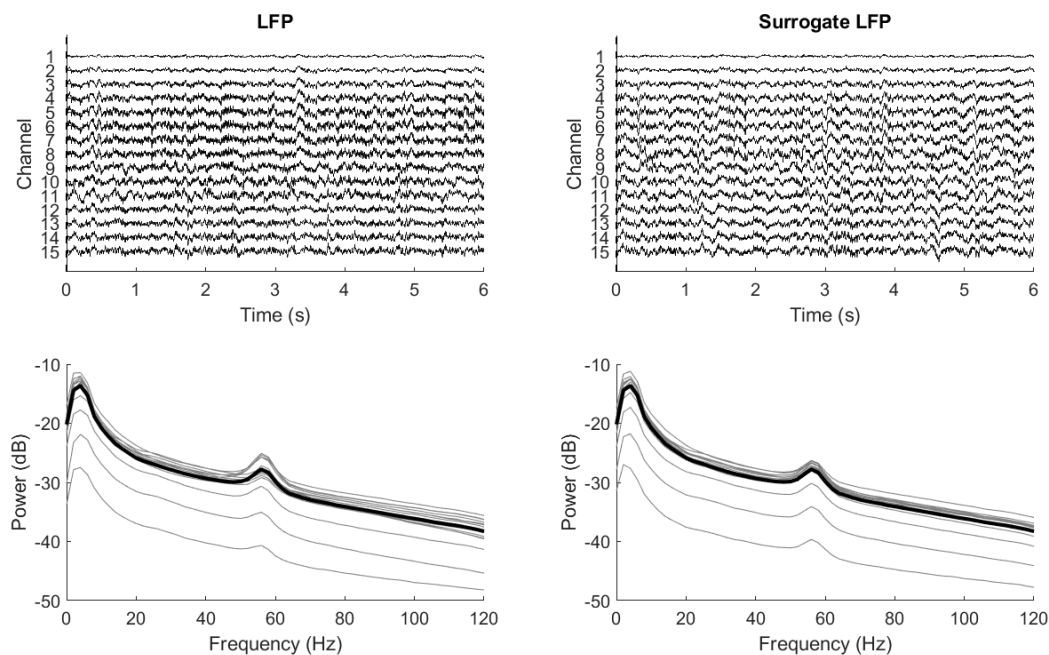

Figure 5

## Validation

The significance of CBASS's output can be evaluated by comparison to its output on surrogate data (see Generation of surrogate data). We implemented two statistical tests. First, the distribution of enrichment scores between real and surrogate data is compared using the Kolmogorov-Smirnov (KS) test (Matlab function *kstest2* or the Scipy function *ks\_2samp*). Failure to pass this test indicates that spectro-temporal features do not yield more information about the occurrence of the state than expected by chance. Second, we calculate the proportion of event in surrogate data falling over the enrichment score threshold. This can be seen as a p-value representing how likely it is for events to be detected when spectro-temporal features do not give information about state occurrence. In the visual cortex of awake mice, we found CBASS to be effective at detecting band specific activity motifs evoked by visual stimulation in the beta range (15-30Hz) and by locomotion in the gamma range (30-80Hz). Current Source Density analysis (CSD) revealed that state enriched events are associated to specific current sink patterns across cortical layers (Fig. 6 left). The frequency of occurrence of the motifs increases during the selected state (Fig 6. center). Finally, spectra acquired when the frequency of occurrence of the motif is high (Fig. 6 right) look highly similar to spectra evoked by the selected state for each type of activity (Fig. 1).

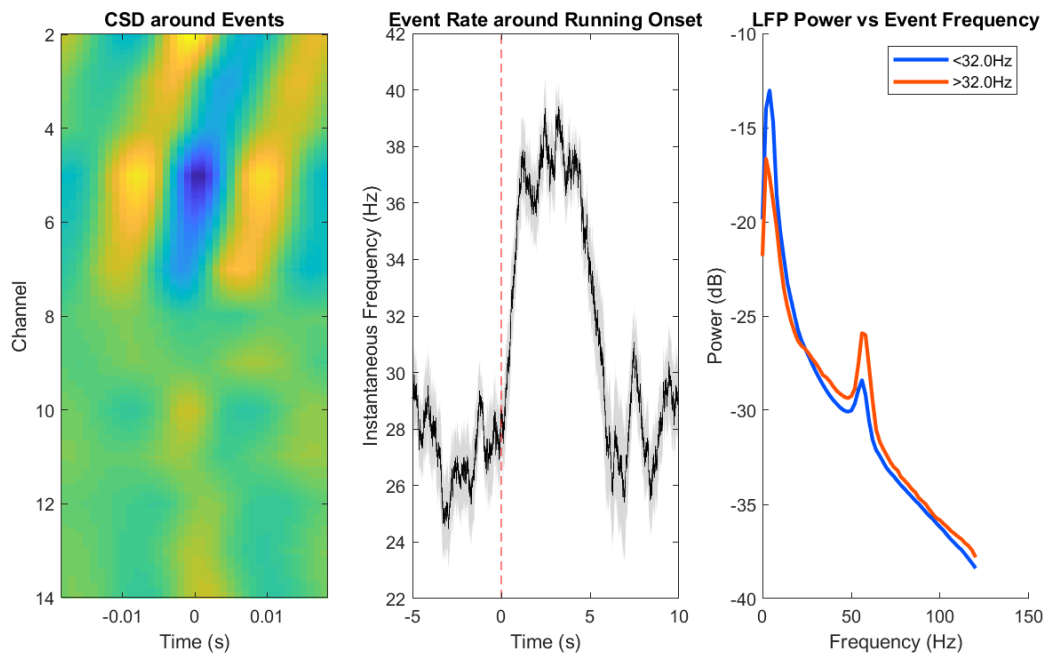

Figure 6

### Potential caveats - optimizing cluster number for probability estimation

To estimate state occurrence probability based on features, CBASS partitions a set of band specific events into an arbitrary number of clusters (see section Probability scoring above). This segmentation is repeated to produce a smooth probability distribution of the state of occurrence over events based on spectro-temporal dynamics. Lower cluster numbers will result in more smoothing whereas higher number will tend to produce more contrasted distributions. If the number of clusters is not high enough the procedure might fail to detect small regions where state probability is high. Choosing a number that is too high on the other hand, will increase computation times. In our hand the output of the method is very robust to changes in cluster number (Fig. 7). However, Applying CBASS might require testing an increasing number of clusters for the kind of problem that is meant to be addressed. We advise to choose the minimal number of clusters yielding a stable result.

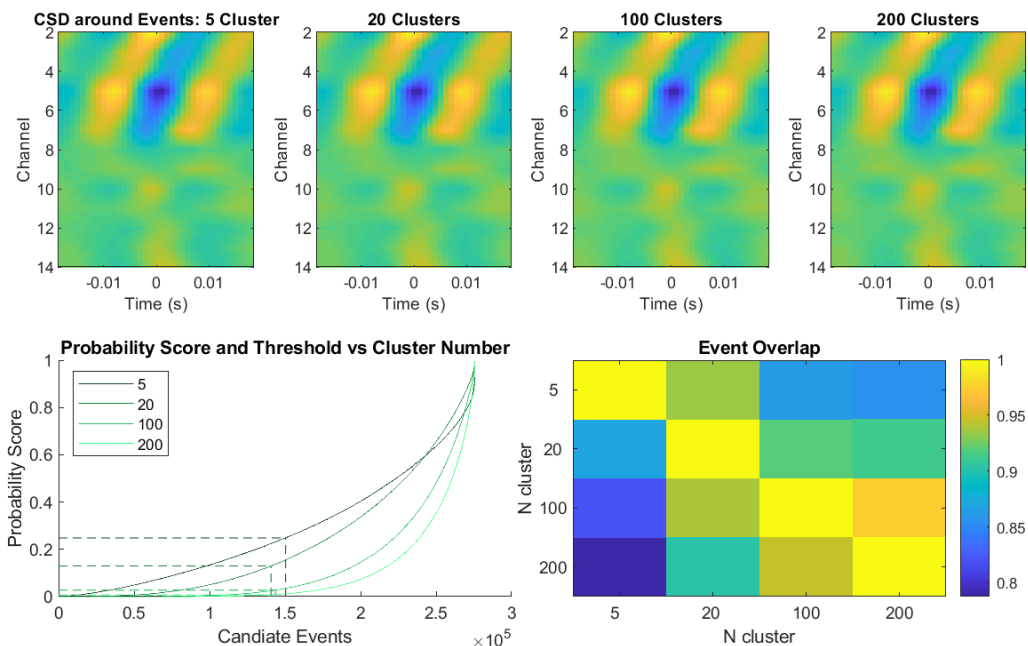

Figure 7

## Reference

1. Marple, Lawrence. Computing the discrete-time analytic signal via FFT. IEEE Transactions on signal processing 47, no. 9 (1999) 2600-2603.
2. Becht, E. et al. Dimensionality reduction for visualizing single-cell data using UMAP. Nat. Biotechnol. 37, 38–44 (2019).
3. McInnes, L., Healy, J. & Melville, J. UMAP Uniform Manifold Approximation and Projection for Dimension Reduction. (2018).
4. Moon, K. R. et al. Visualizing structure and transitions in high-dimensional biological data. Nat. Biotechnol. 37, 1482–1492 (2019).
